# Supplementary material for: Cytokine/Chemokine Release Patterns and Transcriptomic Profiles of LPS/IFNγ-Activated Human Macrophages Differentiated with Heat-Killed Mycobacterium obuense, M-CSF, or GM-CSF
Source: MDPI journal article supplement (doi:10.3390/ijms22137214), 2021-07-05
Supplement: s1 [file s1]

**Table S1.** Transcripts that are significantly differentially expressed among M-MDM(LPS/IFN $\gamma$ ), GM-MDM(LPS/IFN $\gamma$ ), and Mob-MDM(LPS/IFN $\gamma$ ).

| RefSeq transcript ID | Symbol           | Fold Change                                                 |                                                            |                                                           |
|----------------------|------------------|-------------------------------------------------------------|------------------------------------------------------------|-----------------------------------------------------------|
|                      |                  | Mob-MDM(LPS/IFN $\gamma$ )<br>vs. GM-MDM(LPS/IFN $\gamma$ ) | Mob-MDM(LPS/IFN $\gamma$ )<br>vs. M-MDM(LPS/IFN $\gamma$ ) | M-MDM(LPS/IFN $\gamma$ )<br>vs. GM-MDM(LPS/IFN $\gamma$ ) |
| NM_000758            | <i>CSF2</i>      | 38.14                                                       | 47.90                                                      | -1.26                                                     |
| NM_000619            | <i>IFNG</i>      | 34.43                                                       | 22.54                                                      | 1.53                                                      |
| NM_002994            | <i>CXCL5</i>     | 27.00                                                       | 18.59                                                      | 1.45                                                      |
| NM_004131            | <i>GZMB</i>      | 26.41                                                       | 12.47                                                      | 2.12                                                      |
| NM_000096            | <i>CP</i>        | 21.10                                                       | 19.66                                                      | 1.07                                                      |
| NM_000878            | <i>IL2RB</i>     | 19.00                                                       | 8.68                                                       | 2.19                                                      |
| NM_014767            | <i>SPOCK2</i>    | 18.48                                                       | 8.22                                                       | 2.25                                                      |
| NM_016584            | <i>IL23A</i>     | 18.25                                                       | 42.79                                                      | -2.34                                                     |
| NM_172219            | <i>CSF3</i>      | 17.84                                                       | 16.66                                                      | 1.07                                                      |
| NM_003537            | <i>HIST1H3B</i>  | 16.97                                                       | 14.05                                                      | 1.21                                                      |
| NM_003531            | <i>HIST1H3C</i>  | 16.43                                                       | 11.00                                                      | 1.49                                                      |
| NM_003534            | <i>HIST1H3G</i>  | 15.88                                                       | 11.89                                                      | 1.34                                                      |
| NM_001767            | <i>CD2</i>       | 14.85                                                       | 11.00                                                      | 1.35                                                      |
| NM_005322            | <i>HIST1H1B</i>  | 13.48                                                       | 6.97                                                       | 1.93                                                      |
| NM_001005464.1       | <i>HIST2H3A</i>  | 13.48                                                       | 8.08                                                       | 1.67                                                      |
| NM_021059.1          | <i>HIST2H3C</i>  | 13.48                                                       | 8.08                                                       | 1.67                                                      |
| NM_001034            | <i>RRM2</i>      | 12.53                                                       | 13.10                                                      | -1.05                                                     |
| NM_021066            | <i>HIST1H2AJ</i> | 12.50                                                       | 8.81                                                       | 1.42                                                      |
| NR_046035            | <i>CXCL1</i>     | 12.45                                                       | 7.96                                                       | 1.56                                                      |
| NM_003521            | <i>HIST1H2BM</i> | 12.44                                                       | 9.80                                                       | 1.27                                                      |
| NM_000584            | <i>IL8</i>       | 11.47                                                       | 28.21                                                      | -2.46                                                     |
| NM_003511            | <i>HIST1H2AL</i> | 10.45                                                       | 6.26                                                       | 1.67                                                      |
| NR_033662            | <i>CSF3</i>      | 10.17                                                       | 13.61                                                      | -1.34                                                     |
| NM_021018            | <i>HIST1H3F</i>  | 10.00                                                       | 6.18                                                       | 1.62                                                      |
| NR_046371            | <i>CP</i>        | 9.91                                                        | 7.26                                                       | 1.36                                                      |
| NM_019618            | <i>IL36G</i>     | 9.73                                                        | 10.75                                                      | -1.10                                                     |
| NM_000576            | <i>IL1B</i>      | 9.52                                                        | 10.43                                                      | -1.09                                                     |
| NM_001144966         | <i>NEDD4L</i>    | 9.46                                                        | 10.34                                                      | -1.09                                                     |
| NM_003535            | <i>HIST1H3J</i>  | 8.74                                                        | 7.73                                                       | 1.13                                                      |
| NM_001071            | <i>TYMS</i>      | 8.53                                                        | 5.47                                                       | 1.56                                                      |
| NM_002561            | <i>P2RX5</i>     | 8.27                                                        | 10.28                                                      | -1.24                                                     |
| NM_001161443         | <i>SH2D2A</i>    | 8.23                                                        | 6.96                                                       | 1.18                                                      |
| NM_000733            | <i>CD3E</i>      | 8.18                                                        | 7.71                                                       | 1.06                                                      |

|              |                  |      |       |       |
|--------------|------------------|------|-------|-------|
| NM_030915    | <i>LBH</i>       | 8.14 | 5.32  | 1.53  |
| NM_005356    | <i>LCK</i>       | 7.92 | 7.92  | 1.00  |
| NM_003519    | <i>HIST1H2BL</i> | 7.88 | 3.87  | 2.04  |
| NM_024508    | <i>ZBED2</i>     | 7.81 | 5.77  | 1.35  |
| NM_052916    | <i>RNF157</i>    | 7.76 | 7.44  | 1.04  |
| NM_001005464 | <i>HIST2H3A</i>  | 7.70 | 7.51  | 1.03  |
| NM_021059    | <i>HIST2H3C</i>  | 7.70 | 7.51  | 1.03  |
| NM_001083116 | <i>PRF1</i>      | 7.69 | 5.24  | 1.47  |
| NM_001145966 | <i>MKI67</i>     | 7.50 | 5.53  | 1.36  |
| NM_052838    | <i>1-Sep</i>     | 7.35 | 5.06  | 1.45  |
| NM_001511    | <i>CXCL1</i>     | 7.34 | 8.90  | -1.21 |
| NM_005442    | <i>EOMES</i>     | 7.25 | 4.92  | 1.48  |
| NM_198827    | <i>GPR133</i>    | 7.25 | 15.87 | -2.19 |
| NM_002466    | <i>MYBL2</i>     | 7.19 | 6.33  | 1.13  |
| NM_003509    | <i>HIST1H2AI</i> | 7.10 | 3.43  | 2.07  |
| NM_012092    | <i>ICOS</i>      | 7.04 | 6.73  | 1.04  |
| NM_005238    | <i>ETS1</i>      | 6.98 | 2.57  | 2.72  |
| NM_006564    | <i>CXCR6</i>     | 6.93 | 7.04  | -1.02 |
| NM_017709    | <i>FAM46C</i>    | 6.61 | 6.23  | 1.06  |
| NM_005816    | <i>CD96</i>      | 6.60 | 4.17  | 1.58  |
| NM_001042600 | <i>MAP4K1</i>    | 6.57 | 5.59  | 1.17  |
| NM_001130046 | <i>CCL20</i>     | 6.48 | 13.12 | -2.03 |
| NM_003645    | <i>SLC27A2</i>   | 6.39 | 5.92  | 1.08  |
| NM_001143965 | <i>TBC1D7</i>    | 6.32 | 2.72  | 2.32  |
| NM_002090    | <i>CXCL3</i>     | 6.26 | 3.17  | 1.97  |
| NM_004195    | <i>TNFRSF18</i>  | 6.16 | 9.76  | -1.58 |
| NM_000655    | <i>SELL</i>      | 6.12 | 5.45  | 1.12  |
| NM_006433    | <i>GNLY</i>      | 6.12 | 4.85  | 1.26  |
| NM_000759    | <i>CSF3</i>      | 6.10 | 15.20 | -2.49 |
| NM_002526    | <i>NT5E</i>      | 5.87 | 15.90 | -2.71 |
| NM_015277    | <i>NEDD4L</i>    | 5.86 | 2.46  | 2.39  |
| NM_175055    | <i>HIST3H2BB</i> | 5.85 | 3.76  | 1.56  |
| NM_206925    | <i>CA12</i>      | 5.83 | 4.34  | 1.34  |
| NM_006144    | <i>GZMA</i>      | 5.81 | 5.08  | 1.14  |
| NM_006725    | <i>CD6</i>       | 5.79 | 5.46  | 1.06  |
| NM_021064    | <i>HIST1H2AG</i> | 5.78 | 2.96  | 1.95  |
| NM_018410    | <i>HJURP</i>     | 5.72 | 5.72  | 1.00  |
| NM_003514    | <i>HIST1H2AM</i> | 5.70 | 2.87  | 1.99  |
| NM_001079    | <i>ZAP70</i>     | 5.65 | 5.02  | 1.12  |
| NM_021062    | <i>HIST1H2BB</i> | 5.63 | 2.68  | 2.10  |

|              |                  |      |       |       |
|--------------|------------------|------|-------|-------|
| NM_004430    | <i>EGR3</i>      | 5.59 | 4.98  | 1.12  |
| NM_003536    | <i>HIST1H3H</i>  | 5.58 | 3.07  | 1.82  |
| NM_016448    | <i>DTL</i>       | 5.55 | 5.52  | 1.01  |
| NM_001131010 | <i>SATB1</i>     | 5.50 | 4.42  | 1.25  |
| NM_173157    | <i>NR4A1</i>     | 5.40 | 9.23  | -1.71 |
| NM_004591    | <i>CCL20</i>     | 5.38 | 12.77 | -2.37 |
| NM_001007466 | <i>TULP4</i>     | 5.33 | 1.81  | 2.95  |
| NM_003548    | <i>HIST2H4A</i>  | 5.32 | 3.15  | 1.69  |
| NM_001034077 | <i>HIST2H4B</i>  | 5.32 | 3.15  | 1.69  |
| NM_003513    | <i>HIST1H2AB</i> | 5.28 | 3.73  | 1.42  |
| NM_007288    | <i>MME</i>       | 5.26 | 2.33  | 2.26  |
| NM_001144970 | <i>NEDD4L</i>    | 5.25 | 3.34  | 1.57  |
| NM_014220    | <i>TM4SF1</i>    | 5.24 | 4.60  | 1.14  |
| NM_015482    | <i>SLC22A23</i>  | 5.18 | -1.53 | 7.91  |
| NM_033423    | <i>GZMH</i>      | 5.16 | 3.47  | 1.49  |
| NM_003527    | <i>HIST1H2BO</i> | 5.14 | 3.00  | 1.71  |
| NM_001270472 | <i>MCM3</i>      | 5.13 | 2.46  | 2.09  |
| NM_018136    | <i>ASPM</i>      | 5.07 | 5.85  | -1.15 |
| NM_001718    | <i>BMP6</i>      | 5.06 | 2.34  | 2.16  |
| NM_006257    | <i>PRKCQ</i>     | 5.04 | 3.62  | 1.39  |
| NM_001123375 | <i>HIST2H3D</i>  | 5.02 | 3.18  | 1.58  |
| NM_001559    | <i>IL12RB2</i>   | 5.00 | 5.00  | 1.00  |
| NM_080596    | <i>HIST1H2AH</i> | 4.94 | 2.13  | 2.31  |
| NM_003853    | <i>IL18RAP</i>   | 4.92 | 4.44  | 1.11  |
| NM_000575    | <i>IL1A</i>      | 4.92 | 17.83 | -3.63 |
| NM_133272    | <i>FCAR</i>      | 4.87 | 4.42  | 1.10  |
| NM_178844    | <i>NLRC3</i>     | 4.86 | 3.69  | 1.32  |
| NM_004091    | <i>E2F2</i>      | 4.86 | 4.72  | 1.03  |
| NM_001243121 | <i>PDE4A</i>     | 4.82 | 2.97  | 1.62  |
| NM_001067    | <i>TOP2A</i>     | 4.81 | 5.10  | -1.06 |
| NM_001394    | <i>DUSP4</i>     | 4.77 | 9.18  | -1.92 |
| NM_002000    | <i>FCAR</i>      | 4.77 | 4.41  | 1.08  |
| NM_018004    | <i>TMEM45A</i>   | 4.71 | 3.23  | 1.46  |
| NR_027353    | <i>CD8A</i>      | 4.67 | 2.12  | 2.20  |
| NM_003533    | <i>HIST1H3I</i>  | 4.66 | 2.32  | 2.01  |
| NM_006137    | <i>CD7</i>       | 4.65 | 3.05  | 1.52  |
| NM_001218    | <i>CA12</i>      | 4.59 | 4.68  | -1.02 |
| NM_000734    | <i>CD247</i>     | 4.56 | 5.37  | -1.18 |
| NM_002263.1  | <i>KIFC1</i>     | 4.55 | 4.61  | -1.01 |
| NM_012223    | <i>MYO1B</i>     | 4.53 | 6.32  | -1.39 |

|                |                  |      |       |       |
|----------------|------------------|------|-------|-------|
| NM_002964      | <i>S100A8</i>    | 4.53 | 2.12  | 2.14  |
| NM_002089      | <i>CXCL2</i>     | 4.51 | 3.87  | 1.16  |
| NM_003548.1    | <i>HIST2H4A</i>  | 4.50 | 2.84  | 1.59  |
| NM_001034077.1 | <i>HIST2H4B</i>  | 4.50 | 2.84  | 1.59  |
| NM_001267058   | <i>CASP7</i>     | 4.47 | 1.86  | 2.40  |
| NM_201538      | <i>NDRG2</i>     | 4.47 | 4.47  | 1.00  |
| NM_145019      | <i>FAM124A</i>   | 4.45 | 7.92  | -1.78 |
| NM_016343      | <i>CENPF</i>     | 4.42 | 3.12  | 1.42  |
| NM_021058      | <i>HIST1H2BJ</i> | 4.39 | 2.35  | 1.87  |
| NM_001168      | <i>BIRC5</i>     | 4.37 | 4.30  | 1.02  |
| NM_003546      | <i>HIST1H4L</i>  | 4.36 | 3.42  | 1.28  |
| NM_001164114   | <i>CASS4</i>     | 4.36 | 4.68  | -1.07 |
| NM_032415      | <i>CARD11</i>    | 4.32 | 4.84  | -1.12 |
| NM_002575      | <i>SERPINB2</i>  | 4.30 | 4.57  | -1.06 |
| NM_031445      | <i>AMMECR1L</i>  | 4.29 | -1.05 | 4.48  |
| NM_002178      | <i>IGFBP6</i>    | 4.25 | 1.91  | 2.23  |
| NM_003539      | <i>HIST1H4D</i>  | 4.24 | 2.88  | 1.47  |
| NM_000732      | <i>CD3D</i>      | 4.20 | 4.20  | 1.00  |
| NM_012112      | <i>TPX2</i>      | 4.19 | 4.78  | -1.14 |
| NM_002775      | <i>HTRA1</i>     | 4.18 | 1.82  | 2.30  |
| NM_013308      | <i>GPR171</i>    | 4.15 | 3.84  | 1.08  |
| NM_003495      | <i>HIST1H4I</i>  | 4.15 | 1.83  | 2.26  |
| NM_001164586   | <i>IGFN1</i>     | 4.11 | 13.13 | -3.19 |
| NM_001008540   | <i>CXCR4</i>     | 4.06 | 3.49  | 1.16  |
| NM_003538      | <i>HIST1H4A</i>  | 4.05 | 3.66  | 1.11  |
| NM_006845      | <i>KIF2C</i>     | 4.05 | 5.06  | -1.25 |
| NM_002928      | <i>RGS16</i>     | 4.05 | 2.14  | 1.89  |
| NM_001253792   | <i>ZNF444</i>    | 4.04 | 1.86  | 2.18  |
| NR_026692      | <i>CD209</i>     | 4.03 | 6.42  | -1.59 |
| NM_020356      | <i>CASS4</i>     | 4.02 | 3.41  | 1.18  |
| NM_003541      | <i>HIST1H4K</i>  | 4.01 | 1.83  | 2.19  |
| NM_001255      | <i>CDC20</i>     | 3.99 | 3.44  | 1.16  |
| NM_001130158   | <i>MYO1B</i>     | 3.99 | 6.22  | -1.56 |
| NM_001680      | <i>FXVD2</i>     | 3.98 | 3.98  | 1.00  |
| NM_201541      | <i>NDRG2</i>     | 3.98 | 16.88 | -4.24 |
| NM_003523      | <i>HIST1H2BE</i> | 3.97 | 2.46  | 1.62  |
| NM_000245      | <i>MET</i>       | 3.93 | 5.07  | -1.29 |
| NM_002875      | <i>RAD51</i>     | 3.92 | 2.97  | 1.32  |
| NM_004603      | <i>STX1A</i>     | 3.92 | 2.47  | 1.59  |
| NM_014391      | <i>ANKRD1</i>    | 3.92 | 13.56 | -3.46 |

|              |                  |      |       |       |
|--------------|------------------|------|-------|-------|
| NM_002984    | <i>CCL4</i>      | 3.90 | 2.90  | 1.35  |
| NR_037716    | <i>RNASEK</i>    | 3.88 | 1.97  | 1.97  |
| NM_003650    | <i>CST7</i>      | 3.86 | 2.01  | 1.92  |
| NM_004523    | <i>KIF11</i>     | 3.85 | 3.87  | -1.00 |
| NM_003510    | <i>HIST1H2AK</i> | 3.84 | 1.96  | 1.95  |
| NM_175840    | <i>SMOX</i>      | 3.83 | 5.21  | -1.36 |
| NM_019074    | <i>DLL4</i>      | 3.82 | -3.72 | 14.20 |
| NM_001204519 | <i>P2RX5</i>     | 3.81 | 2.89  | 1.32  |
| NM_003529    | <i>HIST1H3A</i>  | 3.81 | 1.82  | 2.09  |
| NM_005225    | <i>E2F1</i>      | 3.79 | 5.86  | -1.55 |
| NM_002467    | <i>MYC</i>       | 3.78 | 2.84  | 1.33  |
| NM_003524    | <i>HIST1H2BH</i> | 3.77 | 3.07  | 1.23  |
| NM_057158    | <i>DUSP4</i>     | 3.75 | 8.71  | -2.32 |
| NM_020530    | <i>OSM</i>       | 3.75 | 5.81  | -1.55 |
| NM_000572    | <i>IL10</i>      | 3.74 | -2.11 | 7.88  |
| NM_016426    | <i>GTSE1</i>     | 3.72 | 3.72  | 1.00  |
| NM_001258216 | <i>IL12RB2</i>   | 3.72 | 3.21  | 1.16  |
| NM_032571    | <i>EMR3</i>      | 3.70 | 9.81  | -2.65 |
| NM_001003675 | <i>LDLRAD4</i>   | 3.70 | 2.79  | 1.33  |
| NM_080722    | <i>ADAMTS14</i>  | 3.69 | 2.17  | 1.70  |
| NM_139155    | <i>ADAMTS14</i>  | 3.69 | 2.17  | 1.70  |
| NM_005320    | <i>HIST1H1D</i>  | 3.68 | 1.83  | 2.01  |
| NM_018349    | <i>MCTP2</i>     | 3.66 | 3.09  | 1.18  |
| NM_000212    | <i>ITGB3</i>     | 3.66 | 6.34  | -1.73 |
| NM_006474    | <i>PDPN</i>      | 3.65 | -1.54 | 5.60  |
| NM_004336    | <i>BUB1</i>      | 3.65 | 4.44  | -1.22 |
| NM_001002017 | <i>HCFC1R1</i>   | 3.60 | 1.74  | 2.07  |
| NM_012483    | <i>GNLY</i>      | 3.60 | 2.73  | 1.32  |
| NM_005733    | <i>KIF20A</i>    | 3.56 | 3.44  | 1.04  |
| NM_002965    | <i>S100A9</i>    | 3.56 | 2.02  | 1.76  |
| NM_003525    | <i>HIST1H2BI</i> | 3.55 | 2.37  | 1.50  |
| NM_002609    | <i>PDGFRB</i>    | 3.51 | 1.68  | 2.08  |
| NM_012481    | <i>IKZF3</i>     | 3.50 | 3.03  | 1.16  |
| NM_001163524 | <i>ITPRIPL1</i>  | 3.50 | 2.70  | 1.30  |
| NM_005601    | <i>NKG7</i>      | 3.49 | 1.22  | 2.86  |
| NM_001165931 | <i>RRM2</i>      | 3.48 | 3.48  | 1.00  |
| NM_007287    | <i>MME</i>       | 3.47 | 3.07  | 1.13  |
| NM_182914    | <i>SYNE2</i>     | 3.47 | 3.87  | -1.12 |
| NM_001992    | <i>F2R</i>       | 3.46 | 3.37  | 1.03  |
| NM_001136232 | <i>SEC13</i>     | 3.46 | 2.50  | 1.38  |

|              |                    |      |       |       |
|--------------|--------------------|------|-------|-------|
| NM_001109    | <i>ADAM8</i>       | 3.44 | 1.33  | 2.58  |
| NM_001202233 | <i>NR4A1</i>       | 3.44 | 4.16  | -1.21 |
| NM_005916    | <i>MCM7</i>        | 3.43 | 2.91  | 1.18  |
| NM_152515    | <i>CKAP2L</i>      | 3.43 | 3.43  | 1.00  |
| NM_001145664 | <i>RFX8</i>        | 3.43 | 3.43  | 1.00  |
| NM_003540    | <i>HIST1H4F</i>    | 3.41 | 1.84  | 1.86  |
| NM_015441    | <i>OLFML2B</i>     | 3.40 | -1.73 | 5.89  |
| NM_005030    | <i>PLK1</i>        | 3.39 | 2.90  | 1.17  |
| NM_030754    | <i>SAA2</i>        | 3.37 | 2.54  | 1.33  |
| NR_073375    | <i>MCM2</i>        | 3.33 | 4.31  | -1.29 |
| NM_001237    | <i>CCNA2</i>       | 3.33 | 2.78  | 1.20  |
| NM_014207    | <i>CD5</i>         | 3.32 | 2.86  | 1.16  |
| NM_001785    | <i>CDA</i>         | 3.32 | 10.59 | -3.19 |
| NM_001257410 | <i>IKZF3</i>       | 3.32 | 2.66  | 1.24  |
| NM_001271099 | <i>PUF60</i>       | 3.28 | 1.71  | 1.91  |
| NM_001254    | <i>CDC6</i>        | 3.26 | 3.53  | -1.08 |
| NM_017720    | <i>STAP2</i>       | 3.25 | 2.21  | 1.47  |
| NM_001197221 | <i>PDE4D</i>       | 3.25 | 3.90  | -1.20 |
| NM_024007    | <i>EBF1</i>        | 3.25 | 3.01  | 1.08  |
| NM_001244950 | <i>SPOCK2</i>      | 3.25 | 4.77  | -1.47 |
| NM_001079907 | <i>ZNF331</i>      | 3.25 | 2.61  | 1.24  |
| NM_032108    | <i>SEMA6B</i>      | 3.24 | 3.50  | -1.08 |
| NM_001262    | <i>CDKN2C</i>      | 3.23 | 2.54  | 1.27  |
| NM_014479    | <i>ADAMDEC1</i>    | 3.21 | -1.13 | 3.64  |
| NM_001242312 | <i>FAM124A</i>     | 3.21 | 10.73 | -3.35 |
| NM_001786    | <i>CDK1</i>        | 3.20 | 2.76  | 1.16  |
| NM_000600    | <i>IL6</i>         | 3.18 | 14.74 | -4.63 |
| NM_018643    | <i>TREM1</i>       | 3.18 | 10.27 | -3.23 |
| NM_201540    | <i>NDRG2</i>       | 3.18 | 7.66  | -2.41 |
| NM_144720    | <i>JAKMIP1</i>     | 3.16 | 3.16  | 1.00  |
| NM_002608    | <i>PDGFB</i>       | 3.16 | 4.28  | -1.35 |
| NM_003975    | <i>SH2D2A</i>      | 3.15 | 3.15  | 1.00  |
| NM_002417    | <i>MKI67</i>       | 3.15 | 8.77  | -2.79 |
| NR_038380    | <i>SLC7A11-AS1</i> | 3.14 | 3.63  | -1.15 |
| NM_001144894 | <i>CD209</i>       | 3.14 | 2.98  | 1.05  |
| NM_003522    | <i>HIST1H2BF</i>   | 3.14 | 2.49  | 1.26  |
| NM_012258    | <i>HEY1</i>        | 3.14 | 3.91  | -1.25 |
| NM_001271606 | <i>BASP1</i>       | 3.13 | 1.17  | 2.67  |
| NM_003544    | <i>HIST1H4B</i>    | 3.12 | 2.57  | 1.22  |
| NM_145687    | <i>MAP4K4</i>      | 3.11 | 4.13  | -1.33 |

|                |                 |      |       |       |
|----------------|-----------------|------|-------|-------|
| NM_000639      | <i>FASLG</i>    | 3.10 | 2.51  | 1.24  |
| NM_198042      | <i>PDLIM2</i>   | 3.10 | 5.01  | -1.62 |
| NM_004428      | <i>EFNA1</i>    | 3.08 | 4.12  | -1.34 |
| NM_177963      | <i>SYT12</i>    | 3.08 | 7.37  | -2.39 |
| NM_013282      | <i>UHRF1</i>    | 3.07 | 2.71  | 1.13  |
| NM_016441      | <i>CRIM1</i>    | 3.06 | 3.12  | -1.02 |
| NM_004994      | <i>MMP9</i>     | 3.06 | 1.08  | 2.82  |
| NM_021968      | <i>HIST1H4J</i> | 3.06 | 1.64  | 1.87  |
| NM_001099439   | <i>EPHA10</i>   | 3.04 | 3.03  | 1.00  |
| NM_000608      | <i>ORM2</i>     | 3.02 | 3.17  | -1.05 |
| NM_000403      | <i>GALE</i>     | 3.01 | 6.46  | -2.14 |
| NM_001197222   | <i>PDE4D</i>    | 3.01 | 3.30  | -1.10 |
| NM_138768      | <i>MYEOV</i>    | 3.00 | 4.66  | -1.55 |
| NM_001264573   | <i>KIF18B</i>   | 3.00 | 2.87  | 1.05  |
| NM_001145271   | <i>ADAMDEC1</i> | 3.00 | -1.16 | 3.46  |
| NM_000228      | <i>LAMB3</i>    | 2.99 | 2.45  | 1.22  |
| NM_022770      | <i>GIN3</i>     | 2.99 | 2.85  | 1.05  |
| NM_005214      | <i>CTLA4</i>    | 2.98 | 6.60  | -2.22 |
| NM_001243198   | <i>HIP1</i>     | 2.97 | 5.56  | -1.87 |
| NM_002082      | <i>GRK6</i>     | 2.97 | 2.51  | 1.18  |
| NM_002983      | <i>CCL3</i>     | 2.97 | 3.31  | -1.12 |
| NM_015071      | <i>ARHGAP26</i> | 2.95 | 1.71  | 1.73  |
| NM_003542      | <i>HIST1H4C</i> | 2.94 | 2.19  | 1.34  |
| NM_014331      | <i>SLC7A11</i>  | 2.91 | 2.67  | 1.09  |
| NM_001657.1    | <i>AREG</i>     | 2.91 | 2.92  | -1.00 |
| NM_014875      | <i>KIF14</i>    | 2.90 | 2.90  | 1.00  |
| NM_001243985   | <i>RELA</i>     | 2.90 | 1.22  | 2.37  |
| NM_001252102   | <i>KIF21B</i>   | 2.89 | 3.15  | -1.09 |
| NM_001242607   | <i>NCAM1</i>    | 2.88 | 3.81  | -1.32 |
| NR_024273      | <i>SEC13</i>    | 2.88 | 2.65  | 1.09  |
| NM_001257360   | <i>AMPD2</i>    | 2.86 | 3.27  | -1.14 |
| NM_004431      | <i>EPHA2</i>    | 2.85 | 5.64  | -1.97 |
| NM_001177428   | <i>TRPV4</i>    | 2.85 | 4.41  | -1.54 |
| NM_173676      | <i>PNPLA1</i>   | 2.85 | 3.96  | -1.39 |
| NM_152468      | <i>TMC8</i>     | 2.84 | 3.20  | -1.12 |
| NM_001161819   | <i>MYO1B</i>    | 2.84 | 13.18 | -4.64 |
| NM_001077511.1 | <i>TCF19</i>    | 2.84 | 2.01  | 1.41  |
| NM_033016      | <i>PDGFB</i>    | 2.82 | 4.60  | -1.63 |
| NM_004130      | <i>GYG1</i>     | 2.80 | 3.00  | -1.07 |
| NR_073484      | <i>CDK2AP2</i>  | 2.79 | 2.25  | 1.24  |

|              |                  |      |       |       |
|--------------|------------------|------|-------|-------|
| NM_005276    | <i>GPD1</i>      | 2.79 | 4.52  | -1.62 |
| NM_001006947 | <i>UHRF1BP1L</i> | 2.78 | 1.01  | 2.75  |
| NM_021953    | <i>FOXM1</i>     | 2.78 | 3.54  | -1.28 |
| NM_000073    | <i>CD3G</i>      | 2.77 | 2.77  | 1.00  |
| NM_006907    | <i>PYCR1</i>     | 2.77 | 2.76  | 1.01  |
| NM_021155    | <i>CD209</i>     | 2.77 | 6.84  | -2.47 |
| NM_012310    | <i>KIF4A</i>     | 2.77 | 2.77  | 1.00  |
| NM_182802    | <i>MCM8</i>      | 2.77 | 1.78  | 1.55  |
| NM_001211    | <i>BUB1B</i>     | 2.76 | 2.94  | -1.06 |
| NM_002236    | <i>KCNF1</i>     | 2.76 | 5.49  | -1.99 |
| NM_173483    | <i>CYP4F22</i>   | 2.75 | 4.84  | -1.76 |
| NM_080881    | <i>DBN1</i>      | 2.75 | 2.51  | 1.10  |
| NM_206918    | <i>DEGS2</i>     | 2.73 | 4.24  | -1.55 |
| NM_001161560 | <i>TNIK</i>      | 2.73 | 2.27  | 1.20  |
| NM_174918    | <i>C19orf59</i>  | 2.72 | 10.98 | -4.03 |
| NM_001001323 | <i>ATP2B1</i>    | 2.72 | 2.68  | 1.02  |
| NM_014400    | <i>LYPD3</i>     | 2.72 | 6.31  | -2.32 |
| NM_213655    | <i>WNK1</i>      | 2.71 | 1.60  | 1.70  |
| NM_006186    | <i>NR4A2</i>     | 2.71 | 3.16  | -1.16 |
| NM_024070    | <i>PVRIG</i>     | 2.71 | 1.95  | 1.39  |
| NM_005319    | <i>HIST1H1C</i>  | 2.71 | 1.63  | 1.66  |
| NM_003530    | <i>HIST1H3D</i>  | 2.70 | 2.13  | 1.27  |
| NM_003543    | <i>HIST1H4H</i>  | 2.70 | 1.74  | 1.55  |
| NM_017640    | <i>LRRC16A</i>   | 2.69 | 2.40  | 1.12  |
| NM_203394    | <i>E2F7</i>      | 2.67 | 3.35  | -1.25 |
| NM_000094    | <i>COL7A1</i>    | 2.67 | 3.06  | -1.15 |
| NM_178834    | <i>LAYN</i>      | 2.66 | 4.25  | -1.60 |
| NM_000963    | <i>PTGS2</i>     | 2.66 | 1.98  | 1.34  |
| NM_001242416 | <i>WDR20</i>     | 2.65 | 2.44  | 1.09  |
| NM_003855    | <i>IL18R1</i>    | 2.65 | 2.57  | 1.03  |
| NM_003579    | <i>RAD54L</i>    | 2.65 | 2.64  | 1.00  |
| NM_000954    | <i>PTGDS</i>     | 2.65 | 5.69  | -2.15 |
| NM_001017995 | <i>SH3PXD2B</i>  | 2.65 | 2.02  | 1.31  |
| NM_001789    | <i>CDC25A</i>    | 2.63 | 2.61  | 1.01  |
| NM_134262    | <i>RORA</i>      | 2.63 | 2.69  | -1.02 |
| NM_003582    | <i>DYRK3</i>     | 2.62 | 1.72  | 1.52  |
| NM_001113378 | <i>FANCI</i>     | 2.61 | 2.96  | -1.14 |
| NM_012168    | <i>FBXO2</i>     | 2.60 | 2.60  | 1.00  |
| NM_003095    | <i>SNRPF</i>     | 2.60 | 1.53  | 1.71  |
| NM_001042728 | <i>RARG</i>      | 2.60 | 3.05  | -1.17 |

|              |                 |      |       |       |
|--------------|-----------------|------|-------|-------|
| NM_002358    | <i>MAD2L1</i>   | 2.60 | 2.82  | -1.08 |
| NM_001172128 | <i>IL16</i>     | 2.60 | 3.46  | -1.33 |
| NM_001400    | <i>S1PR1</i>    | 2.59 | -4.60 | 11.92 |
| NM_001256511 | <i>SSBP1</i>    | 2.59 | 1.79  | 1.45  |
| NM_005723    | <i>TSPAN5</i>   | 2.58 | 5.14  | -1.99 |
| NM_004867    | <i>ITM2A</i>    | 2.58 | 2.58  | 1.00  |
| NM_198517    | <i>TBC1D10C</i> | 2.58 | 2.44  | 1.06  |
| NM_002122    | <i>HLA-DQA1</i> | 2.57 | 3.85  | -1.49 |
| NM_001256295 | <i>ETS2</i>     | 2.57 | 1.32  | 1.95  |
| NM_021777    | <i>ADAM28</i>   | 2.57 | -1.12 | 2.88  |
| NM_001242608 | <i>NCAM1</i>    | 2.57 | 4.47  | -1.74 |
| NM_002638    | <i>PI3</i>      | 2.56 | 1.90  | 1.35  |
| NM_006101    | <i>NDC80</i>    | 2.56 | 2.86  | -1.12 |
| NM_001335    | <i>CTSW</i>     | 2.55 | 3.53  | -1.38 |
| NM_173799    | <i>TIGIT</i>    | 2.55 | 2.73  | -1.07 |
| NM_001161562 | <i>TNIK</i>     | 2.53 | 2.10  | 1.21  |
| NM_022898    | <i>BCL11B</i>   | 2.52 | 2.30  | 1.10  |
| NM_182666    | <i>UBE2E1</i>   | 2.51 | 1.64  | 1.53  |
| NM_207336    | <i>ZNF467</i>   | 2.51 | 1.38  | 1.82  |
| NM_033319    | <i>CENPL</i>    | 2.51 | 1.52  | 1.65  |
| NM_014965    | <i>TRAK1</i>    | 2.51 | 1.26  | 1.99  |
| NM_138371    | <i>PCED1B</i>   | 2.51 | 2.07  | 1.21  |
| NM_173091    | <i>NFATC2</i>   | 2.51 | 2.51  | 1.00  |
| NM_001015049 | <i>BAG5</i>     | 2.51 | 1.04  | 2.42  |
| NM_001256875 | <i>CDCA8</i>    | 2.51 | 3.24  | -1.29 |
| NM_001198786 | <i>POU2F1</i>   | 2.50 | 1.30  | 1.92  |
| NM_002155    | <i>HSPA6</i>    | 2.49 | 1.26  | 1.98  |
| NM_002224    | <i>ITPR3</i>    | 2.48 | 2.57  | -1.04 |
| NM_005239    | <i>ETS2</i>     | 2.48 | 1.74  | 1.42  |
| NM_138295    | <i>PKD1L1</i>   | 2.47 | 3.72  | -1.51 |
| NM_013372    | <i>GREM1</i>    | 2.47 | 2.41  | 1.02  |
| NM_021642    | <i>FCGR2A</i>   | 2.47 | 1.04  | 2.37  |
| NM_001220767 | <i>IKZF1</i>    | 2.47 | 1.43  | 1.72  |
| NM_001267050 | <i>GPR155</i>   | 2.46 | 1.67  | 1.48  |
| NM_001017420 | <i>ESCO2</i>    | 2.46 | 2.29  | 1.08  |
| NM_178859    | <i>SLC51B</i>   | 2.45 | 3.48  | -1.42 |
| NM_001017917 | <i>CYB561</i>   | 2.45 | 2.34  | 1.04  |
| NM_001271749 | <i>GPR77</i>    | 2.45 | 2.64  | -1.08 |
| NM_004701    | <i>CCNB2</i>    | 2.44 | 3.39  | -1.39 |
| NM_000615    | <i>NCAM1</i>    | 2.44 | 8.00  | -3.28 |

|              |                  |      |       |       |
|--------------|------------------|------|-------|-------|
| NM_017789    | <i>SEMA4C</i>    | 2.44 | 2.18  | 1.12  |
| NM_021052    | <i>HIST1H2AE</i> | 2.44 | 1.43  | 1.70  |
| NM_181054    | <i>HIF1A</i>     | 2.43 | -1.02 | 2.48  |
| NM_004936    | <i>CDKN2B</i>    | 2.42 | 2.07  | 1.17  |
| NM_145686    | <i>MAP4K4</i>    | 2.42 | 4.28  | -1.77 |
| NM_012145    | <i>DTYMK</i>     | 2.42 | 1.46  | 1.65  |
| NM_013252    | <i>CLEC5A</i>    | 2.42 | 10.94 | -4.52 |
| NM_001243283 | <i>ALCAM</i>     | 2.42 | 1.77  | 1.36  |
| NM_001145199 | <i>C12orf75</i>  | 2.42 | 2.42  | 1.00  |
| NM_001202514 | <i>MXD1</i>      | 2.42 | 2.66  | -1.10 |
| NM_007350    | <i>PHLDA1</i>    | 2.41 | 3.17  | -1.32 |
| NM_020689    | <i>SLC24A3</i>   | 2.41 | 3.62  | -1.51 |
| NR_028308    | <i>BRE-AS1</i>   | 2.41 | 2.50  | -1.04 |
| NM_080616    | <i>C20orf112</i> | 2.41 | 2.58  | -1.07 |
| NM_021615    | <i>CHST6</i>     | 2.39 | 2.61  | -1.09 |
| NM_001042428 | <i>ZNF205</i>    | 2.39 | -1.32 | 3.16  |
| NM_199185    | <i>NPM1</i>      | 2.39 | 2.18  | 1.10  |
| NM_001171992 | <i>C6orf223</i>  | 2.38 | -1.07 | 2.56  |
| NM_017444    | <i>CHRA1</i>     | 2.38 | 1.48  | 1.60  |
| NM_018131    | <i>CEP55</i>     | 2.38 | 2.80  | -1.18 |
| NM_031966    | <i>CCNB1</i>     | 2.38 | 2.87  | -1.21 |
| NM_018518    | <i>MCM10</i>     | 2.37 | 2.37  | 1.00  |
| NR_034033    | <i>LOC285972</i> | 2.37 | 5.08  | -2.15 |
| NM_001139500 | <i>FGF13</i>     | 2.36 | 1.82  | 1.30  |
| NM_175839    | <i>SMOX</i>      | 2.36 | 5.60  | -2.37 |
| NM_005338    | <i>HIP1</i>      | 2.36 | 4.00  | -1.70 |
| NM_004217    | <i>AURKB</i>     | 2.36 | 2.54  | -1.08 |
| NM_015297    | <i>KIAA1045</i>  | 2.36 | 2.71  | -1.15 |
| NM_014450    | <i>SIT1</i>      | 2.36 | 2.36  | 1.00  |
| NM_006096    | <i>NDRG1</i>     | 2.35 | 2.26  | 1.04  |
| NM_152562    | <i>CDCA2</i>     | 2.35 | 4.53  | -1.92 |
| NM_182665    | <i>RASSF5</i>    | 2.35 | 3.22  | -1.37 |
| NM_198947    | <i>FAM111B</i>   | 2.35 | 2.35  | 1.00  |
| NM_201536    | <i>NDRG2</i>     | 2.34 | 2.34  | 1.00  |
| NM_001131027 | <i>PDLIM4</i>    | 2.34 | 7.60  | -3.25 |
| NM_001040694 | <i>INCENP</i>    | 2.33 | 1.51  | 1.54  |
| NM_182751    | <i>MCM10</i>     | 2.32 | 2.30  | 1.01  |
| NR_027767    | <i>TNIK</i>      | 2.32 | 2.85  | -1.23 |
| NM_201539    | <i>NDRG2</i>     | 2.31 | 2.05  | 1.13  |
| NM_003467    | <i>CXCR4</i>     | 2.31 | 2.06  | 1.12  |

|                |                     |      |       |       |
|----------------|---------------------|------|-------|-------|
| NM_012193      | <i>FZD4</i>         | 2.30 | 6.47  | -2.81 |
| NM_018154      | <i>ASF1B</i>        | 2.29 | 3.89  | -1.70 |
| NM_001195728   | <i>SLC1A2</i>       | 2.29 | 3.24  | -1.41 |
| NM_006591      | <i>POLD3</i>        | 2.29 | 1.32  | 1.73  |
| NR_002720      | <i>TRPC2</i>        | 2.28 | 2.61  | -1.14 |
| NM_006693      | <i>CPSF4</i>        | 2.28 | 1.09  | 2.09  |
| NM_001198624   | <i>TNFSF13</i>      | 2.28 | 3.04  | -1.33 |
| NR_027163      | <i>C17orf76-AS1</i> | 2.28 | -1.14 | 2.58  |
| NM_017594      | <i>DIRAS2</i>       | 2.27 | 9.48  | -4.18 |
| NM_020354      | <i>ENTPD7</i>       | 2.27 | 1.69  | 1.34  |
| NM_001570      | <i>IRAK2</i>        | 2.27 | 3.06  | -1.35 |
| NM_001002800   | <i>SMC4</i>         | 2.26 | 1.95  | 1.16  |
| NM_021149      | <i>COTL1</i>        | 2.26 | 3.30  | -1.46 |
| NM_001206917   | <i>CACNB3</i>       | 2.26 | 1.46  | 1.55  |
| NM_014750      | <i>DLGAP5</i>       | 2.25 | 2.25  | 1.00  |
| NM_001243      | <i>TNFRSF8</i>      | 2.25 | -3.41 | 7.66  |
| NM_032514      | <i>MAP1LC3A</i>     | 2.24 | -1.56 | 3.50  |
| NM_017946      | <i>FKBP14</i>       | 2.24 | 2.78  | -1.24 |
| NM_005508      | <i>CCR4</i>         | 2.23 | 2.23  | 1.00  |
| NM_001170794   | <i>BACH2</i>        | 2.23 | 3.56  | -1.59 |
| NM_000594.5    | <i>TNF</i>          | 2.23 | 4.19  | -1.88 |
| NM_002988      | <i>CCL18</i>        | 2.23 | 1.27  | 1.75  |
| NM_015845      | <i>MBD1</i>         | 2.23 | 1.38  | 1.62  |
| NM_005252      | <i>FOS</i>          | 2.22 | 3.59  | -1.61 |
| NM_001159531   | <i>BEGAIN</i>       | 2.22 | 2.06  | 1.08  |
| NM_001199797   | <i>PTPN7</i>        | 2.22 | 2.99  | -1.35 |
| NR_028076      | <i>SCARF1</i>       | 2.22 | 2.17  | 1.02  |
| NM_022756      | <i>MEAF6</i>        | 2.21 | 2.65  | -1.20 |
| NM_005608      | <i>PTPRCAP</i>      | 2.21 | 1.91  | 1.16  |
| NM_003516.1    | <i>HIST2H2AA3</i>   | 2.21 | 1.36  | 1.62  |
| NM_001040874.1 | <i>HIST2H2AA4</i>   | 2.21 | 1.36  | 1.62  |
| NM_002167      | <i>ID3</i>          | 2.20 | 4.96  | -2.26 |
| NM_182746      | <i>MCM4</i>         | 2.20 | 2.39  | -1.09 |
| NM_000889      | <i>ITGB7</i>        | 2.19 | 2.71  | -1.24 |
| NM_001258320   | <i>TP53I11</i>      | 2.19 | 1.32  | 1.66  |
| NM_178448      | <i>SAPCD2</i>       | 2.19 | 2.69  | -1.23 |
| NR_033815      | <i>ALS2CL</i>       | 2.17 | 4.98  | -2.30 |
| NM_003457      | <i>ZNF207</i>       | 2.17 | 1.52  | 1.43  |
| NR_045006      | <i>NRON</i>         | 2.17 | 2.53  | -1.17 |
| NM_001258390   | <i>LAYN</i>         | 2.16 | 3.42  | -1.58 |

|              |                     |      |       |       |
|--------------|---------------------|------|-------|-------|
| NM_201442    | <i>C1S</i>          | 2.16 | 1.90  | 1.14  |
| NM_001003697 | <i>ATP5J</i>        | 2.16 | -1.33 | 2.87  |
| NM_001162497 | <i>LPAR6</i>        | 2.16 | 3.16  | -1.46 |
| NM_080655    | <i>MSANTD3</i>      | 2.16 | 1.82  | 1.18  |
| NM_001145295 | <i>NGLY1</i>        | 2.16 | 1.59  | 1.36  |
| NM_001145319 | <i>PLS1</i>         | 2.16 | 2.81  | -1.31 |
| NM_133279    | <i>FCAR</i>         | 2.15 | 2.15  | 1.00  |
| NM_016321    | <i>RHCG</i>         | 2.15 | 7.23  | -3.36 |
| NR_047648    | <i>FCGR2C</i>       | 2.15 | -1.36 | 2.91  |
| NR_038885    | <i>LOC100506385</i> | 2.15 | 1.78  | 1.20  |
| NM_003979    | <i>GPRC5A</i>       | 2.15 | 2.00  | 1.07  |
| NM_014326    | <i>DAPK2</i>        | 2.15 | 3.30  | -1.54 |
| NM_176871    | <i>PDLIM2</i>       | 2.14 | 1.51  | 1.42  |
| NM_007074    | <i>CORO1A</i>       | 2.14 | 1.92  | 1.12  |
| NM_001761    | <i>CCNF</i>         | 2.14 | 2.57  | -1.20 |
| NM_017858    | <i>TIPIN</i>        | 2.14 | 1.38  | 1.54  |
| NM_001144897 | <i>CD209</i>        | 2.14 | 4.64  | -2.17 |
| NM_001252103 | <i>KIF21B</i>       | 2.13 | 2.73  | -1.28 |
| NR_037608    | <i>SLX1A-</i>       | 2.13 | -1.11 | 2.36  |
| NR_037609    | <i>SLX1B-</i>       | 2.13 | -1.11 | 2.36  |
| NR_033801    | <i>SLC9A7P1</i>     | 2.12 | 5.69  | -2.68 |
| NM_002357    | <i>MXD1</i>         | 2.12 | 2.43  | -1.14 |
| NM_033625    | <i>RPL34</i>        | 2.12 | -1.24 | 2.63  |
| NM_001136031 | <i>ATG7</i>         | 2.11 | 1.97  | 1.07  |
| NR_027467    | <i>LIMS3</i>        | 2.11 | 1.95  | 1.08  |
| NR_038099    | <i>LIMS3L</i>       | 2.11 | 1.95  | 1.08  |
| NM_002916    | <i>RFC4</i>         | 2.11 | 1.54  | 1.37  |
| NM_001274    | <i>CHEK1</i>        | 2.11 | 2.19  | -1.04 |
| NM_032867    | <i>MICALCL</i>      | 2.11 | 1.25  | 1.69  |
| NM_001009936 | <i>PHF19</i>        | 2.10 | 2.10  | 1.00  |
| NM_024807    | <i>TREML2</i>       | 2.09 | 3.46  | -1.65 |
| NM_001177996 | <i>FAM109A</i>      | 2.09 | 3.24  | -1.55 |
| NM_018455    | <i>CENPN</i>        | 2.08 | 2.06  | 1.01  |
| NM_024061    | <i>ZNF655</i>       | 2.08 | 1.31  | 1.59  |
| NM_001164489 | <i>ADAM8</i>        | 2.08 | 1.06  | 1.97  |
| NM_001190482 | <i>PCSK5</i>        | 2.08 | 5.20  | -2.50 |
| NM_002183.1  | <i>IL3RA</i>        | 2.08 | 3.89  | -1.87 |
| NM_152329    | <i>LRR1</i>         | 2.08 | 1.05  | 1.99  |
| NM_001177676 | <i>GPR68</i>        | 2.07 | 3.94  | -1.90 |
| NM_203418    | <i>RCAN1</i>        | 2.06 | 1.59  | 1.30  |

|              |                 |      |       |       |
|--------------|-----------------|------|-------|-------|
| NM_173564    | <i>NYAP1</i>    | 2.06 | 2.06  | 1.00  |
| NM_006200    | <i>PCSK5</i>    | 2.06 | 4.26  | -2.07 |
| NM_001682    | <i>ATP2B1</i>   | 2.06 | 2.89  | -1.40 |
| NM_005539    | <i>INPP5A</i>   | 2.06 | 1.51  | 1.36  |
| NM_004834    | <i>MAP4K4</i>   | 2.05 | 2.57  | -1.25 |
| NM_001083908 | <i>DNAAF2</i>   | 2.05 | -1.45 | 2.97  |
| NM_138983    | <i>OLIG1</i>    | 2.05 | 3.15  | -1.54 |
| NM_000064    | <i>C3</i>       | 2.05 | 4.20  | -2.05 |
| NM_001012634 | <i>IL32</i>     | 2.04 | 1.60  | 1.27  |
| NM_014971    | <i>EFR3B</i>    | 2.04 | 5.38  | -2.63 |
| NM_000376    | <i>VDR</i>      | 2.04 | 2.86  | -1.40 |
| NM_001164751 | <i>ASPH</i>     | 2.04 | -1.32 | 2.70  |
| NM_001193621 | <i>PINLYP</i>   | 2.04 | 3.12  | -1.54 |
| NM_173341    | <i>PHF7</i>     | 2.03 | 1.12  | 1.82  |
| NM_001199382 | <i>RNF145</i>   | 2.03 | -1.48 | 3.01  |
| NM_014448    | <i>ARHGEF16</i> | 2.03 | 2.15  | -1.06 |
| NM_004415    | <i>DSP</i>      | 2.03 | 6.09  | -3.00 |
| NM_004186    | <i>SEMA3F</i>   | 2.03 | 2.03  | 1.00  |
| NM_002528    | <i>NTHL1</i>    | 2.03 | 2.45  | -1.21 |
| NM_001185074 | <i>ZCCHC6</i>   | 2.02 | 2.53  | -1.25 |
| NM_001012759 | <i>CTU2</i>     | 2.02 | 1.34  | 1.51  |
| NR_073090    | <i>MEAF6</i>    | 2.02 | 2.60  | -1.29 |
| NM_152286    | <i>PNPLA7</i>   | 2.02 | 3.34  | -1.66 |
| NM_005875    | <i>EIF1B</i>    | 2.01 | 1.85  | 1.09  |
| NM_003786    | <i>ABCC3</i>    | 2.01 | 2.80  | -1.39 |
| NM_003897    | <i>IER3</i>     | 2.01 | 1.51  | 1.34  |
| NM_005491    | <i>MAMLD1</i>   | 2.01 | 6.42  | -3.19 |
| NM_001142761 | <i>KNSTRN</i>   | 2.01 | 2.21  | -1.10 |
| NM_015723    | <i>PNPLA8</i>   | 2.01 | 2.90  | -1.45 |
| NM_001258210 | <i>TSKU</i>     | 2.00 | 7.12  | -3.55 |
| NM_000903    | <i>NQO1</i>     | 2.00 | 1.47  | 1.36  |
| NM_001128826 | <i>NCS1</i>     | 2.00 | 2.69  | -1.34 |
| NM_001126111 | <i>OSGIN2</i>   | 2.00 | 2.16  | -1.08 |
| NM_023948    | <i>MOSPD3</i>   | 1.99 | 2.59  | -1.30 |
| NM_003693    | <i>SCARF1</i>   | 1.99 | 2.62  | -1.32 |
| NM_002183    | <i>IL3RA</i>    | 1.99 | 3.86  | -1.94 |
| NM_001032283 | <i>TMPO</i>     | 1.98 | 2.69  | -1.36 |
| NM_001029864 | <i>KIAA1755</i> | 1.97 | 6.95  | -3.53 |
| NM_001126104 | <i>RACGAP1</i>  | 1.96 | 2.34  | -1.19 |
| NM_001943    | <i>DSG2</i>     | 1.96 | 2.95  | -1.51 |

|              |                 |      |       |       |
|--------------|-----------------|------|-------|-------|
| NM_001242559 | <i>MAP4K4</i>   | 1.94 | 3.27  | -1.68 |
| NM_153690    | <i>FAM43A</i>   | 1.94 | 4.49  | -2.31 |
| NR_036440    | <i>POU5F1P3</i> | 1.94 | 2.11  | -1.09 |
| NM_001712    | <i>CEACAM1</i>  | 1.94 | 4.04  | -2.08 |
| NM_001013838 | <i>RLTPR</i>    | 1.94 | 2.85  | -1.47 |
| NM_000435    | <i>NOTCH3</i>   | 1.93 | 5.99  | -3.10 |
| NM_174955    | <i>ATP2A3</i>   | 1.93 | 3.19  | -1.66 |
| NM_006000    | <i>TUBA4A</i>   | 1.92 | 2.70  | -1.40 |
| NM_016250    | <i>NDRG2</i>    | 1.92 | 2.43  | -1.27 |
| NM_001005176 | <i>SP140</i>    | 1.92 | 2.28  | -1.19 |
| NM_017596    | <i>KIF21B</i>   | 1.91 | 2.59  | -1.35 |
| NM_001827    | <i>CKS2</i>     | 1.90 | 2.47  | -1.30 |
| NM_001271856 | <i>GRASP</i>    | 1.90 | 3.55  | -1.86 |
| NM_007028.7  | <i>TRIM31</i>   | 1.90 | 7.84  | -4.13 |
| NM_001130026 | <i>FAM115C</i>  | 1.90 | -2.55 | 4.84  |
| NM_014468    | <i>VENTX</i>    | 1.90 | 2.23  | -1.18 |
| NM_020343    | <i>RALGAPA2</i> | 1.89 | 2.37  | -1.25 |
| NM_003276    | <i>TMPO</i>     | 1.89 | 2.47  | -1.31 |
| NM_001099286 | <i>MTFR2</i>    | 1.89 | 2.25  | -1.19 |
| NM_174954    | <i>ATP2A3</i>   | 1.88 | 3.24  | -1.72 |
| NM_173528    | <i>C15orf26</i> | 1.88 | 2.17  | -1.15 |
| NM_001017535 | <i>VDR</i>      | 1.87 | 2.80  | -1.50 |
| NM_199002    | <i>ARHGEF1</i>  | 1.87 | 2.56  | -1.37 |
| NM_030929    | <i>KAZALD1</i>  | 1.87 | 2.47  | -1.32 |
| NM_001135242 | <i>NDRG1</i>    | 1.86 | 2.77  | -1.49 |
| NM_002438.1  | <i>MRC1</i>     | 1.86 | 7.35  | -3.96 |
| NM_018387    | <i>STRBP</i>    | 1.86 | 4.03  | -2.17 |
| NM_001252100 | <i>KIF21B</i>   | 1.86 | 2.16  | -1.17 |
| NM_006716    | <i>DBF4</i>     | 1.85 | 2.26  | -1.22 |
| NM_005173    | <i>ATP2A3</i>   | 1.85 | 2.60  | -1.41 |
| NM_000379    | <i>XDH</i>      | 1.84 | 3.07  | -1.66 |
| NM_004418    | <i>DUSP2</i>    | 1.84 | 5.11  | -2.77 |
| NM_001256105 | <i>WNT5A</i>    | 1.84 | 3.18  | -1.73 |
| NM_004844    | <i>SH3BP5</i>   | 1.84 | 3.08  | -1.68 |
| NR_073104    | <i>ITGA2</i>    | 1.84 | 2.34  | -1.27 |
| NM_001270691 | <i>SMOX</i>     | 1.84 | 2.75  | -1.50 |
| NM_001037330 | <i>TRIM16L</i>  | 1.83 | 2.21  | -1.21 |
| NM_174953    | <i>ATP2A3</i>   | 1.83 | 3.14  | -1.71 |
| NM_001008723 | <i>CCDC147</i>  | 1.82 | 2.04  | -1.12 |
| NM_033105    | <i>DNAJC5B</i>  | 1.82 | 3.33  | -1.83 |

|              |                  |      |        |       |
|--------------|------------------|------|--------|-------|
| NM_001145525 | <i>RAI14</i>     | 1.82 | 2.47   | -1.35 |
| NM_002162    | <i>ICAM3</i>     | 1.82 | 4.32   | -2.37 |
| NM_174956    | <i>ATP2A3</i>    | 1.82 | 3.01   | -1.65 |
| NM_033141    | <i>MAP3K9</i>    | 1.81 | 2.45   | -1.35 |
| NM_032744    | <i>ADTRP</i>     | 1.81 | 2.68   | -1.48 |
| NM_001003702 | <i>ARHGEF35</i>  | 1.81 | 3.68   | -2.03 |
| NM_025153    | <i>ATP10B</i>    | 1.81 | 2.78   | -1.54 |
| NM_152292    | <i>TRMT10A</i>   | 1.80 | 2.41   | -1.34 |
| NM_000906    | <i>NPR1</i>      | 1.79 | 4.55   | -2.54 |
| NM_001079882 | <i>PRKD2</i>     | 1.79 | 2.38   | -1.33 |
| NM_020698    | <i>TMCC3</i>     | 1.79 | 3.56   | -2.00 |
| NM_015111    | <i>N4BP3</i>     | 1.78 | 3.33   | -1.87 |
| NM_002933    | <i>RNASE1</i>    | 1.78 | -11.59 | 20.65 |
| NM_001128922 | <i>LRRC32</i>    | 1.78 | 6.97   | -3.92 |
| NM_004252    | <i>SLC9A3R1</i>  | 1.78 | 2.12   | -1.19 |
| NM_003174    | <i>SVIL</i>      | 1.78 | 3.03   | -1.71 |
| NM_002438    | <i>MRC1</i>      | 1.78 | 7.77   | -4.37 |
| NM_181640    | <i>CKLF</i>      | 1.76 | 2.01   | -1.14 |
| NM_001018009 | <i>SH3BP5</i>    | 1.76 | 3.27   | -1.86 |
| NM_001161573 | <i>MAFF</i>      | 1.76 | 2.25   | -1.28 |
| NM_001100164 | <i>PHACTR2</i>   | 1.75 | 2.02   | -1.15 |
| NM_001628    | <i>AKR1B1</i>    | 1.75 | 2.18   | -1.24 |
| NM_002981    | <i>CCL1</i>      | 1.75 | 15.21  | -8.71 |
| NM_017705    | <i>PAQR5</i>     | 1.75 | 2.72   | -1.56 |
| NM_001040457 | <i>RHBDD2</i>    | 1.75 | 3.08   | -1.76 |
| NM_014059    | <i>RGCC</i>      | 1.74 | 3.94   | -2.26 |
| NM_182705    | <i>FAM101B</i>   | 1.74 | 4.31   | -2.48 |
| NR_073039    | <i>MDK</i>       | 1.73 | 4.21   | -2.43 |
| NM_178452    | <i>DNAAF1</i>    | 1.73 | 3.34   | -1.93 |
| NM_000920    | <i>PC</i>        | 1.73 | 2.03   | -1.17 |
| NM_004878    | <i>PTGES</i>     | 1.72 | 5.02   | -2.92 |
| NM_007237    | <i>SP140</i>     | 1.71 | 2.29   | -1.34 |
| NM_002659    | <i>PLAUR</i>     | 1.71 | 2.30   | -1.35 |
| NR_027237    | <i>LOC728743</i> | 1.71 | 2.50   | -1.47 |
| NM_001025195 | <i>CES1</i>      | 1.71 | 7.20   | -4.22 |
| NM_006504    | <i>PTPRE</i>     | 1.70 | 2.22   | -1.31 |
| NM_016246    | <i>HSD17B14</i>  | 1.70 | 2.28   | -1.34 |
| NR_027383    | <i>AKAP17A</i>   | 1.69 | 2.52   | -1.49 |
| NM_016951    | <i>CKLF</i>      | 1.69 | 2.27   | -1.34 |
| NM_202001    | <i>ERCC1</i>     | 1.68 | 2.20   | -1.31 |

|              |                 |      |       |       |
|--------------|-----------------|------|-------|-------|
| NM_145899    | <i>HMGA1</i>    | 1.68 | 2.20  | -1.31 |
| NM_203434    | <i>IER5L</i>    | 1.68 | 2.55  | -1.52 |
| NM_004669    | <i>CLIC3</i>    | 1.68 | 2.25  | -1.35 |
| NM_018660    | <i>ZNF395</i>   | 1.67 | -2.00 | 3.36  |
| NM_001076682 | <i>NCAM1</i>    | 1.67 | 2.07  | -1.24 |
| NM_001024212 | <i>S100A13</i>  | 1.67 | 3.97  | -2.38 |
| NM_002872    | <i>RAC2</i>     | 1.66 | 4.24  | -2.56 |
| NM_015302    | <i>HAUS5</i>    | 1.66 | 2.11  | -1.27 |
| NM_001945    | <i>HBEGF</i>    | 1.65 | 6.67  | -4.03 |
| NM_032521    | <i>PARD6B</i>   | 1.65 | 2.75  | -1.67 |
| NM_007317    | <i>KIF22</i>    | 1.62 | 2.09  | -1.29 |
| NM_001130688 | <i>HMGB2</i>    | 1.62 | 3.30  | -2.04 |
| NM_006866    | <i>LILRA2</i>   | 1.62 | 2.62  | -1.62 |
| NM_001040716 | <i>PC</i>       | 1.61 | 2.45  | -1.52 |
| NM_001135699 | <i>YWHAZ</i>    | 1.61 | 2.11  | -1.31 |
| NM_001100819 | <i>MOB4</i>     | 1.61 | -2.25 | 3.62  |
| NM_198275    | <i>MPZL3</i>    | 1.61 | 2.70  | -1.68 |
| NM_000922    | <i>PDE3B</i>    | 1.60 | 2.98  | -1.86 |
| NR_027157    | <i>TMPO-AS1</i> | 1.60 | 2.01  | -1.25 |
| NM_001134830 | <i>AHI1</i>     | 1.60 | 3.87  | -2.42 |
| NM_001024809 | <i>RARA</i>     | 1.60 | 2.33  | -1.46 |
| NM_001805    | <i>CEBPE</i>    | 1.60 | 3.10  | -1.94 |
| NM_002990    | <i>CCL22</i>    | 1.60 | 6.52  | -4.08 |
| NM_138434    | <i>C7orf29</i>  | 1.59 | 3.11  | -1.95 |
| NM_053056    | <i>CCND1</i>    | 1.59 | 2.56  | -1.61 |
| NM_006022    | <i>TSC22D1</i>  | 1.59 | 2.19  | -1.38 |
| NM_000606    | <i>C8G</i>      | 1.59 | 2.47  | -1.55 |
| NM_080725    | <i>SRXN1</i>    | 1.59 | 2.01  | -1.27 |
| NM_012216    | <i>MID2</i>     | 1.58 | 4.46  | -2.82 |
| NM_014210    | <i>EVI2A</i>    | 1.58 | 2.46  | -1.56 |
| NM_001136050 | <i>DHRS1</i>    | 1.58 | 2.16  | -1.37 |
| NM_018690    | <i>APOBR</i>    | 1.57 | 2.83  | -1.80 |
| NM_001025159 | <i>CD74</i>     | 1.57 | 2.20  | -1.41 |
| NM_022481    | <i>ARAP3</i>    | 1.56 | 3.05  | -1.95 |
| NM_006599    | <i>NFAT5</i>    | 1.56 | 2.36  | -1.51 |
| NM_152445    | <i>FAM161B</i>  | 1.56 | 2.22  | -1.42 |
| NM_001145426 | <i>CSDA</i>     | 1.56 | -2.67 | 4.17  |
| NM_024761    | <i>MOB3B</i>    | 1.56 | 2.20  | -1.41 |
| NM_004900    | <i>APOBEC3B</i> | 1.56 | 3.32  | -2.13 |
| NM_178229    | <i>IQGAP3</i>   | 1.55 | 2.41  | -1.55 |

|              |                  |      |       |       |
|--------------|------------------|------|-------|-------|
| NM_006404    | <i>PROCR</i>     | 1.55 | 2.18  | -1.41 |
| NM_002738    | <i>PRKCB</i>     | 1.55 | 2.35  | -1.52 |
| NM_172037    | <i>RDH10</i>     | 1.55 | 2.37  | -1.53 |
| NM_000804    | <i>FOLR3</i>     | 1.55 | 2.62  | -1.69 |
| NM_003364    | <i>UPP1</i>      | 1.55 | 2.21  | -1.43 |
| NM_001823    | <i>CKB</i>       | 1.54 | 2.79  | -1.80 |
| NM_004951    | <i>GPR183</i>    | 1.54 | -2.12 | 3.27  |
| NM_197947    | <i>CLEC7A</i>    | 1.53 | 2.30  | -1.51 |
| NM_000103    | <i>CYP19A1</i>   | 1.53 | 2.68  | -1.76 |
| NM_005417    | <i>SRC</i>       | 1.53 | 2.00  | -1.31 |
| NM_002569    | <i>FURIN</i>     | 1.52 | 2.03  | -1.33 |
| NM_002192    | <i>INHBA</i>     | 1.50 | 3.61  | -2.40 |
| NM_138639    | <i>BCL2L12</i>   | 1.50 | 2.24  | -1.49 |
| NM_003749    | <i>IRS2</i>      | 1.50 | 2.54  | -1.69 |
| NM_005498    | <i>AP1M2</i>     | 1.50 | 5.10  | -3.40 |
| NM_000507    | <i>FBP1</i>      | 1.50 | 5.89  | -3.94 |
| NM_003689    | <i>AKR7A2</i>    | 1.49 | 2.18  | -1.46 |
| NM_018944    | <i>MIS18A</i>    | 1.49 | 2.50  | -1.67 |
| NM_004355    | <i>CD74</i>      | 1.49 | 2.08  | -1.39 |
| NM_001817    | <i>CEACAM4</i>   | 1.49 | -2.31 | 3.43  |
| NM_019111.2  | <i>HLA-DRA</i>   | 1.49 | 2.33  | -1.57 |
| NM_145109    | <i>MAP2K3</i>    | 1.48 | 2.54  | -1.71 |
| NM_001947    | <i>DUSP7</i>     | 1.48 | 2.71  | -1.83 |
| NM_004882    | <i>CIR1</i>      | 1.48 | 2.13  | -1.44 |
| NM_004227    | <i>CYTH3</i>     | 1.48 | 2.41  | -1.63 |
| NM_006403    | <i>NEDD9</i>     | 1.48 | 3.51  | -2.38 |
| NM_024832    | <i>RIN3</i>      | 1.47 | 2.02  | -1.38 |
| NR_038386    | <i>LOC728537</i> | 1.47 | 2.76  | -1.88 |
| NM_002754    | <i>MAPK13</i>    | 1.47 | 2.10  | -1.43 |
| NM_001025194 | <i>CES1</i>      | 1.46 | 5.81  | -3.97 |
| NM_003390    | <i>WEE1</i>      | 1.46 | 2.70  | -1.84 |
| NM_002615    | <i>SERPINF1</i>  | 1.46 | -2.14 | 3.13  |
| NR_028492    | <i>CFL1P1</i>    | 1.46 | 2.85  | -1.95 |
| NM_003887    | <i>ASAP2</i>     | 1.46 | 3.67  | -2.51 |
| NM_015516    | <i>TSKU</i>      | 1.45 | 6.13  | -4.22 |
| NM_001206798 | <i>PKM</i>       | 1.45 | 2.16  | -1.49 |
| NR_003276    | <i>CES1P1</i>    | 1.44 | 3.15  | -2.18 |
| NM_024103    | <i>SLC25A23</i>  | 1.44 | 2.66  | -1.85 |
| NM_001130982 | <i>DYSF</i>      | 1.44 | 2.16  | -1.50 |
| NM_001145290 | <i>SLC37A2</i>   | 1.43 | 4.68  | -3.27 |

|              |                  |      |       |       |
|--------------|------------------|------|-------|-------|
| NM_017873    | <i>ASB6</i>      | 1.43 | 2.01  | -1.40 |
| NM_053064    | <i>GNG2</i>      | 1.43 | 5.02  | -3.51 |
| NM_022833    | <i>FAM129B</i>   | 1.43 | 2.18  | -1.53 |
| NM_002125    | <i>HLA-DRB5</i>  | 1.42 | 2.40  | -1.69 |
| NM_015864    | <i>FAM65B</i>    | 1.41 | 3.14  | -2.22 |
| NM_020225    | <i>STOX2</i>     | 1.41 | 2.41  | -1.71 |
| NM_007297    | <i>BRCA1</i>     | 1.41 | 2.72  | -1.93 |
| NM_080548    | <i>PTPN6</i>     | 1.40 | 2.49  | -1.78 |
| NM_001256153 | <i>ALOX5</i>     | 1.40 | 5.47  | -3.90 |
| NM_002124.1  | <i>HLA-DRB1</i>  | 1.40 | 2.21  | -1.58 |
| NM_022047    | <i>DEF6</i>      | 1.40 | 2.48  | -1.77 |
| NM_152362    | <i>TNFAIP8L1</i> | 1.40 | 2.25  | -1.60 |
| NM_001198525 | <i>TCF7L2</i>    | 1.40 | 4.73  | -3.38 |
| NM_017957    | <i>EPN3</i>      | 1.40 | 2.06  | -1.48 |
| NM_014862    | <i>ARNT2</i>     | 1.40 | -4.11 | 5.74  |
| NM_015104    | <i>ATG2A</i>     | 1.39 | 2.19  | -1.57 |
| NM_001111307 | <i>PDE4A</i>     | 1.39 | 3.88  | -2.79 |
| NM_001040118 | <i>ARAP1</i>     | 1.39 | 2.17  | -1.56 |
| NM_001145033 | <i>C11orf96</i>  | 1.39 | -3.97 | 5.50  |
| NM_000164    | <i>GIPR</i>      | 1.38 | 4.79  | -3.46 |
| NM_032348    | <i>MXRA8</i>     | 1.38 | 2.08  | -1.51 |
| NR_027136    | <i>C1orf126</i>  | 1.38 | 2.91  | -2.11 |
| NM_212535    | <i>PRKCB</i>     | 1.38 | 2.20  | -1.59 |
| NM_001167942 | <i>TNFAIP8L1</i> | 1.38 | 2.24  | -1.63 |
| NM_001127628 | <i>FBP1</i>      | 1.38 | 7.40  | -5.38 |
| NM_000399    | <i>EGR2</i>      | 1.38 | 2.70  | -1.97 |
| NM_016112    | <i>PKD2L1</i>    | 1.38 | 2.88  | -2.10 |
| NM_020645    | <i>NRIP3</i>     | 1.37 | 2.02  | -1.47 |
| NM_032047    | <i>B3GNT5</i>    | 1.37 | 2.10  | -1.53 |
| NM_021965    | <i>PGM5</i>      | 1.36 | 3.40  | -2.49 |
| NR_027673    | <i>ADARB1</i>    | 1.36 | -2.56 | 3.49  |
| NM_004395    | <i>DBN1</i>      | 1.36 | 3.43  | -2.52 |
| NM_001164540 | <i>DISC1</i>     | 1.36 | -2.06 | 2.80  |
| NM_005231    | <i>CTTN</i>      | 1.36 | 3.06  | -2.26 |
| NM_173214    | <i>NFAT5</i>     | 1.35 | 2.07  | -1.53 |
| NM_002121.4  | <i>HLA-DPB1</i>  | 1.35 | 2.39  | -1.77 |
| NM_018249    | <i>CDK5RAP2</i>  | 1.35 | 2.13  | -1.58 |
| NM_001171    | <i>ABCC6</i>     | 1.35 | 2.37  | -1.76 |
| NM_001248004 | <i>ARNTL2</i>    | 1.35 | -2.77 | 3.73  |
| NM_000218    | <i>KCNQ1</i>     | 1.35 | 2.85  | -2.12 |

|              |                  |      |       |       |
|--------------|------------------|------|-------|-------|
| NM_001085465 | <i>CTNND1</i>    | 1.35 | 2.14  | -1.59 |
| NM_080430    | <i>SELM</i>      | 1.35 | -2.29 | 3.08  |
| NM_033554.1  | <i>HLA-DPA1</i>  | 1.34 | 2.15  | -1.60 |
| NM_007057    | <i>ZWINT</i>     | 1.34 | 3.30  | -2.46 |
| NM_001677    | <i>ATP1B1</i>    | 1.33 | 2.50  | -1.88 |
| NM_001256849 | <i>POLD1</i>     | 1.33 | 2.39  | -1.80 |
| NM_003596    | <i>TPST1</i>     | 1.33 | -2.89 | 3.84  |
| NM_000433    | <i>NCF2</i>      | 1.33 | 2.31  | -1.74 |
| NM_003036    | <i>SKI</i>       | 1.32 | 2.36  | -1.78 |
| NR_046386    | <i>UHRF2</i>     | 1.32 | -2.23 | 2.95  |
| NM_007030    | <i>TPPP</i>      | 1.32 | 3.00  | -2.27 |
| NM_015376    | <i>RASGRP3</i>   | 1.32 | 4.11  | -3.11 |
| NM_000067    | <i>CA2</i>       | 1.32 | 4.90  | -3.72 |
| NM_001127398 | <i>ERLEC1</i>    | 1.32 | 2.77  | -2.10 |
| NM_002084    | <i>GPX3</i>      | 1.31 | 2.71  | -2.06 |
| NM_021724    | <i>NR1D1</i>     | 1.31 | 2.51  | -1.91 |
| NM_001166276 | <i>ARHGAP25</i>  | 1.31 | 3.62  | -2.76 |
| NM_032932    | <i>RAB11FIP4</i> | 1.31 | 2.71  | -2.06 |
| NM_005944    | <i>CD200</i>     | 1.31 | -3.17 | 4.16  |
| NM_001270615 | <i>DEDD2</i>     | 1.31 | 2.07  | -1.58 |
| NM_144635    | <i>FAM131A</i>   | 1.31 | 2.36  | -1.81 |
| NM_003713    | <i>PPAP2B</i>    | 1.31 | 2.08  | -1.59 |
| NM_024659    | <i>GTDC1</i>     | 1.30 | -2.45 | 3.20  |
| NM_017421    | <i>COQ3</i>      | 1.30 | 2.17  | -1.67 |
| NM_001267709 | <i>ZNF706</i>    | 1.30 | 2.49  | -1.91 |
| NR_038111    | <i>SNHG16</i>    | 1.30 | 2.16  | -1.66 |
| NM_001004105 | <i>GRK6</i>      | 1.30 | 2.14  | -1.65 |
| NM_030776    | <i>ZBP1</i>      | 1.29 | 4.68  | -3.61 |
| NM_001035254 | <i>FAM102A</i>   | 1.29 | 2.28  | -1.76 |
| NM_001033555 | <i>SPECC1</i>    | 1.29 | 2.85  | -2.21 |
| NR_027381    | <i>RDH13</i>     | 1.28 | 2.65  | -2.06 |
| NM_175900    | <i>C16orf54</i>  | 1.28 | 2.53  | -1.97 |
| NM_006495    | <i>EVI2B</i>     | 1.28 | 2.08  | -1.62 |
| NM_002998    | <i>SDC2</i>      | 1.28 | 2.34  | -1.83 |
| NM_001190789 | <i>NCF2</i>      | 1.27 | 2.38  | -1.87 |
| NM_001220769 | <i>IKZF1</i>     | 1.27 | -2.00 | 2.54  |
| NM_015627    | <i>LDLRAP1</i>   | 1.27 | 2.05  | -1.62 |
| NM_145655    | <i>GCNT2</i>     | 1.26 | 2.15  | -1.70 |
| NM_001271629 | <i>MEF2D</i>     | 1.26 | 2.13  | -1.68 |
| NM_021070    | <i>LTBP3</i>     | 1.26 | 3.59  | -2.84 |

|                |                   |      |       |       |
|----------------|-------------------|------|-------|-------|
| NM_002118.5    | <i>HLA-DMB</i>    | 1.26 | 2.80  | -2.23 |
| NM_198044      | <i>ZDHHC16</i>    | 1.26 | -2.49 | 3.13  |
| NM_001142928   | <i>LRRC61</i>     | 1.25 | 2.08  | -1.67 |
| NM_001040217   | <i>FAM63A</i>     | 1.25 | 2.12  | -1.70 |
| NM_001193484   | <i>LIMS1</i>      | 1.25 | 2.02  | -1.62 |
| NM_001100624   | <i>CENPN</i>      | 1.25 | 2.82  | -2.27 |
| NM_021224      | <i>ZNF462</i>     | 1.25 | -3.06 | 3.82  |
| NM_016183      | <i>MRT04</i>      | 1.24 | 2.15  | -1.73 |
| NM_001190267   | <i>ATG16L1</i>    | 1.24 | -2.03 | 2.52  |
| NM_020786      | <i>PDP2</i>       | 1.24 | 2.43  | -1.96 |
| NM_001204108   | <i>BCL2L11</i>    | 1.24 | -2.76 | 3.42  |
| NM_006456      | <i>ST6GALNAC2</i> | 1.24 | 2.64  | -2.13 |
| NM_177551      | <i>HCAR2</i>      | 1.24 | 4.04  | -3.27 |
| NM_001242525.3 | <i>HLA-DPA1</i>   | 1.24 | 2.14  | -1.73 |
| NR_015421      | <i>LOC154761</i>  | 1.23 | -4.14 | 5.09  |
| NM_145263      | <i>SPATA18</i>    | 1.23 | 2.77  | -2.26 |
| NM_133463      | <i>AMZ1</i>       | 1.23 | 2.46  | -2.01 |
| NM_001266      | <i>CES1</i>       | 1.22 | 5.35  | -4.38 |
| NM_002115      | <i>HK3</i>        | 1.22 | 2.36  | -1.93 |
| NM_003955      | <i>SOCS3</i>      | 1.22 | -2.21 | 2.69  |
| NM_001085464   | <i>CTNND1</i>     | 1.22 | 2.21  | -1.81 |
| NM_001085463   | <i>CTNND1</i>     | 1.21 | 2.30  | -1.90 |
| NR_051978      | <i>TBC1D2</i>     | 1.21 | 2.38  | -1.97 |
| NM_001109974   | <i>SYNPO</i>      | 1.21 | -4.95 | 5.99  |
| NR_052852      | <i>MARCKSL1</i>   | 1.21 | -2.45 | 2.96  |
| NM_001206886   | <i>CTNND1</i>     | 1.21 | 2.22  | -1.84 |
| NM_018843      | <i>SLC25A40</i>   | 1.21 | 2.17  | -1.80 |
| NM_182898      | <i>CREB5</i>      | 1.20 | 2.19  | -1.82 |
| NM_198595      | <i>AFAP1</i>      | 1.20 | -2.29 | 2.75  |
| NM_001171088   | <i>CLCN2</i>      | 1.20 | 2.84  | -2.37 |
| NR_047545      | <i>LMNA</i>       | 1.19 | 2.33  | -1.95 |
| NM_001130420   | <i>SMARCC2</i>    | 1.19 | -2.16 | 2.58  |
| NM_000638      | <i>VTN</i>        | 1.19 | -2.48 | 2.95  |
| NM_033334      | <i>NR6A1</i>      | 1.19 | -2.89 | 3.44  |
| NM_001206883   | <i>CTNND1</i>     | 1.19 | 2.36  | -1.99 |
| NM_205842      | <i>NCKAP1</i>     | 1.18 | 3.13  | -2.64 |
| NM_001270941   | <i>JAKMIP2</i>    | 1.18 | 4.29  | -3.64 |
| NM_133261      | <i>GIPC3</i>      | 1.17 | 2.77  | -2.36 |
| NM_001193523   | <i>FAM65A</i>     | 1.17 | 2.10  | -1.80 |
| NM_181597      | <i>UPP1</i>       | 1.17 | 2.11  | -1.81 |

|              |                   |      |       |       |
|--------------|-------------------|------|-------|-------|
| NM_022304    | <i>HRH2</i>       | 1.16 | -2.95 | 3.44  |
| NM_006869    | <i>ADAP1</i>      | 1.16 | 2.29  | -1.98 |
| NM_003214    | <i>TEAD3</i>      | 1.16 | 4.53  | -3.91 |
| NM_213636    | <i>PDLIM7</i>     | 1.16 | 2.71  | -2.34 |
| NM_001012968 | <i>SPIN4</i>      | 1.16 | 2.85  | -2.46 |
| NR_003187    | <i>NCF1C</i>      | 1.16 | 2.10  | -1.82 |
| NM_020443    | <i>NAV1</i>       | 1.15 | -2.53 | 2.92  |
| NR_046336    | <i>FAM193A</i>    | 1.15 | -2.86 | 3.29  |
| NM_012201    | <i>GLG1</i>       | 1.14 | -2.89 | 3.31  |
| NM_005110    | <i>GFPT2</i>      | 1.14 | -6.72 | 7.66  |
| NM_001878    | <i>CRABP2</i>     | 1.14 | 7.56  | -6.64 |
| NM_004417    | <i>DUSP1</i>      | 1.13 | -2.10 | 2.38  |
| NM_033254    | <i>BOC</i>        | 1.13 | -2.61 | 2.95  |
| NM_203352    | <i>PDLIM7</i>     | 1.13 | 2.51  | -2.22 |
| NM_001166271 | <i>SPATA13</i>    | 1.13 | 4.49  | -3.97 |
| NM_001127651 | <i>NCF2</i>       | 1.13 | 2.67  | -2.36 |
| NM_001145642 | <i>KIAA0226</i>   | 1.13 | 2.28  | -2.02 |
| NM_002119.6  | <i>HLA-DOA</i>    | 1.12 | 3.01  | -2.69 |
| NM_000239    | <i>LYZ</i>        | 1.12 | 2.49  | -2.23 |
| NM_000265    | <i>NCF1</i>       | 1.12 | 2.18  | -1.96 |
| NM_021922    | <i>FANCE</i>      | 1.12 | 3.23  | -2.89 |
| NM_001033053 | <i>NLRP1</i>      | 1.11 | 2.45  | -2.20 |
| NR_037669    | <i>GGCT</i>       | 1.11 | -2.43 | 2.69  |
| NM_001256370 | <i>SAMSN1</i>     | 1.11 | -4.24 | 4.71  |
| NM_014790    | <i>JAKMIP2</i>    | 1.11 | 2.85  | -2.57 |
| NM_020219    | <i>CEACAM19</i>   | 1.11 | -2.65 | 2.94  |
| NR_027118    | <i>INHBA-AS1</i>  | 1.10 | 2.46  | -2.23 |
| NM_002914    | <i>RFC2</i>       | 1.10 | -2.50 | 2.73  |
| NM_015316    | <i>PPP1R13B</i>   | 1.09 | 2.50  | -2.29 |
| NM_171825    | <i>CAMK2A</i>     | 1.08 | -3.69 | 4.00  |
| NM_003612    | <i>SEMA7A</i>     | 1.08 | 4.41  | -4.07 |
| NM_001190794 | <i>NCF2</i>       | 1.08 | 2.17  | -2.01 |
| NM_032855    | <i>HSH2D</i>      | 1.08 | 2.11  | -1.96 |
| NM_006287    | <i>TFPI</i>       | 1.07 | -2.37 | 2.54  |
| NM_001253837 | <i>PKD2L1</i>     | 1.07 | 2.05  | -1.91 |
| NM_001080855 | <i>PXN</i>        | 1.07 | 2.33  | -2.18 |
| NR_033842    | <i>TMEM72-AS1</i> | 1.07 | -2.20 | 2.35  |
| NM_000698    | <i>ALOX5</i>      | 1.07 | 5.91  | -5.54 |
| NM_005451    | <i>PDLIM7</i>     | 1.06 | 2.65  | -2.49 |
| NM_001270467 | <i>SOCS2</i>      | 1.06 | -3.75 | 3.97  |

|                |                  |       |       |       |
|----------------|------------------|-------|-------|-------|
| NM_001171816   | <i>RNF166</i>    | 1.06  | 2.07  | -1.96 |
| NM_032784      | <i>RSPO3</i>     | 1.05  | 3.14  | -2.98 |
| NM_001197293   | <i>DPYSL2</i>    | 1.05  | -2.46 | 2.59  |
| NM_001629      | <i>ALOX5AP</i>   | 1.05  | 9.70  | -9.26 |
| NM_001135769   | <i>PVR</i>       | 1.05  | -2.54 | 2.66  |
| NM_012413      | <i>QPCT</i>      | 1.04  | 3.69  | -3.53 |
| NM_016518      | <i>PIPOX</i>     | 1.04  | 3.56  | -3.42 |
| NM_001060      | <i>TBXA2R</i>    | 1.03  | 2.48  | -2.40 |
| NM_001261414   | <i>SOX5</i>      | 1.03  | -3.42 | 3.53  |
| NM_199070      | <i>NDUFAF3</i>   | 1.03  | -2.06 | 2.12  |
| NM_138360      | <i>LRRC16B</i>   | 1.03  | 3.88  | -3.77 |
| NM_001127244   | <i>LRRC8A</i>    | 1.03  | 2.38  | -2.31 |
| NM_001725      | <i>BPI</i>       | 1.03  | 2.91  | -2.83 |
| NM_001010855   | <i>PIK3R6</i>    | 1.02  | 2.21  | -2.15 |
| NM_007021      | <i>C10orf10</i>  | 1.02  | -2.27 | 2.33  |
| NM_001172699   | <i>PPARGC1B</i>  | 1.02  | 2.62  | -2.56 |
| NM_005114      | <i>HS3ST1</i>    | 1.02  | -4.88 | 4.99  |
| NM_006095      | <i>ATP8A1</i>    | 1.02  | -2.10 | 2.15  |
| NM_173505      | <i>ANKRD29</i>   | 1.01  | 2.13  | -2.10 |
| NM_001257281   | <i>DIS3L2</i>    | 1.01  | -2.33 | 2.36  |
| NM_002610      | <i>PDK1</i>      | 1.01  | -2.24 | 2.26  |
| NM_001135770   | <i>PVR</i>       | 1.01  | -2.35 | 2.37  |
| NM_022136      | <i>SAMSN1</i>    | 1.01  | -2.67 | 2.70  |
| NM_001267595   | <i>SENP1</i>     | 1.01  | -2.09 | 2.12  |
| NM_181866      | <i>ACOT7</i>     | 1.00  | 3.17  | -3.16 |
| NM_003890      | <i>FCGBP</i>     | 1.00  | -5.73 | 5.73  |
| NM_182932      | <i>SLC8A3</i>    | 1.00  | -5.46 | 5.46  |
| NM_005562      | <i>LAMC2</i>     | 1.00  | -4.69 | 4.69  |
| NM_003064      | <i>SLPI</i>      | 1.00  | -4.09 | 4.09  |
| NM_012153      | <i>EHF</i>       | 1.00  | -3.63 | 3.63  |
| NM_004198      | <i>CHRNA6</i>    | 1.00  | -3.61 | 3.61  |
| NM_003116      | <i>SPAG4</i>     | 1.00  | -2.88 | 2.88  |
| NR_026656      | <i>LOC400043</i> | 1.00  | -2.70 | 2.70  |
| NM_052934      | <i>SLC26A9</i>   | 1.00  | -2.66 | 2.66  |
| NM_001142480   | <i>NREP</i>      | 1.00  | -2.02 | 2.02  |
| NM_001254952.1 | <i>ATAT1</i>     | -1.00 | -2.41 | 2.41  |
| NM_007144      | <i>PCGF2</i>     | -1.00 | 2.33  | -2.34 |
| NM_003118      | <i>SPARC</i>     | -1.01 | 2.34  | -2.36 |
| NM_015831      | <i>ACHE</i>      | -1.01 | -6.00 | 5.94  |
| NM_001177306   | <i>PAM</i>       | -1.01 | -3.42 | 3.38  |

|              |                     |       |        |       |
|--------------|---------------------|-------|--------|-------|
| NM_004566    | <i>PFKFB3</i>       | -1.02 | -4.39  | 4.32  |
| NM_001098526 | <i>AMICA1</i>       | -1.02 | 2.27   | -2.31 |
| NM_006399    | <i>BATF</i>         | -1.02 | -2.71  | 2.65  |
| NM_013227    | <i>ACAN</i>         | -1.03 | -2.72  | 2.65  |
| NM_006343    | <i>MERTK</i>        | -1.03 | -2.08  | 2.02  |
| NM_001257291 | <i>SLC9A7</i>       | -1.03 | 2.48   | -2.55 |
| NM_181351    | <i>NCAM1</i>        | -1.03 | 3.25   | -3.35 |
| NM_003629    | <i>PIK3R3</i>       | -1.03 | 2.04   | -2.10 |
| NM_015981    | <i>CAMK2A</i>       | -1.03 | -2.13  | 2.06  |
| NM_012118    | <i>CCRN4L</i>       | -1.04 | -2.18  | 2.10  |
| NM_001199037 | <i>SERINC2</i>      | -1.04 | 2.23   | -2.32 |
| NM_001025239 | <i>TSPAN4</i>       | -1.05 | -2.14  | 2.05  |
| NM_004272    | <i>HOMER1</i>       | -1.05 | 2.03   | -2.13 |
| NM_138495    | <i>ATXN7L1</i>      | -1.05 | -3.88  | 3.68  |
| NM_006862    | <i>TDRKH</i>        | -1.05 | -2.68  | 2.55  |
| NM_000930    | <i>PLAT</i>         | -1.05 | -5.44  | 5.16  |
| NM_002185    | <i>IL7R</i>         | -1.06 | -3.35  | 3.17  |
| NM_001127596 | <i>FCGR3A</i>       | -1.06 | -2.32  | 2.20  |
| NM_138463    | <i>TLCD1</i>        | -1.06 | -2.04  | 1.93  |
| NM_005165    | <i>ALDOC</i>        | -1.06 | -2.67  | 2.52  |
| NM_018646    | <i>TRPV6</i>        | -1.06 | -2.04  | 1.92  |
| NM_198471    | <i>KANK3</i>        | -1.06 | 2.12   | -2.25 |
| NM_033006    | <i>NLRP1</i>        | -1.06 | 2.46   | -2.62 |
| NR_002186    | <i>DKFZP586I142</i> | -1.07 | -2.34  | 2.18  |
| NM_001174066 | <i>FGFR1</i>        | -1.07 | 2.25   | -2.41 |
| NM_002828    | <i>PTPN2</i>        | -1.07 | -2.44  | 2.28  |
| NM_001025252 | <i>TPD52</i>        | -1.08 | -4.00  | 3.69  |
| NM_003651    | <i>CSDA</i>         | -1.08 | -2.04  | 1.88  |
| NM_173797    | <i>PAPD4</i>        | -1.08 | -5.01  | 4.62  |
| NM_014858    | <i>TMCC2</i>        | -1.09 | -10.03 | 9.22  |
| NM_032154    | <i>PCGF6</i>        | -1.09 | 2.06   | -2.25 |
| NM_004139    | <i>LBP</i>          | -1.10 | -9.25  | 8.37  |
| NM_002210    | <i>ITGAV</i>        | -1.11 | -2.47  | 2.22  |
| NM_002543    | <i>OLR1</i>         | -1.12 | 6.29   | -7.01 |
| NM_001270473 | <i>CENPN</i>        | -1.12 | 2.36   | -2.63 |
| NM_182493    | <i>MYLK3</i>        | -1.12 | -3.25  | 2.90  |
| NR_027716    | <i>H2AFJ</i>        | -1.12 | -2.63  | 2.34  |
| NR_024621    | <i>C11orf21</i>     | -1.13 | 2.44   | -2.75 |
| NM_002318    | <i>LOXL2</i>        | -1.13 | -2.78  | 2.47  |
| NM_000891    | <i>KCNJ2</i>        | -1.13 | -2.63  | 2.33  |

|                |                  |       |       |       |
|----------------|------------------|-------|-------|-------|
| NM_001267822   | <i>ZMYND15</i>   | -1.13 | 2.28  | -2.57 |
| NM_001145000   | <i>ITGAV</i>     | -1.13 | -2.99 | 2.64  |
| NM_152342      | <i>CDYL2</i>     | -1.13 | -2.55 | 2.25  |
| NM_014344      | <i>FJX1</i>      | -1.13 | -2.10 | 1.85  |
| NM_001256579   | <i>LOC388813</i> | -1.13 | -4.31 | 3.80  |
| NR_040079      | <i>LOC399715</i> | -1.13 | -2.82 | 2.49  |
| NM_001459      | <i>FLT3LG</i>    | -1.13 | -3.09 | 2.72  |
| NM_206824      | <i>VKORC1</i>    | -1.14 | -3.46 | 3.04  |
| NM_004052      | <i>BNIP3</i>     | -1.14 | -4.55 | 4.00  |
| NM_001244701   | <i>ZFP36L1</i>   | -1.14 | -2.57 | 2.26  |
| NM_001145305   | <i>KIAA1683</i>  | -1.14 | -2.29 | 2.01  |
| NM_002885      | <i>RAP1GAP</i>   | -1.14 | 2.86  | -3.28 |
| NM_002196      | <i>INSM1</i>     | -1.15 | -2.83 | 2.46  |
| NM_001254738   | <i>RND3</i>      | -1.15 | -4.33 | 3.76  |
| NM_015259      | <i>ICOSLG</i>    | -1.16 | 3.19  | -3.69 |
| NM_001131055   | <i>HRH2</i>      | -1.16 | -8.01 | 6.88  |
| NR_027011      | <i>CSDAP1</i>    | -1.16 | -2.17 | 1.86  |
| NM_001242877   | <i>ELP2</i>      | -1.17 | -3.34 | 2.87  |
| NM_001271007   | <i>STRA13</i>    | -1.17 | -2.70 | 2.32  |
| NM_001080976   | <i>DSE</i>       | -1.17 | -2.18 | 1.86  |
| NM_001256154   | <i>ALOX5</i>     | -1.17 | 4.05  | -4.74 |
| NM_133631      | <i>ROBO1</i>     | -1.17 | -6.32 | 5.40  |
| NM_001173488   | <i>NKRF</i>      | -1.17 | -2.62 | 2.24  |
| NM_001040655   | <i>TTC23</i>     | -1.17 | 2.88  | -3.37 |
| NM_020717      | <i>SHROOM4</i>   | -1.17 | 2.45  | -2.88 |
| NM_001145903.1 | <i>C2</i>        | -1.17 | -2.15 | 1.83  |
| NM_153259      | <i>MCOLN2</i>    | -1.18 | -2.03 | 1.73  |
| NR_026589      | <i>WHAMMP2</i>   | -1.18 | -2.34 | 1.99  |
| NM_001710      | <i>CFB</i>       | -1.18 | -2.09 | 1.78  |
| NM_020704      | <i>STRIP2</i>    | -1.18 | -3.25 | 2.75  |
| NM_001165      | <i>BIRC3</i>     | -1.18 | -2.69 | 2.27  |
| NM_001167985   | <i>INCA1</i>     | -1.18 | -2.42 | 2.05  |
| NR_026859      | <i>ULK4P3</i>    | -1.19 | -2.28 | 1.92  |
| NM_012334      | <i>MYO10</i>     | -1.19 | -3.27 | 2.75  |
| NM_175052      | <i>ST8SIA4</i>   | -1.19 | -2.29 | 1.93  |
| NM_001199887   | <i>IL7</i>       | -1.19 | -2.72 | 2.28  |
| NM_003775      | <i>S1PR4</i>     | -1.19 | 2.22  | -2.64 |
| NM_003812      | <i>ADAM23</i>    | -1.19 | -3.48 | 2.92  |
| NM_001759      | <i>CCND2</i>     | -1.20 | 3.87  | -4.63 |
| NM_000651      | <i>CR1</i>       | -1.20 | -5.82 | 4.85  |

|              |                    |       |        |       |
|--------------|--------------------|-------|--------|-------|
| NM_001164234 | <i>DDHD2</i>       | -1.20 | -2.08  | 1.73  |
| NR_072980    | <i>NIM1</i>        | -1.20 | -2.18  | 1.81  |
| NM_003485    | <i>GPR68</i>       | -1.21 | 3.16   | -3.81 |
| NM_001001547 | <i>CD36</i>        | -1.21 | -3.18  | 2.63  |
| NM_001040668 | <i>BCL2L12</i>     | -1.21 | -3.08  | 2.54  |
| NM_001170631 | <i>FCAMR</i>       | -1.21 | -15.66 | 12.91 |
| NM_002356    | <i>MARCKS</i>      | -1.22 | -2.34  | 1.91  |
| NM_145172    | <i>WDR63</i>       | -1.22 | -2.38  | 1.95  |
| NM_001161357 | <i>FCHO1</i>       | -1.23 | 2.08   | -2.55 |
| NM_001172509 | <i>SATB2</i>       | -1.23 | -2.52  | 2.05  |
| NM_033211    | <i>C5orf30</i>     | -1.23 | -2.07  | 1.69  |
| NM_005512    | <i>LRRC32</i>      | -1.23 | 2.65   | -3.26 |
| NR_038902    | <i>JAKMIP2-AS1</i> | -1.23 | 2.56   | -3.15 |
| NR_028050    | <i>MTERFD2</i>     | -1.23 | -3.20  | 2.60  |
| NM_181726    | <i>ANKRD37</i>     | -1.24 | -3.48  | 2.82  |
| NM_001164469 | <i>TMED7-</i>      | -1.24 | -2.20  | 1.77  |
| NM_014945    | <i>ABLIM3</i>      | -1.25 | -3.27  | 2.62  |
| NM_014883    | <i>FAM13A</i>      | -1.25 | -2.21  | 1.77  |
| NM_001243778 | <i>FAM213A</i>     | -1.25 | 2.28   | -2.85 |
| NM_080625    | <i>CCM2L</i>       | -1.25 | -3.84  | 3.08  |
| NM_147187    | <i>TNFRSF10B</i>   | -1.25 | -2.07  | 1.65  |
| NM_001171159 | <i>SIGLEC10</i>    | -1.25 | -2.19  | 1.74  |
| NM_206954    | <i>PRAME</i>       | -1.25 | -3.37  | 2.69  |
| NM_181655    | <i>C17orf58</i>    | -1.26 | -2.87  | 2.28  |
| NM_057180    | <i>VPS29</i>       | -1.26 | -2.33  | 1.85  |
| NM_001024946 | <i>ASL</i>         | -1.27 | -5.25  | 4.15  |
| NM_003560    | <i>PLA2G6</i>      | -1.28 | -2.16  | 1.69  |
| NM_001198689 | <i>LEPR</i>        | -1.28 | -2.11  | 1.65  |
| NM_000665    | <i>ACHE</i>        | -1.28 | -12.39 | 9.66  |
| NM_021958    | <i>HLX</i>         | -1.28 | -2.44  | 1.90  |
| NM_006092    | <i>NOD1</i>        | -1.29 | -2.36  | 1.84  |
| NM_130384    | <i>ATRIP</i>       | -1.29 | -2.24  | 1.74  |
| NM_018565    | <i>SERINC2</i>     | -1.29 | 4.22   | -5.45 |
| NM_007173    | <i>PRSS23</i>      | -1.29 | -2.82  | 2.19  |
| NM_006955    | <i>ZNF33B</i>      | -1.29 | -2.04  | 1.58  |
| NM_001165414 | <i>LDHA</i>        | -1.29 | -2.46  | 1.90  |
| NM_001142483 | <i>NREP</i>        | -1.29 | -2.28  | 1.76  |
| NM_006505    | <i>PVR</i>         | -1.29 | -2.76  | 2.13  |
| NM_000875    | <i>IGF1R</i>       | -1.30 | -2.05  | 1.59  |
| NM_014824    | <i>FCHSD2</i>      | -1.30 | -2.18  | 1.67  |

|              |                    |       |       |       |
|--------------|--------------------|-------|-------|-------|
| NM_013276    | <i>SHPK</i>        | -1.30 | 2.21  | -2.88 |
| NM_153634    | <i>CPNE8</i>       | -1.30 | -2.04 | 1.57  |
| NM_001100117 | <i>RIMS2</i>       | -1.30 | -2.98 | 2.29  |
| NM_139022    | <i>TSPAN32</i>     | -1.30 | 2.19  | -2.85 |
| NM_001145658 | <i>RAP1GAP</i>     | -1.30 | 3.21  | -4.18 |
| NM_000020    | <i>ACVRL1</i>      | -1.31 | 2.20  | -2.89 |
| NM_153746    | <i>ZDHHC14</i>     | -1.31 | -2.06 | 1.57  |
| NM_014791    | <i>MELK</i>        | -1.31 | -2.76 | 2.10  |
| NM_001035005 | <i>C18orf32</i>    | -1.32 | -2.15 | 1.63  |
| NM_001184717 | <i>TIPARP</i>      | -1.33 | -3.03 | 2.28  |
| NM_030668    | <i>PTPRO</i>       | -1.33 | -2.07 | 1.55  |
| NM_032148    | <i>SLC41A2</i>     | -1.33 | -2.12 | 1.59  |
| NM_007222    | <i>ZHX1</i>        | -1.34 | -2.34 | 1.75  |
| NM_002424    | <i>MMP8</i>        | -1.34 | -3.50 | 2.61  |
| NR_040086    | <i>SETD4</i>       | -1.34 | 2.16  | -2.90 |
| NM_001206609 | <i>SELPLG</i>      | -1.35 | -2.25 | 1.67  |
| NR_026806    | <i>FLJ13224</i>    | -1.35 | -2.03 | 1.51  |
| NM_000088    | <i>COL1A1</i>      | -1.35 | -3.98 | 2.95  |
| NM_147128    | <i>ZNRF2</i>       | -1.35 | -3.06 | 2.27  |
| NM_001207013 | <i>PTPN2</i>       | -1.35 | -3.80 | 2.81  |
| NM_203288    | <i>RP9</i>         | -1.35 | -2.20 | 1.63  |
| NM_004099    | <i>STOM</i>        | -1.35 | -2.24 | 1.65  |
| NM_207360    | <i>ZC3H12D</i>     | -1.36 | -2.12 | 1.57  |
| NM_001466    | <i>FZD2</i>        | -1.36 | -3.26 | 2.40  |
| NR_047701    | <i>COA1</i>        | -1.36 | -2.41 | 1.77  |
| NM_144683    | <i>DHRS13</i>      | -1.36 | -3.20 | 2.35  |
| NM_005668    | <i>ST8SIA4</i>     | -1.36 | -2.66 | 1.95  |
| NR_038863    | <i>LOC285758</i>   | -1.37 | -4.48 | 3.28  |
| NM_005715    | <i>UST</i>         | -1.37 | -2.19 | 1.60  |
| NR_003334    | <i>SNORD116-20</i> | -1.37 | -2.01 | 1.47  |
| NR_002980    | <i>SNORA50</i>     | -1.38 | -2.28 | 1.66  |
| NM_005090    | <i>JMJD7-</i>      | -1.38 | -2.38 | 1.73  |
| NM_003006    | <i>SELPLG</i>      | -1.38 | -2.19 | 1.58  |
| NM_194278    | <i>ELMSAN1</i>     | -1.38 | -2.03 | 1.47  |
| NM_000712    | <i>BLVRA</i>       | -1.38 | -2.30 | 1.66  |
| NM_138636    | <i>TLR8</i>        | -1.39 | -2.06 | 1.48  |
| NM_021991    | <i>JUP</i>         | -1.40 | 2.14  | -2.99 |
| NM_001112800 | <i>SLC8A1</i>      | -1.40 | -2.17 | 1.55  |
| NR_040101    | <i>KLHDC3</i>      | -1.41 | -2.25 | 1.60  |
| NM_001134707 | <i>SARDH</i>       | -1.41 | 3.63  | -5.10 |

|              |                     |       |        |       |
|--------------|---------------------|-------|--------|-------|
| NM_025263.1  | <i>PRR3</i>         | -1.41 | -2.48  | 1.76  |
| NM_021097    | <i>SLC8A1</i>       | -1.41 | -2.16  | 1.54  |
| NM_153235    | <i>TXLNB</i>        | -1.41 | -2.00  | 1.42  |
| NM_199436    | <i>SPAST</i>        | -1.41 | -2.48  | 1.75  |
| NM_032023    | <i>RASSF4</i>       | -1.41 | -3.61  | 2.55  |
| NM_016108    | <i>AIG1</i>         | -1.41 | -2.74  | 1.94  |
| NM_001128210 | <i>SPRED2</i>       | -1.42 | -3.35  | 2.36  |
| NM_032143    | <i>ZRANB3</i>       | -1.42 | -2.16  | 1.52  |
| NM_001261829 | <i>MINA</i>         | -1.43 | 2.48   | -3.55 |
| NR_002983    | <i>SNORA55</i>      | -1.44 | -2.43  | 1.69  |
| NR_024110    | <i>SBDSP1</i>       | -1.44 | -2.42  | 1.68  |
| NM_203463    | <i>CERS6</i>        | -1.44 | -2.83  | 1.96  |
| NR_000005    | <i>SNORD15A</i>     | -1.45 | -2.26  | 1.56  |
| NM_006206    | <i>PDGFRA</i>       | -1.45 | -2.37  | 1.63  |
| NM_012329    | <i>MMD</i>          | -1.45 | -2.30  | 1.58  |
| NM_001207019 | <i>FCER2</i>        | -1.46 | 2.90   | -4.23 |
| NM_007261    | <i>CD300A</i>       | -1.46 | -2.67  | 1.82  |
| NR_038123    | <i>PSMA3</i>        | -1.47 | -2.75  | 1.87  |
| NM_005099    | <i>ADAMTS4</i>      | -1.47 | -35.27 | 23.95 |
| NM_015869    | <i>PPARG</i>        | -1.48 | 2.22   | -3.29 |
| NM_005688    | <i>ABCC5</i>        | -1.48 | -2.11  | 1.42  |
| NM_020845    | <i>PITPNM2</i>      | -1.48 | -2.79  | 1.88  |
| NM_004332    | <i>BPHL</i>         | -1.49 | -2.52  | 1.70  |
| NM_002060    | <i>GJA4</i>         | -1.49 | -5.54  | 3.73  |
| NM_001127700 | <i>SERPINA1</i>     | -1.49 | -2.53  | 1.69  |
| NM_001040659 | <i>TTC23</i>        | -1.50 | -3.17  | 2.10  |
| NR_003697    | <i>SNHG15</i>       | -1.52 | -2.68  | 1.77  |
| NM_001039660 | <i>IL18BP</i>       | -1.52 | -2.21  | 1.46  |
| NR_038304    | <i>LOC100505702</i> | -1.52 | -3.24  | 2.13  |
| NM_001001391 | <i>CD44</i>         | -1.52 | -2.12  | 1.39  |
| NM_001242638 | <i>IL31RA</i>       | -1.52 | -3.15  | 2.07  |
| NM_025239    | <i>PDCD1LG2</i>     | -1.53 | -2.34  | 1.53  |
| NM_020179    | <i>C11orf75</i>     | -1.53 | -2.05  | 1.34  |
| NM_003632    | <i>CNTNAP1</i>      | -1.53 | -2.58  | 1.69  |
| NM_201436    | <i>H2AFV</i>        | -1.53 | -3.99  | 2.60  |
| NM_001114395 | <i>CNTLN</i>        | -1.54 | -2.80  | 1.82  |
| NM_001003679 | <i>LEPR</i>         | -1.55 | -2.38  | 1.54  |
| NR_003079    | <i>SNORD111</i>     | -1.57 | -2.72  | 1.73  |
| NM_001168241 | <i>GAREML</i>       | -1.57 | -2.10  | 1.33  |
| NM_001201362 | <i>HMGN3</i>        | -1.58 | -2.04  | 1.30  |

|              |                  |       |        |       |
|--------------|------------------|-------|--------|-------|
| NM_178562    | <i>TSPAN33</i>   | -1.58 | -3.68  | 2.32  |
| NM_000643    | <i>AGL</i>       | -1.58 | -2.05  | 1.30  |
| NM_003655    | <i>CBX4</i>      | -1.59 | -2.70  | 1.70  |
| NR_024405    | <i>LOC730101</i> | -1.59 | -2.61  | 1.65  |
| NM_172002    | <i>HSCB</i>      | -1.59 | -2.14  | 1.35  |
| NM_080422    | <i>PTPN2</i>     | -1.59 | -3.13  | 1.97  |
| NM_002987    | <i>CCL17</i>     | -1.59 | -5.50  | 3.45  |
| NM_004192    | <i>ASMTL</i>     | -1.59 | -2.62  | 1.65  |
| NM_000789    | <i>ACE</i>       | -1.60 | 2.57   | -4.10 |
| NM_001167604 | <i>XPNPEP1</i>   | -1.61 | -2.05  | 1.28  |
| NM_001193657 | <i>C17orf62</i>  | -1.61 | -2.56  | 1.59  |
| NM_001723    | <i>DST</i>       | -1.61 | -2.46  | 1.52  |
| NM_001244897 | <i>PTBP3</i>     | -1.62 | -2.13  | 1.31  |
| NM_030958    | <i>SLCO5A1</i>   | -1.62 | -2.94  | 1.82  |
| NM_023009    | <i>MARCKSL1</i>  | -1.62 | -3.78  | 2.33  |
| NM_001010917 | <i>GOLGA7B</i>   | -1.62 | -2.47  | 1.52  |
| NM_001031711 | <i>ERGIC1</i>    | -1.62 | -2.37  | 1.46  |
| NM_007270    | <i>FKBP9</i>     | -1.62 | -2.10  | 1.29  |
| NM_001242370 | <i>CACFD1</i>    | -1.63 | -2.31  | 1.42  |
| NR_045690    | <i>C19orf12</i>  | -1.63 | -2.51  | 1.55  |
| NM_014333    | <i>CADM1</i>     | -1.63 | -2.67  | 1.64  |
| NM_001080824 | <i>TRABD2A</i>   | -1.63 | 2.90   | -4.73 |
| NM_003195    | <i>TCEA2</i>     | -1.63 | -2.00  | 1.23  |
| NM_001637    | <i>AOAH</i>      | -1.64 | -2.92  | 1.79  |
| NM_001018037 | <i>VPS13A</i>    | -1.64 | -2.20  | 1.34  |
| NM_152904    | <i>SPECC1</i>    | -1.64 | -4.05  | 2.47  |
| NM_052818    | <i>N4BP2L1</i>   | -1.65 | -2.54  | 1.54  |
| NM_006202    | <i>PDE4A</i>     | -1.65 | 2.06   | -3.39 |
| NM_015957    | <i>APIP</i>      | -1.65 | -2.05  | 1.24  |
| NM_000240    | <i>MAOA</i>      | -1.66 | -16.58 | 10.01 |
| NM_002390    | <i>ADAM11</i>    | -1.66 | -3.76  | 2.27  |
| NM_001144999 | <i>ITGAV</i>     | -1.66 | -3.53  | 2.13  |
| NM_001174152 | <i>RABEPK</i>    | -1.66 | -4.46  | 2.68  |
| NM_015675    | <i>GADD45B</i>   | -1.66 | -2.00  | 1.21  |
| NM_006829    | <i>C10orf116</i> | -1.67 | -3.28  | 1.97  |
| NM_001386    | <i>DPYSL2</i>    | -1.67 | -2.52  | 1.51  |
| NM_001033553 | <i>SPECC1</i>    | -1.67 | -2.38  | 1.42  |
| NM_001037442 | <i>RUFY3</i>     | -1.67 | -2.12  | 1.26  |
| NM_004466    | <i>GPC5</i>      | -1.67 | -2.93  | 1.75  |
| NM_176894    | <i>P2RY13</i>    | -1.68 | -7.60  | 4.52  |

|              |                    |       |        |       |
|--------------|--------------------|-------|--------|-------|
| NM_001145515 | <i>SCRN1</i>       | -1.68 | -3.50  | 2.08  |
| NM_004273    | <i>CHST3</i>       | -1.68 | 2.65   | -4.45 |
| NR_003331    | <i>SNORD116-16</i> | -1.68 | -3.28  | 1.94  |
| NM_001009944 | <i>PKD1</i>        | -1.69 | -2.14  | 1.27  |
| NM_017923    | <i>1-Mar</i>       | -1.69 | -4.53  | 2.68  |
| NM_173653    | <i>SLC9A9</i>      | -1.69 | -2.63  | 1.55  |
| NM_001243247 | <i>NPRL3</i>       | -1.69 | -2.24  | 1.32  |
| NR_037918    | <i>PRH1-PRR4</i>   | -1.70 | -2.11  | 1.24  |
| NR_028371    | <i>FAS-AS1</i>     | -1.70 | -2.48  | 1.46  |
| NM_001242925 | <i>TMCC2</i>       | -1.70 | -11.70 | 6.88  |
| NM_001142573 | <i>IMPDH1</i>      | -1.70 | -3.07  | 1.80  |
| NM_001110514 | <i>EBF4</i>        | -1.70 | -8.77  | 5.15  |
| NM_173607    | <i>FAM177A1</i>    | -1.70 | -2.09  | 1.23  |
| NM_005655    | <i>KLF10</i>       | -1.71 | -2.01  | 1.18  |
| NM_001010919 | <i>FAM26F</i>      | -1.71 | -3.71  | 2.17  |
| NM_139047    | <i>MAPK8</i>       | -1.72 | -2.64  | 1.54  |
| NM_001173540 | <i>BANP</i>        | -1.72 | 2.02   | -3.47 |
| NM_173206    | <i>PIAS2</i>       | -1.72 | -2.05  | 1.19  |
| NM_003730    | <i>RNASET2</i>     | -1.73 | -2.53  | 1.47  |
| NM_001112801 | <i>SLC8A1</i>      | -1.73 | -2.30  | 1.33  |
| NM_001099625 | <i>MTFR1L</i>      | -1.73 | -2.05  | 1.18  |
| NM_002751    | <i>MAPK11</i>      | -1.73 | -2.57  | 1.49  |
| NR_003336    | <i>SNORD116-22</i> | -1.73 | -2.99  | 1.73  |
| NR_003318    | <i>SNORD116-3</i>  | -1.73 | -2.44  | 1.41  |
| NR_003324    | <i>SNORD116-9</i>  | -1.73 | -2.44  | 1.41  |
| NM_001256126 | <i>CERS6</i>       | -1.74 | -3.57  | 2.06  |
| NM_001193646 | <i>ATF5</i>        | -1.75 | -2.10  | 1.21  |
| NM_001146289 | <i>LEPRE1</i>      | -1.75 | -2.08  | 1.19  |
| NM_001128913 | <i>PCBP2</i>       | -1.75 | -2.47  | 1.41  |
| NM_001924    | <i>GADD45A</i>     | -1.75 | -5.32  | 3.04  |
| NM_003877    | <i>SOCS2</i>       | -1.75 | -5.65  | 3.22  |
| NM_001243439 | <i>SPECC1</i>      | -1.76 | -2.59  | 1.47  |
| NM_001195227 | <i>TRPM4</i>       | -1.76 | -2.16  | 1.23  |
| NR_049764    | <i>FBXO28</i>      | -1.76 | 2.83   | -4.98 |
| NM_001135662 | <i>RAB7L1</i>      | -1.77 | -2.50  | 1.41  |
| NR_038843    | <i>GOLGA8S</i>     | -1.77 | -2.38  | 1.34  |
| NR_003521    | <i>WHAMMP3</i>     | -1.77 | -2.78  | 1.57  |
| NM_001252624 | <i>SLC8A1</i>      | -1.78 | -2.30  | 1.30  |
| NM_032898    | <i>CEP19</i>       | -1.78 | -2.50  | 1.41  |
| NM_001243351 | <i>NUB1</i>        | -1.78 | -2.27  | 1.28  |

|              |                   |       |       |      |
|--------------|-------------------|-------|-------|------|
| NR_033933    | <i>GOLGA8T</i>    | -1.79 | -2.31 | 1.30 |
| NM_001289    | <i>CLIC2</i>      | -1.79 | -2.93 | 1.64 |
| NM_001127443 | <i>CD36</i>       | -1.79 | -6.34 | 3.55 |
| NM_014395    | <i>DAPP1</i>      | -1.79 | -3.09 | 1.72 |
| NM_021903.4  | <i>GABBR1</i>     | -1.80 | -2.18 | 1.21 |
| NM_018224    | <i>COA1</i>       | -1.81 | -3.16 | 1.75 |
| NM_006985    | <i>NPIP</i>       | -1.81 | -2.16 | 1.19 |
| NM_018927    | <i>PCDHGB7</i>    | -1.81 | -2.68 | 1.48 |
| NM_001001548 | <i>CD36</i>       | -1.82 | -4.75 | 2.62 |
| NM_172160    | <i>KCNAB1</i>     | -1.82 | -2.15 | 1.18 |
| NM_144590    | <i>ANKRD22</i>    | -1.82 | -2.67 | 1.47 |
| NM_004710    | <i>SYNGR2</i>     | -1.83 | -2.24 | 1.22 |
| NM_002969    | <i>MAPK12</i>     | -1.83 | -2.35 | 1.28 |
| NM_001270471 | <i>SOCS2</i>      | -1.84 | -9.48 | 5.16 |
| NM_014961    | <i>RUFY3</i>      | -1.84 | -2.41 | 1.31 |
| NM_173042    | <i>IL18BP</i>     | -1.84 | -2.62 | 1.42 |
| NM_001171156 | <i>SIGLEC10</i>   | -1.84 | -2.48 | 1.35 |
| NM_001204450 | <i>CCPG1</i>      | -1.85 | -2.07 | 1.12 |
| NM_194328    | <i>RNF38</i>      | -1.85 | -2.06 | 1.11 |
| NM_001135239 | <i>LDHA</i>       | -1.85 | -3.33 | 1.80 |
| NM_001540    | <i>HSPB1</i>      | -1.85 | -2.25 | 1.22 |
| NM_016118    | <i>NUB1</i>       | -1.85 | -2.30 | 1.24 |
| NR_046478    | <i>FKBP14</i>     | -1.86 | -4.20 | 2.26 |
| NM_001135161 | <i>COMT</i>       | -1.87 | -2.28 | 1.22 |
| NM_004086    | <i>COCH</i>       | -1.89 | -3.33 | 1.76 |
| NM_138799    | <i>MBOAT2</i>     | -1.89 | -3.39 | 1.79 |
| NM_001261441 | <i>EXTL2</i>      | -1.90 | -2.48 | 1.30 |
| NR_003317    | <i>SNORD116-2</i> | -1.91 | -2.29 | 1.20 |
| NM_021111    | <i>RECK</i>       | -1.91 | -2.12 | 1.11 |
| NM_021129    | <i>PPA1</i>       | -1.92 | -5.81 | 3.02 |
| NM_002349    | <i>LY75</i>       | -1.93 | -2.37 | 1.23 |
| NM_003644    | <i>GAS7</i>       | -1.94 | -2.40 | 1.24 |
| NM_001258207 | <i>VAV1</i>       | -1.94 | -3.14 | 1.62 |
| NM_001126118 | <i>TP53</i>       | -1.95 | -5.08 | 2.60 |
| NM_173664    | <i>ARL10</i>      | -1.96 | -2.68 | 1.37 |
| NM_002404    | <i>MFAP4</i>      | -1.96 | -2.06 | 1.05 |
| NM_198572    | <i>SPATC1</i>     | -1.97 | -4.16 | 2.12 |
| NM_004560    | <i>ROR2</i>       | -1.97 | -2.75 | 1.39 |
| NM_001177506 | <i>AOAH</i>       | -1.97 | -3.76 | 1.91 |
| NM_005962    | <i>MXI1</i>       | -1.98 | -5.12 | 2.59 |

|              |                    |       |       |       |
|--------------|--------------------|-------|-------|-------|
| NM_020739    | <i>CCPG1</i>       | -1.98 | -2.31 | 1.17  |
| NM_017738    | <i>CNTLN</i>       | -1.98 | -2.46 | 1.24  |
| NM_001123383 | <i>BCOR</i>        | -1.98 | -2.58 | 1.30  |
| NM_005755    | <i>EBI3</i>        | -1.98 | -3.18 | 1.60  |
| NM_000958    | <i>PTGER4</i>      | -1.99 | -2.31 | 1.16  |
| NM_001024943 | <i>ASL</i>         | -1.99 | -2.55 | 1.28  |
| NM_000296    | <i>PKD1</i>        | -1.99 | -2.74 | 1.38  |
| NM_001042410 | <i>ANKZF1</i>      | -2.00 | -4.17 | 2.09  |
| NM_001207049 | <i>BACE1</i>       | -2.00 | -2.34 | 1.17  |
| NM_005170    | <i>ASCL2</i>       | -2.00 | -1.52 | -1.32 |
| NM_152400    | <i>C4orf32</i>     | -2.00 | -2.01 | 1.00  |
| NM_001009933 | <i>DNASE1L1</i>    | -2.01 | -1.99 | -1.01 |
| NR_003323    | <i>SNORD116-8</i>  | -2.01 | -2.28 | 1.14  |
| NM_001552    | <i>IGFBP4</i>      | -2.01 | -1.23 | -1.63 |
| NM_020142    | <i>NDUFA4L2</i>    | -2.01 | -2.10 | 1.05  |
| NM_000962    | <i>PTGS1</i>       | -2.01 | -1.22 | -1.65 |
| NM_001103167 | <i>ZGLP1</i>       | -2.01 | -1.77 | -1.14 |
| NM_024490    | <i>ATP10A</i>      | -2.01 | -2.19 | 1.09  |
| NM_001256394 | <i>NOL8</i>        | -2.01 | -2.02 | 1.00  |
| NM_015548    | <i>DST</i>         | -2.01 | -2.85 | 1.41  |
| NM_001172412 | <i>VANGL1</i>      | -2.01 | -1.87 | -1.08 |
| NM_003045    | <i>SLC7A1</i>      | -2.01 | -1.94 | -1.04 |
| NM_001170931 | <i>FOXO4</i>       | -2.02 | 1.18  | -2.38 |
| NM_173657    | <i>C3orf33</i>     | -2.02 | -1.23 | -1.64 |
| NM_001025235 | <i>TSPAN4</i>      | -2.02 | -3.62 | 1.79  |
| NM_001112802 | <i>SLC8A1</i>      | -2.02 | -2.48 | 1.23  |
| NM_152989    | <i>SOX5</i>        | -2.02 | -5.37 | 2.66  |
| NR_024117.1  | <i>MSTO2P</i>      | -2.02 | -1.76 | -1.15 |
| NM_014666    | <i>CLINT1</i>      | -2.03 | -1.46 | -1.38 |
| NR_003337    | <i>SNORD116-23</i> | -2.03 | -2.64 | 1.30  |
| NM_007286    | <i>SYNPO</i>       | -2.03 | -9.96 | 4.90  |
| NM_015517    | <i>HINFP</i>       | -2.03 | -2.22 | 1.09  |
| NM_018649    | <i>H2AFY2</i>      | -2.04 | -2.44 | 1.20  |
| NM_004529    | <i>MLLT3</i>       | -2.05 | -3.98 | 1.94  |
| NM_201612    | <i>IKBIP</i>       | -2.05 | -3.20 | 1.56  |
| NM_024296    | <i>CCDC28B</i>     | -2.05 | -2.17 | 1.06  |
| NR_002936    | <i>TOB2P1</i>      | -2.06 | -1.55 | -1.32 |
| NR_046329    | <i>TRIM46</i>      | -2.06 | -1.66 | -1.24 |
| NM_001127444 | <i>CD36</i>        | -2.06 | -5.81 | 2.82  |
| NM_006039    | <i>MRC2</i>        | -2.06 | -1.48 | -1.39 |

|              |                    |       |        |       |
|--------------|--------------------|-------|--------|-------|
| NM_003741    | <i>CHRD</i>        | -2.06 | 1.53   | -3.16 |
| NM_001207018 | <i>SMTN</i>        | -2.06 | -2.93  | 1.42  |
| NM_006274    | <i>CCL19</i>       | -2.07 | -37.30 | 18.02 |
| NR_003340    | <i>SNORD116-26</i> | -2.07 | -2.31  | 1.12  |
| NR_047546    | <i>SCFD1</i>       | -2.07 | -1.10  | -1.88 |
| NM_032276    | <i>RHBDD1</i>      | -2.07 | -1.87  | -1.11 |
| NM_017549    | <i>EPDR1</i>       | -2.07 | -2.95  | 1.42  |
| NM_001130709 | <i>RUFY3</i>       | -2.07 | -3.57  | 1.72  |
| NM_001144936 | <i>C11orf95</i>    | -2.08 | -2.39  | 1.15  |
| NM_001114380 | <i>ITGAL</i>       | -2.08 | -1.38  | -1.50 |
| NM_001168377 | <i>KIAA0319</i>    | -2.08 | 1.00   | -2.08 |
| NM_001012514 | <i>ITM2C</i>       | -2.08 | -1.17  | -1.77 |
| NM_015198    | <i>COBL</i>        | -2.08 | 1.08   | -2.24 |
| NM_000043    | <i>FAS</i>         | -2.08 | -2.77  | 1.33  |
| NM_001127399 | <i>YPEL5</i>       | -2.08 | -3.02  | 1.45  |
| NR_045568    | <i>IRF3</i>        | -2.08 | -2.77  | 1.33  |
| NM_019555    | <i>ARHGEF3</i>     | -2.08 | 1.02   | -2.13 |
| NM_145715    | <i>TIGD2</i>       | -2.08 | -1.91  | -1.09 |
| NM_002562    | <i>P2RX7</i>       | -2.09 | -2.12  | 1.02  |
| NM_001190202 | <i>CES4A</i>       | -2.09 | -4.58  | 2.19  |
| NM_001465    | <i>FYB</i>         | -2.09 | -2.30  | 1.10  |
| NM_001144382 | <i>PLCL2</i>       | -2.10 | -1.87  | -1.12 |
| NR_048556    | <i>TSN</i>         | -2.11 | -1.23  | -1.71 |
| NM_001102610 | <i>TUBGCP5</i>     | -2.11 | -2.42  | 1.15  |
| NM_001130720 | <i>AHCYL2</i>      | -2.11 | -1.83  | -1.15 |
| NM_001258406 | <i>IRG1</i>        | -2.11 | -6.18  | 2.93  |
| NM_152305    | <i>POGLUT1</i>     | -2.11 | -3.99  | 1.89  |
| NM_020733    | <i>HEG1</i>        | -2.11 | -1.89  | -1.12 |
| NM_001080    | <i>ALDH5A1</i>     | -2.12 | 1.19   | -2.53 |
| NM_001242900 | <i>PPP6R2</i>      | -2.12 | -1.86  | -1.14 |
| NM_207370    | <i>GPR153</i>      | -2.12 | -1.51  | -1.41 |
| NM_015537    | <i>NELF</i>        | -2.12 | -1.96  | -1.08 |
| NR_027322    | <i>LOC283070</i>   | -2.12 | -1.55  | -1.37 |
| NR_000025    | <i>SNORD15B</i>    | -2.13 | -2.00  | -1.06 |
| NM_001126115 | <i>TP53</i>        | -2.13 | -2.66  | 1.25  |
| NM_012306    | <i>FAIM2</i>       | -2.14 | 2.56   | -5.47 |
| NM_001127396 | <i>STXBP2</i>      | -2.14 | -1.15  | -1.86 |
| NM_001200029 | <i>HYAL3</i>       | -2.14 | -2.67  | 1.25  |
| NM_080283    | <i>ABCA9</i>       | -2.15 | 1.01   | -2.16 |
| NM_014974    | <i>DIP2C</i>       | -2.15 | -1.11  | -1.93 |

|              |                  |       |        |       |
|--------------|------------------|-------|--------|-------|
| NM_001089    | <i>ABCA3</i>     | -2.15 | -3.45  | 1.61  |
| NM_001244249 | <i>APEX1</i>     | -2.15 | -3.08  | 1.43  |
| NM_018351    | <i>FGD6</i>      | -2.15 | -2.38  | 1.11  |
| NM_000820    | <i>GAS6</i>      | -2.16 | -2.99  | 1.39  |
| NM_001126054 | <i>CASK</i>      | -2.16 | -1.69  | -1.28 |
| NR_073531    | <i>STK25</i>     | -2.16 | -2.59  | 1.20  |
| NM_021238    | <i>FAM60A</i>    | -2.16 | -2.60  | 1.20  |
| NM_002030    | <i>FPR3</i>      | -2.16 | -2.14  | -1.01 |
| NR_024043    | <i>LGALS9</i>    | -2.17 | -1.46  | -1.48 |
| NM_001242636 | <i>IL31RA</i>    | -2.17 | -2.22  | 1.02  |
| NM_000566    | <i>FCGR1A</i>    | -2.17 | -2.38  | 1.10  |
| NM_001048172 | <i>MUTYH</i>     | -2.19 | -1.33  | -1.64 |
| NM_024592    | <i>SRD5A3</i>    | -2.19 | -1.98  | -1.11 |
| NM_015136    | <i>STAB1</i>     | -2.19 | -14.72 | 6.72  |
| NM_014366    | <i>GNL3</i>      | -2.19 | -2.69  | 1.23  |
| NM_001206480 | <i>ELMO1</i>     | -2.19 | -1.01  | -2.17 |
| NM_001244910 | <i>FCGR1B</i>    | -2.19 | -2.84  | 1.29  |
| NR_028301    | <i>LOC344595</i> | -2.20 | -2.42  | 1.10  |
| NR_033951    | <i>P2RX7</i>     | -2.20 | -1.97  | -1.11 |
| NM_181508    | <i>HPS5</i>      | -2.20 | -1.65  | -1.33 |
| NM_001248003 | <i>ARNTL2</i>    | -2.20 | -3.03  | 1.38  |
| NM_001077594 | <i>EXOC3L4</i>   | -2.20 | -2.03  | -1.08 |
| NR_047677    | <i>TARS</i>      | -2.21 | -1.07  | -2.07 |
| NM_022468    | <i>MMP25</i>     | -2.21 | -2.80  | 1.27  |
| NM_006227    | <i>PLTP</i>      | -2.21 | -2.07  | -1.07 |
| NM_194294    | <i>IDO2</i>      | -2.21 | -1.94  | -1.14 |
| NM_001271581 | <i>DNAJC10</i>   | -2.22 | -1.97  | -1.12 |
| NM_022845    | <i>CBFB</i>      | -2.22 | -2.00  | -1.11 |
| NM_014435    | <i>NAAA</i>      | -2.22 | -1.98  | -1.12 |
| NM_021175    | <i>HAMP</i>      | -2.22 | -4.33  | 1.95  |
| NM_001024808 | <i>BCL7A</i>     | -2.23 | -3.26  | 1.46  |
| NM_001271023 | <i>ATRIP</i>     | -2.23 | -1.66  | -1.35 |
| NM_014890    | <i>FILIP1L</i>   | -2.24 | -3.66  | 1.63  |
| NM_145805    | <i>ISL2</i>      | -2.24 | -1.46  | -1.53 |
| NM_145659    | <i>IL27</i>      | -2.25 | -1.70  | -1.32 |
| NM_020440    | <i>PTGFRN</i>    | -2.25 | -3.35  | 1.49  |
| NM_015431    | <i>TRIM58</i>    | -2.25 | -2.19  | -1.03 |
| NM_030664    | <i>PTER</i>      | -2.25 | -1.82  | -1.24 |
| NM_001184718 | <i>TIPARP</i>    | -2.26 | -2.71  | 1.20  |
| NM_001206925 | <i>CD86</i>      | -2.27 | -1.15  | -1.96 |

|              |                   |       |       |       |
|--------------|-------------------|-------|-------|-------|
| NM_001242485 | <i>EIF1AD</i>     | -2.27 | 1.18  | -2.69 |
| NM_001207024 | <i>M6PR</i>       | -2.28 | -1.73 | -1.31 |
| NM_001243228 | <i>TCF4</i>       | -2.28 | -3.55 | 1.56  |
| NM_030669    | <i>PTPRO</i>      | -2.28 | -1.34 | -1.70 |
| NM_198156    | <i>VHL</i>        | -2.28 | -1.50 | -1.52 |
| NM_033305    | <i>VPS13A</i>     | -2.29 | -1.72 | -1.33 |
| NR_004399    | <i>SNORD86</i>    | -2.29 | -1.71 | -1.34 |
| NM_020759    | <i>STARD9</i>     | -2.29 | -2.48 | 1.08  |
| NM_001199829 | <i>HORMAD1</i>    | -2.29 | -1.85 | -1.24 |
| NM_003105    | <i>SORL1</i>      | -2.29 | 2.64  | -6.04 |
| NM_001201554 | <i>ZNF821</i>     | -2.29 | -1.19 | -1.93 |
| NM_001146155 | <i>PTGR2</i>      | -2.30 | -2.10 | -1.09 |
| NM_024111    | <i>CHAC1</i>      | -2.30 | -1.92 | -1.20 |
| NM_004032    | <i>DDO</i>        | -2.30 | -1.08 | -2.14 |
| NM_145279    | <i>MOB3C</i>      | -2.31 | -1.96 | -1.18 |
| NM_002977    | <i>SCN9A</i>      | -2.31 | -2.16 | -1.07 |
| NR_003320.1  | <i>SNORD116-5</i> | -2.31 | -2.34 | 1.01  |
| NR_003322    | <i>SNORD116-7</i> | -2.31 | -2.34 | 1.01  |
| NM_020397    | <i>CAMK1D</i>     | -2.31 | -2.12 | -1.09 |
| NM_020477    | <i>ANK1</i>       | -2.31 | -1.06 | -2.18 |
| NM_001199480 | <i>ZNF193</i>     | -2.32 | -1.86 | -1.24 |
| NM_001172656 | <i>ZFYVE28</i>    | -2.32 | -1.24 | -1.86 |
| NM_023001    | <i>ARID4A</i>     | -2.32 | -2.14 | -1.08 |
| NM_012166    | <i>FBXO10</i>     | -2.33 | -2.41 | 1.03  |
| NM_0203433   | <i>PSMG1</i>      | -2.33 | 1.01  | -2.36 |
| NM_015719    | <i>COL5A3</i>     | -2.33 | -6.93 | 2.97  |
| NM_003149    | <i>STAC</i>       | -2.33 | 2.33  | -5.44 |
| NM_001242921 | <i>PLTP</i>       | -2.34 | -2.16 | -1.08 |
| NM_004883    | <i>NRG2</i>       | -2.34 | -4.64 | 1.98  |
| NM_023000    | <i>ARID4A</i>     | -2.35 | -1.69 | -1.40 |
| NM_001172633 | <i>OLR1</i>       | -2.36 | 2.72  | -6.43 |
| NM_022140    | <i>EPB41L4A</i>   | -2.37 | -2.02 | -1.18 |
| NM_002207    | <i>ITGA9</i>      | -2.37 | -4.62 | 1.95  |
| NM_001017986 | <i>FCGR1B</i>     | -2.38 | -3.19 | 1.34  |
| NM_177937    | <i>GOLM1</i>      | -2.39 | -1.53 | -1.56 |
| NM_000014    | <i>A2M</i>        | -2.39 | -1.60 | -1.49 |
| NM_152793    | <i>C7orf41</i>    | -2.40 | -5.03 | 2.10  |
| NM_001271711 | <i>SLC2A8</i>     | -2.40 | -2.15 | -1.12 |
| NM_003456    | <i>ZNF205</i>     | -2.40 | -1.66 | -1.45 |
| NR_033956    | <i>P2RX7</i>      | -2.42 | -2.76 | 1.14  |

|              |                  |       |        |       |
|--------------|------------------|-------|--------|-------|
| NM_001190810 | <i>AGAP9</i>     | -2.43 | -1.70  | -1.44 |
| NM_002636    | <i>PHF1</i>      | -2.44 | -1.08  | -2.25 |
| NM_173558    | <i>FGD2</i>      | -2.44 | -2.46  | 1.01  |
| NM_001001555 | <i>GRB10</i>     | -2.46 | -3.36  | 1.37  |
| NM_001928    | <i>CFD</i>       | -2.46 | -2.85  | 1.16  |
| NM_052998    | <i>ADC</i>       | -2.48 | -1.46  | -1.70 |
| NM_139320    | <i>CHRFAM7A</i>  | -2.48 | -2.56  | 1.03  |
| NM_003649    | <i>DDO</i>       | -2.48 | -2.36  | -1.05 |
| NM_001040453 | <i>FAM63B</i>    | -2.48 | -1.35  | -1.84 |
| NM_001169107 | <i>FAM21C</i>    | -2.50 | -1.78  | -1.41 |
| NM_001130831 | <i>GAS7</i>      | -2.50 | -6.26  | 2.51  |
| NM_203416    | <i>CD163</i>     | -2.51 | -18.66 | 7.44  |
| NM_001195790 | <i>SLFN12L</i>   | -2.51 | 1.06   | -2.67 |
| NM_001172632 | <i>OLR1</i>      | -2.51 | 3.46   | -8.70 |
| NM_016483    | <i>PHF7</i>      | -2.52 | 1.04   | -2.61 |
| NM_002336    | <i>LRP6</i>      | -2.52 | -3.26  | 1.29  |
| NM_016347    | <i>NAT8B</i>     | -2.53 | -1.38  | -1.83 |
| NM_001166688 | <i>PFKM</i>      | -2.53 | -2.62  | 1.04  |
| NR_028500    | <i>LDHA</i>      | -2.54 | -3.93  | 1.55  |
| NM_001267584 | <i>UBOX5</i>     | -2.54 | -3.41  | 1.34  |
| NM_001243723 | <i>SETMAR</i>    | -2.55 | -1.46  | -1.74 |
| NM_019857    | <i>CTPS2</i>     | -2.55 | -2.65  | 1.04  |
| NM_001167594 | <i>CTSA</i>      | -2.55 | -1.24  | -2.05 |
| NM_145034    | <i>TOR1AIP2</i>  | -2.55 | -3.90  | 1.53  |
| NM_000573    | <i>CR1</i>       | -2.56 | -7.14  | 2.79  |
| NR_033243    | <i>UBAP1</i>     | -2.57 | -1.03  | -2.49 |
| NM_032367    | <i>ZBED3</i>     | -2.57 | -1.44  | -1.79 |
| NM_001258280 | <i>ZNF501</i>    | -2.57 | -1.29  | -1.99 |
| NM_152872    | <i>FAS</i>       | -2.57 | -2.67  | 1.04  |
| NR_027484    | <i>FCGR1C</i>    | -2.57 | -3.06  | 1.19  |
| NM_014398    | <i>LAMP3</i>     | -2.57 | -4.56  | 1.77  |
| NM_018844    | <i>BCAP29</i>    | -2.57 | -1.95  | -1.32 |
| NM_006744    | <i>RBP4</i>      | -2.58 | -1.05  | -2.45 |
| NM_130439    | <i>MXI1</i>      | -2.59 | -3.00  | 1.16  |
| NM_006770    | <i>MARCO</i>     | -2.59 | 2.88   | -7.49 |
| NR_033738    | <i>LOC440300</i> | -2.60 | -2.43  | -1.07 |
| NM_001253845 | <i>ADM2</i>      | -2.60 | -2.18  | -1.19 |
| NM_018441    | <i>PECR</i>      | -2.60 | -2.00  | -1.30 |
| NR_033950    | <i>P2RX7</i>     | -2.61 | -2.11  | -1.24 |
| NR_046324    | <i>CHRNA7</i>    | -2.61 | -3.59  | 1.37  |

|              |                 |       |       |       |
|--------------|-----------------|-------|-------|-------|
| NM_001206974 | <i>DHPS</i>     | -2.62 | -1.09 | -2.41 |
| NM_000072    | <i>CD36</i>     | -2.63 | -6.01 | 2.29  |
| NM_016577    | <i>RAB6B</i>    | -2.64 | -1.44 | -1.83 |
| NM_001258040 | <i>HARS</i>     | -2.65 | -1.99 | -1.33 |
| NM_001005374 | <i>LRSAM1</i>   | -2.67 | -1.89 | -1.41 |
| NM_001001522 | <i>TAGLN</i>    | -2.67 | -1.84 | -1.45 |
| NM_017688    | <i>BSPRY</i>    | -2.67 | -2.48 | -1.08 |
| NM_001522    | <i>GUCY2F</i>   | -2.69 | -2.26 | -1.19 |
| NM_001253823 | <i>BLVRA</i>    | -2.69 | -4.00 | 1.49  |
| NR_033955    | <i>P2RX7</i>    | -2.70 | -2.97 | 1.10  |
| NM_145267    | <i>C6orf57</i>  | -2.70 | -2.06 | -1.31 |
| NM_012224    | <i>NEK1</i>     | -2.70 | -3.08 | 1.14  |
| NM_000210    | <i>ITGA6</i>    | -2.70 | -2.09 | -1.29 |
| NM_199349    | <i>KCP</i>      | -2.72 | -2.03 | -1.34 |
| NM_015196    | <i>KIAA0922</i> | -2.73 | -4.24 | 1.55  |
| NM_001258249 | <i>UTY</i>      | -2.74 | 1.21  | -3.33 |
| NM_203386    | <i>RNH1</i>     | -2.75 | -1.82 | -1.51 |
| NM_032515    | <i>BOK</i>      | -2.75 | -2.42 | -1.14 |
| NR_002915    | <i>SNORA74A</i> | -2.77 | -3.63 | 1.31  |
| NM_001256430 | <i>STON2</i>    | -2.77 | -1.31 | -2.12 |
| NM_001003680 | <i>LEPR</i>     | -2.78 | -1.39 | -2.00 |
| NM_001242640 | <i>BRCC3</i>    | -2.78 | -3.39 | 1.22  |
| NM_133436    | <i>ASNS</i>     | -2.78 | -2.04 | -1.36 |
| NM_001003696 | <i>ATP5J</i>    | -2.81 | -1.42 | -1.97 |
| NM_001242902 | <i>AKAP1</i>    | -2.83 | -1.58 | -1.79 |
| NM_001166057 | <i>PEPD</i>     | -2.84 | -2.61 | -1.09 |
| NM_001135176 | <i>NEDD1</i>    | -2.84 | -2.68 | -1.06 |
| NM_001029955 | <i>DCAF4L1</i>  | -2.87 | -2.06 | -1.40 |
| NM_005845    | <i>ABCC4</i>    | -2.88 | -4.54 | 1.58  |
| NM_001145657 | <i>RAP1GAP</i>  | -2.88 | 2.05  | -5.90 |
| NM_001033551 | <i>TOM1L2</i>   | -2.88 | -1.14 | -2.53 |
| NM_005410    | <i>SEPP1</i>    | -2.89 | -6.16 | 2.13  |
| NR_045213    | <i>FCGR1B</i>   | -2.90 | -3.63 | 1.25  |
| NM_183005    | <i>RPP38</i>    | -2.90 | -1.51 | -1.92 |
| NM_006207    | <i>PDGFRL</i>   | -2.91 | -2.53 | -1.15 |
| NM_003711    | <i>PPAP2A</i>   | -2.91 | -2.46 | -1.18 |
| NM_032438    | <i>L3MBTL3</i>  | -2.92 | -2.29 | -1.28 |
| NM_001251888 | <i>ASPSCR1</i>  | -2.93 | -1.45 | -2.01 |
| NM_000305    | <i>PON2</i>     | -2.93 | -2.90 | -1.01 |
| NM_033104    | <i>STON2</i>    | -2.94 | -1.21 | -2.43 |

|                |                     |       |       |        |
|----------------|---------------------|-------|-------|--------|
| NM_014787      | <i>DNAJC6</i>       | -2.95 | -1.83 | -1.61  |
| NM_003083      | <i>SNAPC2</i>       | -2.95 | -1.38 | -2.15  |
| NM_007293.8    | <i>C4A</i>          | -2.96 | -1.98 | -1.49  |
| NM_001002029.1 | <i>C4B</i>          | -2.96 | -2.01 | -1.47  |
| NM_001242823.1 | <i>LOC100293534</i> | -2.96 | -2.01 | -1.47  |
| NM_152998      | <i>EZH2</i>         | -2.96 | -4.14 | 1.40   |
| NM_001014975   | <i>CFH</i>          | -2.96 | -2.78 | -1.07  |
| NM_182676      | <i>PLTP</i>         | -2.97 | -1.23 | -2.43  |
| NM_001164755   | <i>ASPH</i>         | -2.99 | -4.65 | 1.55   |
| NM_194436      | <i>LDHD</i>         | -3.00 | -1.24 | -2.42  |
| NM_003039      | <i>SLC2A5</i>       | -3.00 | -5.28 | 1.76   |
| NM_033128      | <i>SCIN</i>         | -3.02 | -1.39 | -2.17  |
| NM_001032282   | <i>KLF10</i>        | -3.03 | -4.03 | 1.33   |
| NM_001178008   | <i>CBS</i>          | -3.03 | -2.19 | -1.38  |
| NM_001166356   | <i>SHMT2</i>        | -3.06 | -1.65 | -1.85  |
| NM_021914      | <i>CFL2</i>         | -3.06 | -1.45 | -2.11  |
| NM_194322      | <i>OTOF</i>         | -3.08 | -1.13 | -2.73  |
| NM_002187      | <i>IL12B</i>        | -3.09 | 4.94  | -15.28 |
| NR_045555      | <i>ENPP2</i>        | -3.12 | -4.77 | 1.53   |
| NM_001145145   | <i>SLC1A5</i>       | -3.13 | -1.51 | -2.07  |
| NM_001172746   | <i>SEC23B</i>       | -3.16 | -1.46 | -2.17  |
| NM_174902      | <i>LDLRAD3</i>      | -3.17 | -8.48 | 2.68   |
| NM_001100428   | <i>RAP1GDS1</i>     | -3.18 | -1.18 | -2.70  |
| NR_073097      | <i>TRAPPC3</i>      | -3.19 | -1.03 | -3.08  |
| NM_182762      | <i>MACC1</i>        | -3.19 | -1.23 | -2.59  |
| NM_001206897   | <i>ALDH1A2</i>      | -3.20 | -1.16 | -2.74  |
| NM_138712      | <i>PPARG</i>        | -3.20 | 1.26  | -4.04  |
| NM_152536      | <i>FGD5</i>         | -3.21 | 1.56  | -4.99  |
| NM_002397      | <i>MEF2C</i>        | -3.24 | -4.77 | 1.47   |
| NR_033954      | <i>P2RX7</i>        | -3.24 | -2.87 | -1.13  |
| NM_002873      | <i>RAD17</i>        | -3.24 | -3.74 | 1.15   |
| NM_001033025   | <i>EXTL2</i>        | -3.26 | -4.50 | 1.38   |
| NM_001193431   | <i>PTPN22</i>       | -3.28 | -1.59 | -2.06  |
| NM_001439      | <i>EXTL2</i>        | -3.28 | -3.90 | 1.19   |
| NR_027752      | <i>ALDH1L2</i>      | -3.30 | -3.23 | -1.02  |
| NM_138971      | <i>BACE1</i>        | -3.31 | -2.92 | -1.13  |
| NR_045103      | <i>RNF146</i>       | -3.33 | -2.64 | -1.26  |
| NM_201432      | <i>GAS7</i>         | -3.33 | -6.07 | 1.82   |
| NM_018848      | <i>MKKS</i>         | -3.34 | -2.09 | -1.60  |
| NM_004235      | <i>KLF4</i>         | -3.36 | -1.43 | -2.36  |

|              |                 |       |        |       |
|--------------|-----------------|-------|--------|-------|
| NM_001766    | <i>CD1D</i>     | -3.37 | -3.48  | 1.03  |
| NM_001764    | <i>CD1B</i>     | -3.39 | 1.00   | -3.39 |
| NM_003088    | <i>FSCN1</i>    | -3.39 | -11.54 | 3.40  |
| NM_181526    | <i>MYL9</i>     | -3.43 | -1.23  | -2.80 |
| NM_001258291 | <i>PRSS36</i>   | -3.44 | -1.43  | -2.41 |
| NM_054012    | <i>ASS1</i>     | -3.44 | -5.68  | 1.65  |
| NM_001242768 | <i>MTHFD1L</i>  | -3.45 | -3.71  | 1.08  |
| NM_001174092 | <i>TMEM185A</i> | -3.46 | -2.23  | -1.55 |
| NM_001101801 | <i>FAM13B</i>   | -3.46 | -3.88  | 1.12  |
| NR_073037    | <i>STOM</i>     | -3.46 | -3.22  | -1.08 |
| NR_038335    | <i>CLU</i>      | -3.48 | -2.39  | -1.46 |
| NM_001033045 | <i>GPR155</i>   | -3.48 | -1.26  | -2.76 |
| NM_001146008 | <i>SLCO5A1</i>  | -3.52 | -12.01 | 3.41  |
| NM_004244    | <i>CD163</i>    | -3.52 | -25.98 | 7.38  |
| NR_037582    | <i>AP3S2</i>    | -3.56 | -1.83  | -1.94 |
| NM_004181    | <i>UCHL1</i>    | -3.57 | -3.81  | 1.07  |
| NM_006398.3  | <i>UBD</i>      | -3.57 | -6.29  | 1.76  |
| NM_014488    | <i>RAB30</i>    | -3.58 | -3.39  | -1.06 |
| NM_001243752 | <i>C7orf49</i>  | -3.62 | -2.11  | -1.71 |
| NM_001177507 | <i>AOAH</i>     | -3.62 | -5.49  | 1.51  |
| NM_198436    | <i>AURKA</i>    | -3.66 | -1.13  | -3.24 |
| NM_001206984 | <i>METTL23</i>  | -3.68 | -1.43  | -2.58 |
| NM_001976    | <i>ENO3</i>     | -3.69 | -1.98  | -1.87 |
| NM_001243755 | <i>C7orf49</i>  | -3.70 | -1.20  | -3.08 |
| NM_001025197 | <i>CHI3L2</i>   | -3.74 | -3.70  | -1.01 |
| NM_001171158 | <i>SIGLEC10</i> | -3.75 | -2.77  | -1.36 |
| NM_001040092 | <i>ENPP2</i>    | -3.75 | -10.79 | 2.88  |
| NM_138790    | <i>PLD4</i>     | -3.76 | -1.11  | -3.39 |
| NM_138972    | <i>BACE1</i>    | -3.77 | -2.60  | -1.45 |
| NM_001256909 | <i>CYBRD1</i>   | -3.78 | -4.39  | 1.16  |
| NM_001271852 | <i>CEP57L1</i>  | -3.95 | -1.30  | -3.03 |
| NM_001042402 | <i>NAAA</i>     | -3.96 | -3.76  | -1.05 |
| NM_000071    | <i>CBS</i>      | -4.06 | -2.69  | -1.51 |
| NM_001130859 | <i>PPIP5K1</i>  | -4.09 | -4.11  | 1.01  |
| NM_000857    | <i>GUCY1B3</i>  | -4.09 | -6.51  | 1.59  |
| NM_001127383 | <i>CYBRD1</i>   | -4.11 | -3.05  | -1.35 |
| NM_152348    | <i>WDR81</i>    | -4.13 | -1.13  | -3.67 |
| NM_001128933 | <i>SYNPO2</i>   | -4.14 | -8.34  | 2.01  |
| NM_001099    | <i>ACPP</i>     | -4.18 | -3.59  | -1.16 |
| NM_016324    | <i>ZNF274</i>   | -4.22 | -1.54  | -2.74 |

|              |                  |        |        |       |
|--------------|------------------|--------|--------|-------|
| NM_006623    | <i>PHGDH</i>     | -4.23  | -3.63  | -1.17 |
| NM_016201    | <i>AMOTL2</i>    | -4.42  | -7.11  | 1.61  |
| NM_004447    | <i>EPS8</i>      | -4.46  | -4.46  | 1.00  |
| NM_001013398 | <i>IGFBP3</i>    | -4.52  | -21.74 | 4.81  |
| NM_015900    | <i>PLA1A</i>     | -4.52  | -2.11  | -2.14 |
| NM_001127493 | <i>ANK2</i>      | -4.55  | -3.69  | -1.23 |
| NM_001018056 | <i>VLDLR</i>     | -4.58  | -5.66  | 1.23  |
| NM_004384    | <i>CSNK1G3</i>   | -4.59  | -3.93  | -1.17 |
| NM_001127242 | <i>BBC3</i>      | -4.65  | -3.04  | -1.53 |
| NM_002852    | <i>PTX3</i>      | -4.73  | -5.51  | 1.17  |
| NR_037775    | <i>MIA-RAB4B</i> | -4.81  | -1.74  | -2.76 |
| NM_001001550 | <i>GRB10</i>     | -4.82  | -4.60  | -1.05 |
| NM_001130687 | <i>GUCY1A3</i>   | -4.84  | -6.32  | 1.30  |
| NM_001128934 | <i>SYNPO2</i>    | -4.88  | -7.28  | 1.49  |
| NM_001148    | <i>ANK2</i>      | -4.92  | -5.35  | 1.09  |
| NM_001134194 | <i>ACPP</i>      | -4.93  | -4.39  | -1.12 |
| NM_002416    | <i>CXCL9</i>     | -5.06  | -5.15  | 1.02  |
| NR_046480    | <i>ROGDI</i>     | -5.08  | -1.09  | -4.64 |
| NM_021101    | <i>CLDN1</i>     | -5.08  | -1.20  | -4.22 |
| NM_001130723 | <i>AHCYL2</i>    | -5.33  | -12.04 | 2.26  |
| NM_001142345 | <i>CMKLR1</i>    | -5.39  | -1.92  | -2.81 |
| NM_001034173 | <i>ALDH1L2</i>   | -5.56  | -4.98  | -1.12 |
| NM_000598    | <i>IGFBP3</i>    | -5.74  | -30.36 | 5.29  |
| NM_001006605 | <i>FAM69A</i>    | -5.89  | -4.97  | -1.18 |
| NM_001130863 | <i>ENPP2</i>     | -6.30  | -14.56 | 2.31  |
| NM_001242948 | <i>EPDR1</i>     | -6.30  | -3.37  | -1.87 |
| NM_001024845 | <i>SLC6A9</i>    | -6.39  | -4.13  | -1.55 |
| NM_001221    | <i>CAMK2D</i>    | -6.68  | -2.23  | -3.00 |
| NM_001130683 | <i>GUCY1A3</i>   | -7.04  | -8.88  | 1.26  |
| NM_021154    | <i>PSAT1</i>     | -8.17  | -3.61  | -2.27 |
| NM_005409    | <i>CXCL11</i>    | -8.89  | -7.88  | -1.13 |
| NM_001565    | <i>CXCL10</i>    | -12.64 | -8.26  | -1.53 |

**Table S2.** Transcripts that are uniquely and significantly differentially expressed in Mob-MDM(LPS/IFN $\gamma$ ) compared to both M-MDM(LPS/IFN $\gamma$ ) and GM-MDM(LPS/IFN $\gamma$ ).

|                             |         | Fold Change                              |                                         |                                          |
|-----------------------------|---------|------------------------------------------|-----------------------------------------|------------------------------------------|
| RefSeq transcript ID        | Symbol  | Mob-<br>MDM(LPS/IFN $\gamma$ )           | Mob-<br>MDM(LPS/IFN $\gamma$ )          | M-<br>MDM(LPS/IFN $\gamma$ )             |
|                             |         | <i>vs.</i> GM-<br>MDM(LPS/IFN $\gamma$ ) | <i>vs.</i> M-<br>MDM(LPS/IFN $\gamma$ ) | <i>vs.</i> GM-<br>MDM(LPS/IFN $\gamma$ ) |
| Cytokines and Chemokines    |         |                                          |                                         |                                          |
| NM_000758                   | CSF2    | 38.14                                    | 47.90                                   | -1.26                                    |
| NM_000619                   | IFNG    | 34.43                                    | 22.54                                   | 1.53                                     |
| NM_002994                   | CXCL5   | 27.00                                    | 18.59                                   | 1.45                                     |
| NM_172219                   | CSF3    | 17.84                                    | 16.66                                   | 1.07                                     |
| NR_046035                   | CXCL1   | 12.45                                    | 7.96                                    | 1.56                                     |
| NR_033662                   | CSF3    | 10.17                                    | 13.61                                   | -1.34                                    |
| NM_019618                   | IL36G   | 9.73                                     | 10.75                                   | -1.10                                    |
| NM_000576                   | IL1B    | 9.52                                     | 10.43                                   | -1.09                                    |
| NM_001511                   | CXCL1   | 7.34                                     | 8.90                                    | -1.21                                    |
| NM_002090                   | CXCL3   | 6.26                                     | 3.17                                    | 1.97                                     |
| NM_002089                   | CXCL2   | 4.51                                     | 3.87                                    | 1.16                                     |
| NM_002984                   | CCL4    | 3.90                                     | 2.90                                    | 1.35                                     |
| NM_020530                   | OSM     | 3.75                                     | 5.81                                    | -1.55                                    |
| NM_000639                   | FASLG   | 3.10                                     | 2.51                                    | 1.24                                     |
| NM_002983                   | CCL3    | 2.97                                     | 3.31                                    | -1.12                                    |
| NM_001172128                | IL16    | 2.60                                     | 3.46                                    | -1.33                                    |
| NM_001198624                | TNFSF13 | 2.28                                     | 3.04                                    | -1.33                                    |
| NM_002416                   | CXCL9   | -5.06                                    | -5.15                                   | 1.02                                     |
| NM_005409                   | CXCL11  | -8.89                                    | -7.88                                   | -1.13                                    |
| NM_001565                   | CXCL10  | -12.64                                   | -8.26                                   | -1.53                                    |
| G-protein coupled receptors |         |                                          |                                         |                                          |
| NM_006564                   | CXCR6   | 6.93                                     | 7.04                                    | -1.02                                    |
| NM_013308                   | GPR171  | 4.15                                     | 3.84                                    | 1.08                                     |
| NM_001008540                | CXCR4   | 4.06                                     | 3.49                                    | 1.16                                     |
| NM_001992                   | F2R     | 3.46                                     | 3.37                                    | 1.03                                     |
| NM_001271749                | GPR77   | 2.45                                     | 2.64                                    | -1.08                                    |
| NM_003467                   | CXCR4   | 2.31                                     | 2.06                                    | 1.12                                     |
| NM_005508                   | CCR4    | 2.23                                     | 2.23                                    | 1.00                                     |
| Growth Factors              |         |                                          |                                         |                                          |
| NM_004883                   | NRG2    | -2.34                                    | -4.64                                   | 1.98                                     |

| <b>Ion Channels</b> |                |       |       |       |
|---------------------|----------------|-------|-------|-------|
| NM_002561           | <i>P2RX5</i>   | 8.27  | 10.28 | -1.24 |
| NM_001680           | <i>FXVD2</i>   | 3.98  | 3.98  | 1.00  |
| NM_001204519        | <i>P2RX5</i>   | 3.81  | 2.89  | 1.32  |
| NM_001177428        | <i>TRPV4</i>   | 2.85  | 4.41  | -1.54 |
| NM_002224           | <i>ITPR3</i>   | 2.48  | 2.57  | -1.04 |
| NM_002562           | <i>P2RX7</i>   | -2.09 | -2.12 | 1.02  |
| NM_002977           | <i>SCN9A</i>   | -2.31 | -2.16 | -1.07 |
| NR_033956           | <i>P2RX7</i>   | -2.42 | -2.76 | 1.14  |
| NR_033950           | <i>P2RX7</i>   | -2.61 | -2.11 | -1.24 |
| NR_033955           | <i>P2RX7</i>   | -2.70 | -2.97 | 1.10  |
| NR_033954           | <i>P2RX7</i>   | -3.24 | -2.87 | -1.13 |
| <b>Kinases</b>      |                |       |       |       |
| NM_005356           | <i>LCK</i>     | 7.92  | 7.92  | 1.00  |
| NM_001042600        | <i>MAP4K1</i>  | 6.57  | 5.59  | 1.17  |
| NM_001079           | <i>ZAP70</i>   | 5.65  | 5.02  | 1.12  |
| NM_006257           | <i>PRKCQ</i>   | 5.04  | 3.62  | 1.39  |
| NM_032415           | <i>CARD11</i>  | 4.32  | 4.84  | -1.12 |
| NM_000245           | <i>MET</i>     | 3.93  | 5.07  | -1.29 |
| NM_004336           | <i>BUB1</i>    | 3.65  | 4.44  | -1.22 |
| NM_005030           | <i>PLK1</i>    | 3.39  | 2.90  | 1.17  |
| NM_001786           | <i>CDK1</i>    | 3.20  | 2.76  | 1.16  |
| NM_016441           | <i>CRIM1</i>   | 3.06  | 3.12  | -1.02 |
| NM_002082           | <i>GRK6</i>    | 2.97  | 2.51  | 1.18  |
| NM_001211           | <i>BUB1B</i>   | 2.76  | 2.94  | -1.06 |
| NM_001161560        | <i>TNIK</i>    | 2.73  | 2.27  | 1.20  |
| NM_001161562        | <i>TNIK</i>    | 2.53  | 2.10  | 1.21  |
| NM_031966           | <i>CCNB1</i>   | 2.38  | 2.87  | -1.21 |
| NM_004217           | <i>AURKB</i>   | 2.36  | 2.54  | -1.08 |
| NM_006096           | <i>NDRG1</i>   | 2.35  | 2.26  | 1.04  |
| NM_001570           | <i>IRAK2</i>   | 2.27  | 3.06  | -1.35 |
| NM_001274           | <i>CHEK1</i>   | 2.11  | 2.19  | -1.04 |
| NM_004834           | <i>MAP4K4</i>  | 2.05  | 2.57  | -1.25 |
| NR_073531           | <i>STK25</i>   | -2.16 | -2.59 | 1.20  |
| NM_020397           | <i>CAMK1D</i>  | -2.31 | -2.12 | -1.09 |
| NM_001166688        | <i>PFKM</i>    | -2.53 | -2.62 | 1.04  |
| NM_001522           | <i>GUCY2F</i>  | -2.69 | -2.26 | -1.19 |
| NM_012224           | <i>NEK1</i>    | -2.70 | -3.08 | 1.14  |
| NM_006207           | <i>PDGFRL</i>  | -2.91 | -2.53 | -1.15 |
| NM_004384           | <i>CSNK1G3</i> | -4.59 | -3.93 | -1.17 |

|                      |                 |       |       |       |
|----------------------|-----------------|-------|-------|-------|
| <b>Peptidases</b>    |                 |       |       |       |
| NM_006144            | <i>GZMA</i>     | 5.8   | 5.1   | 1.1   |
| NM_033423            | <i>GZMH</i>     | 5.2   | 3.5   | 1.5   |
| NM_080722            | <i>ADAMTS14</i> | 3.7   | 2.2   | 1.7   |
| NM_139155            | <i>ADAMTS14</i> | 3.7   | 2.2   | 1.7   |
| NM_007287            | <i>MME</i>      | 3.5   | 3.1   | 1.1   |
| NM_001335            | <i>CTSW</i>     | 2.6   | 3.5   | -1.4  |
| NM_022468            | <i>MMP25</i>    | -2.2  | -2.8  | 1.3   |
| NM_001928            | <i>CFD</i>      | -2.5  | -2.9  | 1.2   |
| NM_138971            | <i>BACE1</i>    | -3.3  | -2.9  | -1.1  |
| NM_004181            | <i>UCHL1</i>    | -3.6  | -3.8  | 1.1   |
| NM_138972            | <i>BACE1</i>    | -3.8  | -2.6  | -1.5  |
| NM_004447            | <i>EPS8</i>     | -4.5  | -4.5  | 1.0   |
| <b>Phosphatases</b>  |                 |       |       |       |
| NM_001789            | <i>CDC25A</i>   | 2.63  | 2.61  | 1.01  |
| NM_014750            | <i>DLGAP5</i>   | 2.25  | 2.25  | 1.00  |
| NM_003711            | <i>PPAP2A</i>   | -2.91 | -2.46 | -1.18 |
| NM_001130859         | <i>PPIP5K1</i>  | -4.09 | -4.11 | 1.01  |
| NM_001099            | <i>ACPP</i>     | -4.18 | -3.59 | -1.16 |
| NM_001134194         | <i>ACPP</i>     | -4.93 | -4.39 | -1.12 |
| <b>Other Enzymes</b> |                 |       |       |       |
| NM_000096            | <i>CP</i>       | 21.10 | 19.66 | 1.07  |
| NM_001034            | <i>RRM2</i>     | 12.53 | 13.10 | -1.05 |
| NR_046371            | <i>CP</i>       | 9.91  | 7.26  | 1.36  |
| NM_001071            | <i>TYMS</i>     | 8.53  | 5.47  | 1.56  |
| NM_052838            | <i>SEPT1</i>    | 7.35  | 5.06  | 1.45  |
| NM_206925            | <i>CA12</i>     | 5.83  | 4.34  | 1.34  |
| NM_001144970         | <i>NEDD4L</i>   | 5.25  | 3.34  | 1.57  |
| NM_001243121         | <i>PDE4A</i>    | 4.82  | 2.97  | 1.62  |
| NM_001067            | <i>TOP2A</i>    | 4.81  | 5.10  | -1.06 |
| NM_001218            | <i>CA12</i>     | 4.59  | 4.68  | -1.02 |
| NM_002263.1          | <i>KIFC1</i>    | 4.55  | 4.61  | -1.01 |
| NM_002875            | <i>RAD51</i>    | 3.92  | 2.97  | 1.32  |
| NM_001165931         | <i>RRM2</i>     | 3.48  | 3.48  | 1.00  |
| NM_005916            | <i>MCM7</i>     | 3.43  | 2.91  | 1.18  |
| NM_001197221         | <i>PDE4D</i>    | 3.25  | 3.90  | -1.20 |
| NM_014875            | <i>KIF14</i>    | 2.90  | 2.90  | 1.00  |
| NM_004130            | <i>GYG1</i>     | 2.80  | 3.00  | -1.07 |
| NM_006907            | <i>PYCR1</i>    | 2.77  | 2.76  | 1.01  |
| NM_017640            | <i>LRRC16A</i>  | 2.69  | 2.40  | 1.12  |

|              |                 |       |       |       |
|--------------|-----------------|-------|-------|-------|
| NM_003579    | <i>RAD54L</i>   | 2.65  | 2.64  | 1.00  |
| NM_012168    | <i>FBXO2</i>    | 2.60  | 2.60  | 1.00  |
| NM_001017420 | <i>ESCO2</i>    | 2.46  | 2.29  | 1.08  |
| NM_001017917 | <i>CYB561</i>   | 2.45  | 2.34  | 1.04  |
| NM_021615    | <i>CHST6</i>    | 2.39  | 2.61  | -1.09 |
| NM_002528    | <i>NTHL1</i>    | 2.03  | 2.45  | -1.21 |
| NM_001185074 | <i>ZCCHC6</i>   | 2.02  | 2.53  | -1.25 |
| NM_015723    | <i>PNPLA8</i>   | 2.01  | 2.90  | -1.45 |
| NM_020142    | <i>NDUFA4L2</i> | -2.01 | -2.10 | 1.05  |
| NM_152305    | <i>POGLUT1</i>  | -2.11 | -3.99 | 1.89  |
| NM_001200029 | <i>HYAL3</i>    | -2.14 | -2.67 | 1.25  |
| NM_006227    | <i>PLTP</i>     | -2.21 | -2.07 | -1.07 |
| NM_001184718 | <i>TIPARP</i>   | -2.26 | -2.71 | 1.20  |
| NM_001146155 | <i>PTGR2</i>    | -2.30 | -2.10 | -1.09 |
| NM_012166    | <i>FBXO10</i>   | -2.33 | -2.41 | 1.03  |
| NM_001242921 | <i>PLTP</i>     | -2.34 | -2.16 | -1.08 |
| NM_003649    | <i>DDO</i>      | -2.48 | -2.36 | -1.05 |
| NR_028500    | <i>LDHA</i>     | -2.54 | -3.93 | 1.55  |
| NM_001267584 | <i>UBOX5</i>    | -2.54 | -3.41 | 1.34  |
| NM_019857    | <i>CTPS2</i>    | -2.55 | -2.65 | 1.04  |
| NM_018441    | <i>PECR</i>     | -2.60 | -2.00 | -1.30 |
| NM_001253823 | <i>BLVRA</i>    | -2.69 | -4.00 | 1.49  |
| NM_001242640 | <i>BRCC3</i>    | -2.78 | -3.39 | 1.22  |
| NM_133436    | <i>ASNS</i>     | -2.78 | -2.04 | -1.36 |
| NM_000305    | <i>PON2</i>     | -2.93 | -2.90 | -1.01 |
| NM_001164755 | <i>ASPH</i>     | -2.99 | -4.65 | 1.55  |
| NM_001178008 | <i>CBS</i>      | -3.03 | -2.19 | -1.38 |
| NR_045555    | <i>ENPP2</i>    | -3.12 | -4.77 | 1.53  |
| NM_002873    | <i>RAD17</i>    | -3.24 | -3.74 | 1.15  |
| NM_001033025 | <i>EXTL2</i>    | -3.26 | -4.50 | 1.38  |
| NM_001439    | <i>EXTL2</i>    | -3.28 | -3.90 | 1.19  |
| NR_027752    | <i>ALDH1L2</i>  | -3.30 | -3.23 | -1.02 |
| NR_045103    | <i>RNF146</i>   | -3.33 | -2.64 | -1.26 |
| NM_054012    | <i>ASS1</i>     | -3.44 | -5.68 | 1.65  |
| NM_001242768 | <i>MTHFD1L</i>  | -3.45 | -3.71 | 1.08  |
| NM_014488    | <i>RAB30</i>    | -3.58 | -3.39 | -1.06 |
| NM_001177507 | <i>AOAH</i>     | -3.62 | -5.49 | 1.51  |
| NM_001025197 | <i>CHI3L2</i>   | -3.74 | -3.70 | -1.01 |
| NM_001256909 | <i>CYBRD1</i>   | -3.78 | -4.39 | 1.16  |
| NM_001042402 | <i>NAAA</i>     | -3.96 | -3.76 | -1.05 |

|                                 |                |       |       |       |
|---------------------------------|----------------|-------|-------|-------|
| NM_000071                       | <i>CBS</i>     | -4.06 | -2.69 | -1.51 |
| NM_000857                       | <i>GUCY1B3</i> | -4.09 | -6.51 | 1.59  |
| NM_006623                       | <i>PHGDH</i>   | -4.23 | -3.63 | -1.17 |
| NM_001130687                    | <i>GUCY1A3</i> | -4.84 | -6.32 | 1.30  |
| NM_001034173                    | <i>ALDH1L2</i> | -5.56 | -4.98 | -1.12 |
| N22:77M_001130683               | <i>GUCY1A3</i> | -7.04 | -8.88 | 1.26  |
| <b>Transcription Regulators</b> |                |       |       |       |
| NM_030915                       | <i>LBH</i>     | 8.14  | 5.32  | 1.53  |
| NM_005442                       | <i>EOMES</i>   | 7.25  | 4.92  | 1.48  |
| NM_002466                       | <i>MYBL2</i>   | 7.19  | 6.33  | 1.13  |
| NM_004430                       | <i>EGR3</i>    | 5.59  | 4.98  | 1.12  |
| NM_001131010                    | <i>SATB1</i>   | 5.50  | 4.42  | 1.25  |
| NM_004091                       | <i>E2F2</i>    | 4.86  | 4.72  | 1.03  |
| NM_005225                       | <i>E2F1</i>    | 3.79  | 5.86  | -1.55 |
| NM_002467                       | <i>MYC</i>     | 3.78  | 2.84  | 1.33  |
| NM_012481                       | <i>IKZF3</i>   | 3.50  | 3.03  | 1.16  |
| NM_001257410                    | <i>IKZF3</i>   | 3.32  | 2.66  | 1.24  |
| NM_024007                       | <i>EBF1</i>    | 3.25  | 3.01  | 1.08  |
| NM_001262                       | <i>CDKN2C</i>  | 3.23  | 2.54  | 1.27  |
| NM_012258                       | <i>HEY1</i>    | 3.14  | 3.91  | -1.25 |
| NM_013282                       | <i>UHRF1</i>   | 3.07  | 2.71  | 1.13  |
| NM_021953                       | <i>FOXO1</i>   | 2.78  | 3.54  | -1.28 |
| NM_022898                       | <i>BCL11B</i>  | 2.52  | 2.30  | 1.10  |
| NM_173091                       | <i>NFATC2</i>  | 2.51  | 2.51  | 1.00  |
| NM_004936                       | <i>CDKN2B</i>  | 2.42  | 2.07  | 1.17  |
| NM_001202514                    | <i>MXD1</i>    | 2.42  | 2.66  | -1.10 |
| NM_199185                       | <i>NPM1</i>    | 2.39  | 2.18  | 1.10  |
| NM_001170794                    | <i>BACH2</i>   | 2.23  | 3.56  | -1.59 |
| NM_002357                       | <i>MXD1</i>    | 2.12  | 2.43  | -1.14 |
| NM_015517                       | <i>HINFP</i>   | -2.03 | -2.22 | 1.09  |
| NR_045568                       | <i>IRF3</i>    | -2.08 | -2.77 | 1.33  |
| NM_001126115                    | <i>TP53</i>    | -2.13 | -2.66 | 1.25  |
| NM_001248003                    | <i>ARNTL2</i>  | -2.20 | -3.03 | 1.38  |
| NM_001243228                    | <i>TCF4</i>    | -2.28 | -3.55 | 1.56  |
| NM_023001                       | <i>ARID4A</i>  | -2.32 | -2.14 | -1.08 |
| NM_130439                       | <i>MXI1</i>    | -2.59 | -3.00 | 1.16  |
| NM_152998                       | <i>EZH2</i>    | -2.96 | -4.14 | 1.40  |
| NM_001032282                    | <i>KLF10</i>   | -3.03 | -4.03 | 1.33  |
| NM_002397                       | <i>MEF2C</i>   | -3.24 | -4.77 | 1.47  |
| NM_201432                       | <i>GAS7</i>    | -3.33 | -6.07 | 1.82  |

| <b>Transmembrane Receptors</b>            |                |       |       |       |
|-------------------------------------------|----------------|-------|-------|-------|
| NM_001767                                 | <i>CD2</i>     | 14.85 | 11.00 | 1.35  |
| NM_000733                                 | <i>CD3E</i>    | 8.18  | 7.71  | 1.06  |
| NM_012092                                 | <i>ICOS</i>    | 7.04  | 6.73  | 1.04  |
| NM_000655                                 | <i>SELL</i>    | 6.12  | 5.45  | 1.12  |
| NM_006725                                 | <i>CD6</i>     | 5.79  | 5.46  | 1.06  |
| NM_001559                                 | <i>IL12RB2</i> | 5.00  | 5.00  | 1.00  |
| NM_003853                                 | <i>IL18RAP</i> | 4.92  | 4.44  | 1.11  |
| NM_000734                                 | <i>CD247</i>   | 4.56  | 5.37  | -1.18 |
| NM_000732                                 | <i>CD3D</i>    | 4.20  | 4.20  | 1.00  |
| NM_001258216                              | <i>IL12RB2</i> | 3.72  | 3.21  | 1.16  |
| NM_014207                                 | <i>CD5</i>     | 3.32  | 2.86  | 1.16  |
| NM_001099439                              | <i>EPHA10</i>  | 3.04  | 3.03  | 1.00  |
| NM_000073                                 | <i>CD3G</i>    | 2.77  | 2.77  | 1.00  |
| NM_003855                                 | <i>IL18R1</i>  | 2.65  | 2.57  | 1.03  |
| NR_028076                                 | <i>SCARF1</i>  | 2.22  | 2.17  | 1.02  |
| NM_000043                                 | <i>FAS</i>     | -2.08 | -2.77 | 1.33  |
| NM_001242636                              | <i>IL31RA</i>  | -2.17 | -2.22 | 1.02  |
| NM_000566                                 | <i>FCGR1A</i>  | -2.17 | -2.38 | 1.10  |
| NM_001244910                              | <i>FCGR1B</i>  | -2.19 | -2.84 | 1.29  |
| NM_001017986                              | <i>FCGR1B</i>  | -2.38 | -3.19 | 1.34  |
| NM_002336                                 | <i>LRP6</i>    | -2.52 | -3.26 | 1.29  |
| NM_152872                                 | <i>FAS</i>     | -2.57 | -2.67 | 1.04  |
| NR_027484                                 | <i>FCGR1C</i>  | -2.57 | -3.06 | 1.19  |
| NR_046324                                 | <i>CHRNA7</i>  | -2.61 | -3.59 | 1.37  |
| NM_000210                                 | <i>ITGA6</i>   | -2.70 | -2.09 | -1.29 |
| NR_045213                                 | <i>FCGR1B</i>  | -2.90 | -3.63 | 1.25  |
| <b>Ligand-dependent nuclear receptors</b> |                |       |       |       |
| NM_001202233                              | <i>NR4A1</i>   | 3.44  | 4.16  | -1.21 |
| NM_006186                                 | <i>NR4A2</i>   | 2.71  | 3.16  | -1.16 |
| NM_134262                                 | <i>RORA</i>    | 2.63  | 2.69  | -1.02 |
| NM_001042728                              | <i>RARG</i>    | 2.60  | 3.05  | -1.17 |
| <b>Transporters</b>                       |                |       |       |       |
| NM_003645                                 | <i>SLC27A2</i> | 6.39  | 5.92  | 1.08  |
| NM_004603                                 | <i>STX1A</i>   | 3.92  | 2.47  | 1.59  |
| NM_005733                                 | <i>KIF20A</i>  | 3.56  | 3.44  | 1.04  |
| NM_001136232                              | <i>SEC13</i>   | 3.46  | 2.50  | 1.38  |
| NM_000228                                 | <i>LAMB3</i>   | 2.99  | 2.45  | 1.22  |
| NM_014331                                 | <i>SLC7A11</i> | 2.91  | 2.67  | 1.09  |

|                |           |       |       |       |
|----------------|-----------|-------|-------|-------|
| NR_024273      | SEC13     | 2.88  | 2.65  | 1.09  |
| NM_178859      | SLC51B    | 2.45  | 3.48  | -1.42 |
| NM_003786      | ABCC3     | 2.01  | 2.80  | -1.39 |
| NM_024490      | ATP10A    | -2.01 | -2.19 | 1.09  |
| NM_001112802   | SLC8A1    | -2.02 | -2.48 | 1.23  |
| NM_001089      | ABCA3     | -2.15 | -3.45 | 1.61  |
| NM_001271711   | SLC2A8    | -2.40 | -2.15 | -1.12 |
| NM_005845      | ABCC4     | -2.88 | -4.54 | 1.58  |
| NM_003039      | SLC2A5    | -3.00 | -5.28 | 1.76  |
| NM_001018056   | VLDLR     | -4.58 | -5.66 | 1.23  |
| NM_001024845   | SLC6A9    | -6.39 | -4.13 | -1.55 |
| <b>Others</b>  |           |       |       |       |
| NM_003537      | HIST1H3B  | 16.97 | 14.05 | 1.21  |
| NM_003531      | HIST1H3C  | 16.43 | 11.00 | 1.49  |
| NM_003534      | HIST1H3G  | 15.88 | 11.89 | 1.34  |
| NM_005322      | HIST1H1B  | 13.48 | 6.97  | 1.93  |
| NM_001005464.1 | HIST2H3A  | 13.48 | 8.08  | 1.67  |
| NM_021059.1    | HIST2H3C  | 13.48 | 8.08  | 1.67  |
| NM_021066      | HIST1H2AJ | 12.50 | 8.81  | 1.42  |
| NM_003521      | HIST1H2BM | 12.44 | 9.80  | 1.27  |
| NM_003511      | HIST1H2AL | 10.45 | 6.26  | 1.67  |
| NM_021018      | HIST1H3F  | 10.00 | 6.18  | 1.62  |
| NM_003535      | HIST1H3J  | 8.74  | 7.73  | 1.13  |
| NM_001161443   | SH2D2A    | 8.23  | 6.96  | 1.18  |
| NM_024508      | ZBED2     | 7.81  | 5.77  | 1.35  |
| NM_052916      | RNF157    | 7.76  | 7.44  | 1.04  |
| NM_001005464   | HIST2H3A  | 7.70  | 7.51  | 1.03  |
| NM_021059      | HIST2H3C  | 7.70  | 7.51  | 1.03  |
| NM_001083116   | PRF1      | 7.69  | 5.24  | 1.47  |
| NM_001145966   | MKI67     | 7.50  | 5.53  | 1.36  |
| NM_017709      | FAM46C    | 6.61  | 6.23  | 1.06  |
| NM_005816      | CD96      | 6.60  | 4.17  | 1.58  |
| NM_006433      | GNLY      | 6.12  | 4.85  | 1.26  |
| NM_175055      | HIST3H2BB | 5.85  | 3.76  | 1.56  |
| NM_021064      | HIST1H2AG | 5.78  | 2.96  | 1.95  |
| NM_018410      | HJURP     | 5.72  | 5.72  | 1.00  |
| NM_003514      | HIST1H2AM | 5.70  | 2.87  | 1.99  |
| NM_003536      | HIST1H3H  | 5.58  | 3.07  | 1.82  |
| NM_016448      | DTL       | 5.55  | 5.52  | 1.01  |
| NM_003548      | HIST2H4A  | 5.32  | 3.15  | 1.69  |

|                |                  |      |      |       |
|----------------|------------------|------|------|-------|
| NM_001034077   | <i>HIST2H4B</i>  | 5.32 | 3.15 | 1.69  |
| NM_003513      | <i>HIST1H2AB</i> | 5.28 | 3.73 | 1.42  |
| NM_014220      | <i>TM4SF1</i>    | 5.24 | 4.60 | 1.14  |
| NM_003527      | <i>HIST1H2BO</i> | 5.14 | 3.00 | 1.71  |
| NM_018136      | <i>ASPM</i>      | 5.07 | 5.85 | -1.15 |
| NM_001123375   | <i>HIST2H3D</i>  | 5.02 | 3.18 | 1.58  |
| NM_133272      | <i>FCAR</i>      | 4.87 | 4.42 | 1.10  |
| NM_178844      | <i>NLRC3</i>     | 4.86 | 3.69 | 1.32  |
| NM_002000      | <i>FCAR</i>      | 4.77 | 4.41 | 1.08  |
| NM_018004      | <i>TMEM45A</i>   | 4.71 | 3.23 | 1.46  |
| NM_006137      | <i>CD7</i>       | 4.65 | 3.05 | 1.52  |
| NM_003548.1    | <i>HIST2H4A</i>  | 4.50 | 2.84 | 1.59  |
| NM_001034077.1 | <i>HIST2H4B</i>  | 4.50 | 2.84 | 1.59  |
| NM_201538      | <i>NDRG2</i>     | 4.47 | 4.47 | 1.00  |
| NM_016343      | <i>CENPF</i>     | 4.42 | 3.12 | 1.42  |
| NM_021058      | <i>HIST1H2BJ</i> | 4.39 | 2.35 | 1.87  |
| NM_001168      | <i>BIRC5</i>     | 4.37 | 4.30 | 1.02  |
| NM_003546      | <i>HIST1H4L</i>  | 4.36 | 3.42 | 1.28  |
| NM_001164114   | <i>CASS4</i>     | 4.36 | 4.68 | -1.07 |
| NM_002575      | <i>SERPINB2</i>  | 4.30 | 4.57 | -1.06 |
| NM_003539      | <i>HIST1H4D</i>  | 4.24 | 2.88 | 1.47  |
| NM_012112      | <i>TPX2</i>      | 4.19 | 4.78 | -1.14 |
| NM_003538      | <i>HIST1H4A</i>  | 4.05 | 3.66 | 1.11  |
| NM_002928      | <i>RGS16</i>     | 4.05 | 2.14 | 1.89  |
| NM_020356      | <i>CASS4</i>     | 4.02 | 3.41 | 1.18  |
| NM_001255      | <i>CDC20</i>     | 3.99 | 3.44 | 1.16  |
| NM_003523      | <i>HIST1H2BE</i> | 3.97 | 2.46 | 1.62  |
| NM_003650      | <i>CST7</i>      | 3.86 | 2.01 | 1.92  |
| NM_004523      | <i>KIF11</i>     | 3.85 | 3.87 | -1.00 |
| NM_003524      | <i>HIST1H2BH</i> | 3.77 | 3.07 | 1.23  |
| NM_016426      | <i>GTSE1</i>     | 3.72 | 3.72 | 1.00  |
| NM_001003675   | <i>LDLRAD4</i>   | 3.70 | 2.79 | 1.33  |
| NM_018349      | <i>MCTP2</i>     | 3.66 | 3.09 | 1.18  |
| NM_012483      | <i>GNLY</i>      | 3.60 | 2.73 | 1.32  |
| NM_003525      | <i>HIST1H2BI</i> | 3.55 | 2.37 | 1.50  |
| NM_001163524   | <i>ITPRIPL1</i>  | 3.50 | 2.70 | 1.30  |
| NM_182914      | <i>SYNE2</i>     | 3.47 | 3.87 | -1.12 |
| NM_152515      | <i>CKAP2L</i>    | 3.43 | 3.43 | 1.00  |
| NM_001145664   | <i>RFX8</i>      | 3.43 | 3.43 | 1.00  |
| NM_030754      | <i>SAA2</i>      | 3.37 | 2.54 | 1.33  |

|              |                    |      |      |       |
|--------------|--------------------|------|------|-------|
| NM_001237    | <i>CCNA2</i>       | 3.33 | 2.78 | 1.20  |
| NM_001254    | <i>CDC6</i>        | 3.26 | 3.53 | -1.08 |
| NM_017720    | <i>STAP2</i>       | 3.25 | 2.21 | 1.47  |
| NM_001244950 | <i>SPOCK2</i>      | 3.25 | 4.77 | -1.47 |
| NM_001079907 | <i>ZNF331</i>      | 3.25 | 2.61 | 1.24  |
| NM_032108    | <i>SEMA6B</i>      | 3.24 | 3.50 | -1.08 |
| NM_144720    | <i>JAKMIP1</i>     | 3.16 | 3.16 | 1.00  |
| NM_003975    | <i>SH2D2A</i>      | 3.15 | 3.15 | 1.00  |
| NR_038380    | <i>SLC7A11-AS1</i> | 3.14 | 3.63 | -1.15 |
| NM_001144894 | <i>CD209</i>       | 3.14 | 2.98 | 1.05  |
| NM_003522    | <i>HIST1H2BF</i>   | 3.14 | 2.49 | 1.26  |
| NM_003544    | <i>HIST1H4B</i>    | 3.12 | 2.57 | 1.22  |
| NM_000608    | <i>ORM2</i>        | 3.02 | 3.17 | -1.05 |
| NM_001264573 | <i>KIF18B</i>      | 3.00 | 2.87 | 1.05  |
| NM_022770    | <i>GLIS3</i>       | 2.99 | 2.85 | 1.05  |
| NM_003542    | <i>HIST1H4C</i>    | 2.94 | 2.19 | 1.34  |
| NM_001252102 | <i>KIF21B</i>      | 2.89 | 3.15 | -1.09 |
| NR_073484    | <i>CDK2AP2</i>     | 2.79 | 2.25 | 1.24  |
| NM_012310    | <i>KIF4A</i>       | 2.77 | 2.77 | 1.00  |
| NM_080881    | <i>DBN1</i>        | 2.75 | 2.51 | 1.10  |
| NM_003530    | <i>HIST1H3D</i>    | 2.70 | 2.13 | 1.27  |
| NM_000094    | <i>COL7A1</i>      | 2.67 | 3.06 | -1.15 |
| NM_001242416 | <i>WDR20</i>       | 2.65 | 2.44 | 1.09  |
| NM_001017995 | <i>SH3PXD2B</i>    | 2.65 | 2.02 | 1.31  |
| NM_002358    | <i>MAD2L1</i>      | 2.60 | 2.82 | -1.08 |
| NM_004867    | <i>ITM2A</i>       | 2.58 | 2.58 | 1.00  |
| NM_001242608 | <i>NCAM1</i>       | 2.57 | 4.47 | -1.74 |
| NM_006101    | <i>NDC80</i>       | 2.56 | 2.86 | -1.12 |
| NM_173799    | <i>TIGIT</i>       | 2.55 | 2.73 | -1.07 |
| NM_138371    | <i>PCED1B</i>      | 2.51 | 2.07 | 1.21  |
| NM_013372    | <i>GREM1</i>       | 2.47 | 2.41 | 1.02  |
| NM_001145199 | <i>C12orf75</i>    | 2.42 | 2.42 | 1.00  |
| NR_028308    | <i>BRE-AS1</i>     | 2.41 | 2.50 | -1.04 |
| NM_080616    | <i>C20orf112</i>   | 2.41 | 2.58 | -1.07 |
| NM_018131    | <i>CEP55</i>       | 2.38 | 2.80 | -1.18 |
| NM_018518    | <i>MCM10</i>       | 2.37 | 2.37 | 1.00  |
| NM_005338    | <i>HIP1</i>        | 2.36 | 4.00 | -1.70 |
| NM_014450    | <i>SIT1</i>        | 2.36 | 2.36 | 1.00  |
| NM_198947    | <i>FAM111B</i>     | 2.35 | 2.35 | 1.00  |
| NM_201536    | <i>NDRG2</i>       | 2.34 | 2.34 | 1.00  |

|              |                    |       |       |       |
|--------------|--------------------|-------|-------|-------|
| NM_182751    | <i>MCM10</i>       | 2.32  | 2.30  | 1.01  |
| NM_201539    | <i>NDRG2</i>       | 2.31  | 2.05  | 1.13  |
| NR_002720    | <i>TRPC2</i>       | 2.28  | 2.61  | -1.14 |
| NM_001159531 | <i>BEGAIN</i>      | 2.22  | 2.06  | 1.08  |
| NR_045006    | <i>NRON</i>        | 2.17  | 2.53  | -1.17 |
| NM_001145319 | <i>PLS1</i>        | 2.16  | 2.81  | -1.31 |
| NM_133279    | <i>FCAR</i>        | 2.15  | 2.15  | 1.00  |
| NM_001761    | <i>CCNF</i>        | 2.14  | 2.57  | -1.20 |
| NM_001009936 | <i>PHF19</i>       | 2.10  | 2.10  | 1.00  |
| NM_173564    | <i>NYAP1</i>       | 2.06  | 2.06  | 1.00  |
| NM_014448    | <i>ARHGEF16</i>    | 2.03  | 2.15  | -1.06 |
| NM_004186    | <i>SEMA3F</i>      | 2.03  | 2.03  | 1.00  |
| NR_073090    | <i>MEAF6</i>       | 2.02  | 2.60  | -1.29 |
| NM_152400    | <i>C4orf32</i>     | -2.00 | -2.01 | 1.00  |
| NR_003323    | <i>SNORD116-8</i>  | -2.01 | -2.28 | 1.14  |
| NM_001256394 | <i>NOL8</i>        | -2.01 | -2.02 | 1.00  |
| NM_015548    | <i>DST</i>         | -2.01 | -2.85 | 1.41  |
| NM_001025235 | <i>TSPAN4</i>      | -2.02 | -3.62 | 1.79  |
| NR_003337    | <i>SNORD116-23</i> | -2.03 | -2.64 | 1.30  |
| NM_018649    | <i>H2AFY2</i>      | -2.04 | -2.44 | 1.20  |
| NM_201612    | <i>IKBIP</i>       | -2.05 | -3.20 | 1.56  |
| NM_024296    | <i>CCDC28B</i>     | -2.05 | -2.17 | 1.06  |
| NM_001207018 | <i>SMTN</i>        | -2.06 | -2.93 | 1.42  |
| NR_003340    | <i>SNORD116-26</i> | -2.07 | -2.31 | 1.12  |
| NM_017549    | <i>EPDR1</i>       | -2.07 | -2.95 | 1.42  |
| NM_001130709 | <i>RUFY3</i>       | -2.07 | -3.57 | 1.72  |
| NM_001144936 | <i>C11orf95</i>    | -2.08 | -2.39 | 1.15  |
| NM_001127399 | <i>YPEL5</i>       | -2.08 | -3.02 | 1.45  |
| NM_001465    | <i>FYB</i>         | -2.09 | -2.30 | 1.10  |
| NM_001102610 | <i>TUBGCP5</i>     | -2.11 | -2.42 | 1.15  |
| NM_018351    | <i>FGD6</i>        | -2.15 | -2.38 | 1.11  |
| NM_021238    | <i>FAM60A</i>      | -2.16 | -2.60 | 1.20  |
| NM_002030    | <i>FPR3</i>        | -2.16 | -2.14 | -1.01 |
| NM_014366    | <i>GNL3</i>        | -2.19 | -2.69 | 1.23  |
| NR_028301    | <i>LOC344595</i>   | -2.20 | -2.42 | 1.10  |
| NM_001077594 | <i>EXOC3L4</i>     | -2.20 | -2.03 | -1.08 |
| NM_021175    | <i>HAMP</i>        | -2.22 | -4.33 | 1.95  |
| NM_001024808 | <i>BCL7A</i>       | -2.23 | -3.26 | 1.46  |
| NM_014890    | <i>FILIP1L</i>     | -2.24 | -3.66 | 1.63  |
| NM_020440    | <i>PTGFRN</i>      | -2.25 | -3.35 | 1.49  |

|                |                     |       |       |       |
|----------------|---------------------|-------|-------|-------|
| NM_015431      | <i>TRIM58</i>       | -2.25 | -2.19 | -1.03 |
| NM_020759      | <i>STARD9</i>       | -2.29 | -2.48 | 1.08  |
| NR_003320.1    | <i>SNORD116-5</i>   | -2.31 | -2.34 | 1.01  |
| NR_003322      | <i>SNORD116-7</i>   | -2.31 | -2.34 | 1.01  |
| NM_022140      | <i>EPB41L4A</i>     | -2.37 | -2.02 | -1.18 |
| NM_002207      | <i>ITGA9</i>        | -2.37 | -4.62 | 1.95  |
| NM_173558      | <i>FGD2</i>         | -2.44 | -2.46 | 1.01  |
| NM_001001555   | <i>GRB10</i>        | -2.46 | -3.36 | 1.37  |
| NM_139320      | <i>CHRFAM7A</i>     | -2.48 | -2.56 | 1.03  |
| NM_145034      | <i>TOR1AIP2</i>     | -2.55 | -3.90 | 1.53  |
| NM_014398      | <i>LAMP3</i>        | -2.57 | -4.56 | 1.77  |
| NR_033738      | <i>LOC440300</i>    | -2.60 | -2.43 | -1.07 |
| NM_001253845   | <i>ADM2</i>         | -2.60 | -2.18 | -1.19 |
| NM_017688      | <i>BSPRY</i>        | -2.67 | -2.48 | -1.08 |
| NM_145267      | <i>C6orf57</i>      | -2.70 | -2.06 | -1.31 |
| NM_199349      | <i>KCP</i>          | -2.72 | -2.03 | -1.34 |
| NM_015196      | <i>KIAA0922</i>     | -2.73 | -4.24 | 1.55  |
| NM_032515      | <i>BOK</i>          | -2.75 | -2.42 | -1.14 |
| NR_002915      | <i>SNORA74A</i>     | -2.77 | -3.63 | 1.31  |
| NM_001135176   | <i>NEDD1</i>        | -2.84 | -2.68 | -1.06 |
| NM_001029955   | <i>DCAF4L1</i>      | -2.87 | -2.06 | -1.40 |
| NM_032438      | <i>L3MBTL3</i>      | -2.92 | -2.29 | -1.28 |
| NM_001002029.1 | <i>C4B</i>          | -2.96 | -2.01 | -1.47 |
| NM_001242823.1 | <i>LOC100293534</i> | -2.96 | -2.01 | -1.47 |
| NM_001014975   | <i>CFH</i>          | -2.96 | -2.78 | -1.07 |
| NM_001766      | <i>CD1D</i>         | -3.37 | -3.48 | 1.03  |
| NM_001101801   | <i>FAM13B</i>       | -3.46 | -3.88 | 1.12  |
| NR_073037      | <i>STOM</i>         | -3.46 | -3.22 | -1.08 |
| NR_038335      | <i>CLU</i>          | -3.48 | -2.39 | -1.46 |
| NM_006398.3    | <i>UBD</i>          | -3.57 | -6.29 | 1.76  |
| NM_001243752   | <i>C7orf49</i>      | -3.62 | -2.11 | -1.71 |
| NM_001171158   | <i>SIGLEC10</i>     | -3.75 | -2.77 | -1.36 |
| NM_016201      | <i>AMOTL2</i>       | -4.42 | -7.11 | 1.61  |
| NM_001127493   | <i>ANK2</i>         | -4.55 | -3.69 | -1.23 |
| NM_001127242   | <i>BBC3</i>         | -4.65 | -3.04 | -1.53 |
| NM_002852      | <i>PTX3</i>         | -4.73 | -5.51 | 1.17  |
| NM_001001550   | <i>GRB10</i>        | -4.82 | -4.60 | -1.05 |
| NM_001128934   | <i>SYNPO2</i>       | -4.88 | -7.28 | 1.49  |
| NM_001148      | <i>ANK2</i>         | -4.92 | -5.35 | 1.09  |
| NM_001006605   | <i>FAM69A</i>       | -5.89 | -4.97 | -1.18 |

**Table S3.** Predicted upstream regulators of transcripts that are uniquely and significantly modulated in Mob-MDM(LPS/IFN $\gamma$ ) relative to M-MDM(LPS/IFN $\gamma$ ) and GM-MDM-(LPS/IFN $\gamma$ ).

| Upstream regulators           | Activation z-score                                                   |                                         |
|-------------------------------|----------------------------------------------------------------------|-----------------------------------------|
|                               | Mob-MDM(LPS/IFN $\gamma$ )                                           | M-MDM(LPS/IFN $\gamma$ )                |
|                               | <i>vs.</i><br>GM-MDM(LPS/IFN $\gamma$ ) and M-MDM(LPS/IFN $\gamma$ ) | <i>vs.</i><br>GM-MDM(LPS/IFN $\gamma$ ) |
| CSF2                          | 4.61                                                                 | -0.64                                   |
| IL2                           | 3.98                                                                 | 1.92                                    |
| FOXM1                         | 3.84                                                                 | 0.73                                    |
| AREG                          | 3.77                                                                 | 0.90                                    |
| PTGER2                        | 3.75                                                                 | 0.60                                    |
| RABL6                         | 3.75                                                                 | -0.60                                   |
| ERK1/2                        | 3.66                                                                 | 1.73                                    |
| CCND1                         | 3.60                                                                 | 1.47                                    |
| IL15                          | 3.57                                                                 | 1.75                                    |
| MITF                          | 3.54                                                                 | -1.27                                   |
| E2F3                          | 3.47                                                                 | 0.96                                    |
| MIF                           | 3.39                                                                 | 0.10                                    |
| MAPK1                         | 3.36                                                                 | 0.19                                    |
| CEBPB                         | 3.22                                                                 | 1.00                                    |
| HGF                           | 3.20                                                                 | -1.05                                   |
| E. coli B5 lipopolysaccharide | 3.19                                                                 | 0.42                                    |
| KITLG                         | 3.05                                                                 | 0.88                                    |
| MED1                          | 3.03                                                                 | -0.43                                   |
| IL17A                         | 3.02                                                                 | 1.06                                    |
| EGF                           | 2.99                                                                 | 0.17                                    |
| Vegf                          | 2.96                                                                 | 0.75                                    |
| JUN                           | 2.93                                                                 | -0.22                                   |
| RAF1                          | 2.90                                                                 | -0.22                                   |
| IL1                           | 2.88                                                                 | 0.54                                    |
| ERBB2                         | 2.86                                                                 | 0.41                                    |
| FGF2                          | 2.85                                                                 | 1.19                                    |
| TBX2                          | 2.84                                                                 | -0.26                                   |
| EGFR                          | 2.80                                                                 | 0.77                                    |
| TCR                           | 2.80                                                                 | 1.32                                    |
| IL17a dimer                   | 2.79                                                                 | -0.19                                   |
| estrogen                      | 2.77                                                                 | 1.24                                    |
| CCL5                          | 2.74                                                                 | 0.94                                    |
| CSF1                          | 2.73                                                                 | 1.09                                    |
| leukotriene D4                | 2.62                                                                 | 0.35                                    |
| MET                           | 2.62                                                                 | 0.31                                    |
| Hsp90                         | 2.62                                                                 | 1.50                                    |
| LEP                           | 2.61                                                                 | -1.21                                   |
| MAPK7                         | 2.61                                                                 | -1.07                                   |

|                                                                    |      |       |
|--------------------------------------------------------------------|------|-------|
| tributyrin                                                         | 2.61 | 0.80  |
| NTRK2                                                              | 2.61 | 1.12  |
| ICAM1                                                              | 2.60 | 1.78  |
| Fcer1                                                              | 2.60 | -0.86 |
| Pam3-Cys-Ser-Lys4                                                  | 2.60 | 0.49  |
| IRF2                                                               | 2.59 | 1.10  |
| peptidoglycan                                                      | 2.58 | 0.26  |
| TNFSF11                                                            | 2.58 | 1.51  |
| Salmonella enterica serotype<br>abortus equi<br>lipopolysaccharide | 2.53 | 0.93  |
| lipopolysaccharide                                                 | 2.52 | 0.34  |
| BCR (complex)                                                      | 2.52 | 1.01  |
| ionomycin                                                          | 2.45 | 0.05  |
| 1,4-bis[2-(3,5-<br>dichloropyridyloxy)] benzene                    | 2.45 | -0.31 |
| SELPLG                                                             | 2.45 | 0.45  |
| E2F1                                                               | 2.44 | 1.75  |
| ICOS                                                               | 2.43 | 1.71  |
| IL-17f dimer                                                       | 2.43 | -0.97 |
| MAP2K1                                                             | 2.42 | 1.50  |
| POMC                                                               | 2.42 | 0.06  |
| TRAF6                                                              | 2.41 | 0.19  |
| zymosan                                                            | 2.41 | 0.20  |
| histamine                                                          | 2.41 | -0.84 |
| CD86                                                               | 2.40 | 1.72  |
| TLR5                                                               | 2.40 | 0.34  |
| EOMES                                                              | 2.40 | 0.95  |
| Ap1                                                                | 2.40 | 1.06  |
| hemozoin                                                           | 2.39 | 0.97  |
| PGF                                                                | 2.36 | 1.30  |
| E2F2                                                               | 2.34 | 1.72  |
| HRAS                                                               | 2.32 | 0.36  |
| PDGF BB                                                            | 2.31 | 1.32  |
| CYR61                                                              | 2.29 | 0.61  |
| dextran sulfate                                                    | 2.29 | 0.16  |
| IL1B                                                               | 2.29 | 1.71  |
| metribolone                                                        | 2.27 | 0.29  |
| CREB1                                                              | 2.27 | 0.75  |
| enterotoxin B                                                      | 2.25 | 0.71  |
| ASCL1                                                              | 2.24 | -0.45 |
| EWSR1                                                              | 2.24 | 0.00  |
| FSH                                                                | 2.24 | 0.45  |
| lipoarabinomannan                                                  | 2.24 | 0.45  |
| SMOC2                                                              | 2.24 | 0.45  |
| CD40                                                               | 2.23 | 1.30  |

|                                                  |       |       |
|--------------------------------------------------|-------|-------|
| IL12 (complex)                                   | 2.22  | 1.21  |
| A23187                                           | 2.22  | -0.33 |
| IL3                                              | 2.21  | -0.29 |
| AIMP1                                            | 2.21  | 0.39  |
| IGF1                                             | 2.20  | -0.44 |
| Mapk                                             | 2.20  | 1.45  |
| TREM1                                            | 2.19  | -0.04 |
| MALP-2s                                          | 2.19  | 1.46  |
| 5-hydroxytryptamine                              | 2.19  | -0.71 |
| TNFSF13B                                         | 2.19  | 0.62  |
| RET                                              | 2.18  | -0.32 |
| MYD88                                            | 2.18  | 0.02  |
| F2RL1                                            | 2.18  | -0.13 |
| ITK                                              | 2.17  | 0.29  |
| NR4A1                                            | 2.17  | 0.65  |
| MYB                                              | 2.15  | 1.11  |
| mycophenolic acid                                | 2.12  | 0.00  |
| salmonella minnesota R595<br>lipopolysaccharides | 2.11  | 0.64  |
| Ccl2                                             | 2.11  | 0.59  |
| uric acid                                        | 2.10  | -0.20 |
| TAC1                                             | 2.10  | 0.49  |
| E2f                                              | 2.10  | -0.35 |
| phytohemagglutinin                               | 2.09  | 0.69  |
| 8-bromo-cAMP                                     | 2.09  | -0.16 |
| phorbol myristate acetate                        | 2.08  | -0.29 |
| resiquimod                                       | 2.08  | -0.03 |
| cholesterol                                      | 2.06  | 0.17  |
| IL17F                                            | 2.06  | 1.28  |
| 26s Proteasome                                   | 2.03  | -0.03 |
| E. coli lipopolysaccharide                       | 2.01  | 0.29  |
| LDL                                              | 2.01  | 0.86  |
| poly rI:rC-RNA                                   | 2.01  | 1.00  |
| YAP1                                             | 2.00  | -1.00 |
| LATS2                                            | 2.00  | -1.00 |
| ANKRD42                                          | 2.00  | -1.00 |
| glucagon                                         | 2.00  | 0.00  |
| GNAI3                                            | 2.00  | 0.00  |
| 4-nitroquinoline-1-oxide                         | 2.00  | 0.00  |
| Fibrinogen                                       | 2.00  | 1.00  |
| CARM1                                            | 2.00  | 1.00  |
| 12-(3-adamantan-1-yl-ureido)<br>dodecanoic acid  | -2.00 | -1.00 |
| WWTR1                                            | -2.00 | -1.00 |
| SMARCE1                                          | -2.00 | -1.00 |
| vitamin D                                        | -2.00 | -1.00 |

|                                 |       |       |
|---------------------------------|-------|-------|
| TAF4                            | -2.00 | 0.00  |
| panobinostat                    | -2.00 | 0.00  |
| MSTN                            | -2.00 | 0.00  |
| ATF3                            | -2.06 | -0.94 |
| resveratrol                     | -2.06 | 1.84  |
| CTLA4                           | -2.11 | -1.40 |
| alvocidib                       | -2.13 | 0.25  |
| Irgm1                           | -2.16 | -0.28 |
| NCOA2                           | -2.17 | -0.08 |
| Ifn                             | -2.17 | 0.27  |
| silibinin                       | -2.17 | -0.21 |
| VIP                             | -2.17 | -1.25 |
| TSC22D3                         | -2.18 | -0.29 |
| ABCG1                           | -2.19 | -0.18 |
| 2-deoxyglucose                  | -2.20 | -0.44 |
| methotrexate                    | -2.21 | 0.70  |
| triflusal                       | -2.21 | 0.39  |
| SMARCB1                         | -2.22 | 0.43  |
| CBX5                            | -2.22 | -1.11 |
| Ciap                            | -2.22 | 0.55  |
| UXT                             | -2.23 | 1.06  |
| DYRK1A                          | -2.24 | 0.45  |
| BMS-690514                      | -2.24 | -1.34 |
| celecoxib                       | -2.24 | 0.24  |
| TP73                            | -2.33 | -1.53 |
| dexamethasone                   | -2.39 | -0.98 |
| glucocorticoid                  | -2.39 | 1.21  |
| sulforafan                      | -2.39 | 0.80  |
| PRDM1                           | -2.40 | -1.17 |
| mir-21                          | -2.41 | -0.70 |
| salicylic acid                  | -2.42 | 0.59  |
| Go 6976                         | -2.43 | -0.13 |
| rotenone                        | -2.43 | -0.13 |
| fulvestrant                     | -2.50 | -0.44 |
| zinc                            | -2.56 | 0.97  |
| medroxyprogesterone acetate     | -2.57 | 0.73  |
| simvastatin                     | -2.58 | 0.05  |
| infliximab                      | -2.61 | -0.69 |
| 2-amino-5-phosphonovaleric acid | -2.63 | -0.24 |
| Rb                              | -2.65 | -0.94 |
| CDKN2A                          | -2.65 | -1.76 |
| imipramine blue                 | -2.75 | -0.57 |
| KDM5B                           | -2.81 | 1.87  |
| alefacept                       | -2.81 | -1.91 |
| epigallocatechin-gallate        | -2.90 | -0.88 |

|                                       |       |       |
|---------------------------------------|-------|-------|
| U0126                                 | -3.05 | -0.80 |
| vorinostat                            | -3.05 | -0.92 |
| aspirin                               | -3.08 | -0.63 |
| NUPR1                                 | -3.15 | -1.96 |
| RBL2                                  | -3.18 | -0.28 |
| let-7                                 | -3.20 | 0.02  |
| RBL1                                  | -3.23 | -1.59 |
| miR-155-5p (miRNAs w/seed<br>UAAUGCU) | -3.27 | -0.82 |
| curcumin                              | -3.27 | 0.17  |
| TP53                                  | -3.29 | 1.21  |
| RB1                                   | -3.35 | -0.69 |
| calcitriol                            | -3.49 | -0.43 |
| CD28                                  | -3.52 | -0.11 |
| CDKN1A                                | -3.66 | 0.04  |
| CD3                                   | -3.97 | -1.86 |
| LY294002                              | -4.31 | -1.74 |

**Table S4.** Predicted biological functions that are uniquely and significantly modulated in Mob-MDM(LPS/IFN $\gamma$ ) relative to M-MDM(LPS/IFN $\gamma$ ) and GM-MDM-(LPS/IFN $\gamma$ ).

| Diseases and Bio Functions                | Activation z-score                                                      |                                         |
|-------------------------------------------|-------------------------------------------------------------------------|-----------------------------------------|
|                                           | Mob-MDM(LPS/IFN $\gamma$ )                                              | M-MDM(LPS/IFN $\gamma$ )                |
|                                           | <i>vs.</i><br>GM-MDM(LPS/IFN $\gamma$ ) and<br>M-MDM(LPS/IFN $\gamma$ ) | <i>vs.</i><br>GM-MDM(LPS/IFN $\gamma$ ) |
| Activation of blood cells                 | 3.70                                                                    | 1.05                                    |
| Activation of cells                       | 3.63                                                                    | 1.08                                    |
| Cellular homeostasis                      | 3.62                                                                    | 0.55                                    |
| Activation of lymphatic system cells      | 3.60                                                                    | 1.44                                    |
| Activation of leukocytes                  | 3.60                                                                    | 0.88                                    |
| Leukopoiesis                              | 3.57                                                                    | 0.37                                    |
| Cell cycle progression                    | 3.51                                                                    | -0.66                                   |
| Activation of lymphocytes                 | 3.50                                                                    | 1.33                                    |
| Differentiation of mononuclear leukocytes | 3.45                                                                    | -0.12                                   |
| Cell proliferation of tumor cell lines    | 3.34                                                                    | 0.68                                    |
| Lymphocyte homeostasis                    | 3.33                                                                    | 0.47                                    |
| Hematopoiesis of mononuclear leukocytes   | 3.33                                                                    | 0.07                                    |
| Growth of malignant tumor                 | 3.33                                                                    | -0.74                                   |
| Cell survival                             | 3.31                                                                    | 0.30                                    |
| Lymphopoiesis                             | 3.28                                                                    | 0.24                                    |
| Stimulation of cells                      | 3.23                                                                    | 0.81                                    |
| Mitosis                                   | 3.20                                                                    | -1.47                                   |
| Metabolism of DNA                         | 3.14                                                                    | 0.85                                    |
| Infiltration by myeloid cells             | 3.12                                                                    | 1.19                                    |
| Cellular infiltration by myeloid cells    | 3.03                                                                    | 1.06                                    |
| T cell development                        | 2.97                                                                    | 0.07                                    |
| Proliferation of tumor cells              | 2.96                                                                    | -0.63                                   |
| Activation of neutrophils                 | 2.95                                                                    | 0.38                                    |
| Cellular infiltration by granulocytes     | 2.90                                                                    | 0.91                                    |
| Activation of T lymphocytes               | 2.88                                                                    | 1.38                                    |
| Synthesis of reactive oxygen species      | 2.87                                                                    | 0.26                                    |
| Cell viability                            | 2.87                                                                    | -0.12                                   |
| Proliferation of cancer cells             | 2.85                                                                    | -0.04                                   |

|                                            |      |       |
|--------------------------------------------|------|-------|
| Metabolism of reactive oxygen species      | 2.84 | 0.28  |
| Recruitment of cells                       | 2.83 | 0.03  |
| Activation of granulocytes                 | 2.83 | 0.34  |
| Cell movement of myeloid cells             | 2.80 | 1.13  |
| Maturation of leukocytes                   | 2.80 | -0.67 |
| Growth of epithelial tissue                | 2.79 | -0.74 |
| Mobilization of neutrophils                | 2.77 | -0.19 |
| Cellular infiltration by phagocytes        | 2.74 | 0.84  |
| Cell proliferation of carcinoma cell lines | 2.70 | -0.57 |
| Differentiation of helper T lymphocytes    | 2.65 | -1.15 |
| Angiogenesis                               | 2.58 | 0.13  |
| Development of vasculature                 | 2.58 | 0.13  |
| Chemotaxis of leukocytes                   | 2.55 | 1.62  |
| Mobilization of leukocytes                 | 2.54 | 0.31  |
| Influx of leukocytes                       | 2.54 | -0.21 |
| Chemotaxis of myeloid cells                | 2.54 | 1.25  |
| Binding of myeloid cells                   | 2.52 | 1.22  |
| Ion homeostasis of cells                   | 2.51 | 0.94  |
| Differentiation of T lymphocytes           | 2.50 | 0.54  |
| Mobilization of myeloid cells              | 2.49 | -0.54 |
| Stimulation of leukocytes                  | 2.49 | 0.54  |
| Interaction of DNA                         | 2.47 | 1.57  |
| Chemotaxis                                 | 2.42 | 0.84  |
| Flux of Ca <sup>2+</sup>                   | 2.41 | 0.96  |
| Maturation of lymphatic system cells       | 2.37 | -0.21 |
| Adhesion of immune cells                   | 2.35 | 1.14  |
| Accumulation of cells                      | 2.34 | -0.87 |
| Mobilization of blood cells                | 2.33 | 0.08  |
| Homing of cells                            | 2.32 | 0.89  |
| Stimulation of lymphocytes                 | 2.31 | 1.18  |
| Binding of professional phagocytic cells   | 2.31 | 1.12  |
| Flux of ion                                | 2.30 | 0.63  |
| Cell movement of granulocytes              | 2.28 | 0.67  |
| Tumorigenesis of neuroepithelial tumor     | 2.27 | -0.55 |

|                                                   |       |       |
|---------------------------------------------------|-------|-------|
| Migration of myeloid cells                        | 2.26  | -0.45 |
| Digestive system cancer                           | 2.24  | -0.88 |
| Cell movement of macrophages                      | 2.24  | 0.64  |
| Growth of tumor                                   | 2.23  | -0.40 |
| Maturation of blood cells                         | 2.21  | -1.40 |
| Influx of blood cells                             | 2.21  | -0.46 |
| Homing of leukocytes                              | 2.20  | 1.88  |
| Binding of DNA                                    | 2.19  | 1.62  |
| Interphase of gonadal cells                       | 2.18  | -1.21 |
| Cell viability of tumor cells                     | 2.18  | 1.15  |
| Cell movement of phagocytes                       | 2.17  | 1.11  |
| Migration of cells                                | 2.17  | 0.45  |
| Activation of phagocytes                          | 2.15  | 0.00  |
| Abdominal cancer                                  | 2.15  | -0.61 |
| Alignment of chromosomes                          | 2.14  | 0.00  |
| Phosphorylation of protein                        | 2.12  | -0.19 |
| Recruitment of leukocytes                         | 2.12  | -0.07 |
| Adhesion of blood cells                           | 2.10  | 0.44  |
| Eosinophilia                                      | 2.10  | -0.65 |
| Glioma                                            | 2.07  | -0.27 |
| Cell movement                                     | 2.07  | 0.28  |
| Binding of blood cells                            | 2.06  | 0.36  |
| Cell movement of antigen<br>presenting cells      | 2.06  | 1.21  |
| Binding of leukocytes                             | 2.05  | 0.89  |
| Chemotaxis of neutrophils                         | 2.04  | 0.87  |
| Gastrointestinal tract cancer                     | 2.03  | -1.19 |
| Quantity of lymphoid cells                        | 2.02  | 1.13  |
| Maturation of cells                               | 2.01  | -0.97 |
| Migration of granulocytes                         | 2.01  | -0.21 |
| Transmigration of cells                           | 2.00  | 0.34  |
| Entry into interphase of oocytes                  | 2.00  | -1.00 |
| Malignant neoplasm of large<br>intestine          | 2.00  | -1.00 |
| Apoptosis of cancer cells                         | -2.28 | 1.33  |
| Myelopoiesis of hematopoietic<br>progenitor cells | -2.38 | -1.67 |
| Megakaryocytopoiesis                              | -2.55 | -1.18 |
| Hematopoiesis of bone marrow<br>cells             | -2.55 | -1.18 |
| Myelopoiesis of bone marrow                       | -2.55 | -1.18 |

|                              |       |       |
|------------------------------|-------|-------|
| Hematopoiesis of bone marrow | -2.55 | -1.18 |
|------------------------------|-------|-------|
